# Supplementary material for: Taste quality and hunger interactions in a feeding sensorimotor circuit
Source: eLife. 2022 Jul 6;11:e79887. doi: 10.7554/eLife.79887 (PMC9292995; doi:10.7554/eLife.79887)
Supplement: Figure 1—figure supplement 2—source data 1. [file elife-79887-fig1-figsupp2-data1.xlsx]

## Sheet: Figure 1- Supplement 2B
	SS31082 > CsChrimson	Empty Split ∩ Dfd > CsChrimson	Cleaver: SS31082 ∩ Dfd > CsChrimson	Empty Split ∩ Scr > CsChrimson	Usnea: SS31082 ∩ Scr > CsChrimson	CsChrimson/+	SS32590/+	SS32590>CsChrimson	SS32591/+	SS32591>CsChrimson
Number of flies extending proboscis	26	1	2	1	9	1	0	1	0	0
Number of flies that did not extend proboscis	4	29	28	29	19	29	28	29	20	30

## Sheet: Figure 1- Supplement 2C
	GtACR1/+	Zorro (SS67405)/+	Zorro (SS67405) > GtACR1	Zorro (SS67406)/+	Zorro (SS67406) > GtACR1	Clavicle (SS48947)/+	Clavicle (SS48947) > GtACR1	G2N-1 (SS47082)/+	G2N-1 (SS47082) > GtACR1	G2N-1 (SS56399)/+	G2N-1 (SS563992) > GtACR1	Rattle (SS50091)/+	Rattle (SS50091) > GtACR1	Usnea (SS37122)/+	Usnea (SS37122) > GtACR1	FMIn (SS48944)/+	FMIn (SS48944) > GtACR1	FMIn (SS48949)/+	FMIn (SS48949) > GtACR1
Number of flies extending proboscis	134	44	44	44	25	29	26	51	47	30	29	55	25	52	5	28	28	30	27
Number of flies that did not extend proboscis	10	6	9	6	4	1	4	9	11	0	1	5	35	8	55	2	2	0	3
