# Supplementary material for: Taste quality and hunger interactions in a feeding sensorimotor circuit
Source: eLife. 2022 Jul 6;11:e79887. doi: 10.7554/eLife.79887 (PMC9292995; doi:10.7554/eLife.79887)
Supplement: Figure 1—source data 1. [file elife-79887-fig1-data1.xlsx]

## Sheet: Figure 1D
	CsChrimson/+	SS67405/+	SS67405>CsChrimson	SS67406/+	SS67406>CsChrimson	CsChrimson/+	SS48947/+	SS48947>CsChrimson	CsChrimson/+	SS47082/+	SS47082>CsChrimson	SS56399/+	SS56399>CsChrimson	CsChrimson/+	SS50091/+	SS50091>CsChrimson	CsChrimson/+	SS37122/+	SS37122>CsChrimson	CsChrimson/+	SS48944/+	SS48944>CsChrimson	SS48949/+	SS48949>CsChrimson	CsChrimson/+	SS44877/+	SS44877>CsChrimson	SS44879/+	SS44879>CsChrimson
Number of flies extending proboscis	0	0	24	0	26	0	0	15	0	0	30	0	30	0	0	29	0	1	20	0	0	24	0	30	0	24	0	0	27
Number of flies that did not extend proboscis	30	29	6	30	4	30	30	15	30	30	30	30	30	30	30	30	30	29	10	30	30	6	30	30	30	6	30	30	2

## Sheet: Figure 1E
	GtACR1/+	SS67405/+	SS67405>GtACR1	SS67406/+	SS67406>GtACR1	GtACR1/+	SS48947/+	SS48947>GtACR1	GtACR1/+	SS47082/+	SS47082>GtACR1	SS56399/+	SS56399>GtACR1	GtACR1/+	SS50091/+	SS50091>GtACR1	GtACR1/+	SS37122/+	SS37122>GtACR1	GtACR1/+	SS48944/+	SS48944>GtACR1	SS48949/+	SS48949>GtACR1	GtACR1/+	SS44877/+	SS44877>GtACR1	SS44879/+	SS44879>GtACR1
Number of flies extending proboscis	47	49	45	38	34	71	76	38	49	48	35	45	44	46	47	13	37	32	6	58	63	34	39	49	40	47	44	46	44
Number of flies that did not extend proboscis	13	14	38	7	22	19	13	51	9	12	23	1	14	14	13	47	13	8	38	18	13	43	17	36	20	13	16	9	16
