# Supplementary material for: Taste quality and hunger interactions in a feeding sensorimotor circuit
Source: eLife. 2022 Jul 6;11:e79887. doi: 10.7554/eLife.79887 (PMC9292995; doi:10.7554/eLife.79887)
Supplement: Figure 2—source data 1. [file elife-79887-fig2-data1.xlsx]

## Sheet: Figure 2D
	CsChrimson/+	SS31320/+	SS31320>CsChrimson	SS31386/+	SS31386>CsChrimson	CsChrimson/+	SS31333/+	SS31333>CsChrimson	SS46913/+	SS46913>CsChrimson	CsChrimson/+	SS47744/+	SS47744>CsChrimson	SS47745/+	SSS47745>CsChrimson
Number of flies extending proboscis	0	0	29	0	28	0	0	30	0	30	0	1	30	0	29
Number of flies that did not extend proboscis	30	30	1	30	2	30	30	0	30	0	30	29	0	30	0

## Sheet: Figure 2E
	GtACR1/+	SS31320/+	SS31320>GtACR1	SS31386/+	SS31386>GtACR1	GtACR1/+	SS31333/+	SS31333>GtACR1	SS46913/+	SS46913>GtACR1	GtACR1/+	SS47744/+	SS47744>GtACR1	SS47745/+	SSS47745>GtACR1
Number of flies extending proboscis	60	46	37	60	46	48	35	31	48	42	78	33	27	41	49
Number of flies that did not extend proboscis	30	14	23	30	14	12	10	16	12	18	18	7	15	9	21
