# Supplementary material for: Taste quality and hunger interactions in a feeding sensorimotor circuit
Source: eLife. 2022 Jul 6;11:e79887. doi: 10.7554/eLife.79887 (PMC9292995; doi:10.7554/eLife.79887)
Supplement: Figure 3—figure supplement 1—source data 1. [file elife-79887-fig3-figsupp1-data1.xlsx]

## Sheet: SS46913_Fdg_Opto
Responses of Fdg (SS46913) to optogenetic activation of GRNs in food-deprived animals				ppk28-LexaA						Gr5a-LexA							Gr66a_LexA
Frame	Time (seconds)	660 nm light ON		Fly1_ppk28	Fly2_ppk28	Fly3_ppk28	Fly4_ppk28	Fly5_ppk28		Fly1_Gr5a	Fly2_Gr5a	Fly3_Gr5a	Fly4_Gr5a	Fly5_Gr5a	Fly6_Gr5a		Fly1_Gr66a	Fly2_Gr66a	Fly3_Gr66a	Fly4_Gr66a	Fly5_Gr66a	Fly6_Gr66a	Fly7_Gr66a
0	0	0		0.0323151	0.021564	0.0327316	-0.0195489	0.0220971		0.0150555	0.046485	0.00322379	0.0121998	-0.0129273	0.0569217		-0.0293706	0.00689351	0.0230782	-0.124788	-0.00136943	-0.0216884	-0.0489515
1	0.67	0		0.0120859	0.03178	-0.00199287	0.000227732	0.00303925		-0.0126944	0.0146475	3.18671e-05	-0.0111848	-0.0112885	0.0117203		-0.0113208	0.0125232	-0.00456298	0.016687	-0.00830746	0.00619007	-0.0171277
2	1.34	0		-0.010427	0.0135284	-0.00278974	-0.00461393	0.0185916		0.0240872	0.00830377	-0.013503	0.024079	-0.00403547	-0.0283913		0.0265732	0.0012952	0.0386083	0.00224423	-0.00388098	-0.0228628	-0.00378259
3	2.01	0		0.00968283	-0.0548136	-0.00999718	-0.00841718	-0.00260632		0.0034672	0.0276982	0.000747639	-0.0263077	0.0145394	-0.0191584		-0.0129325	-0.004042	0.055252	0.0372042	-0.0229727	0.00336636	-0.033624
4	2.68	0		-0.0333071	0.00385291	0.00334982	-0.00318166	-0.00311455		-0.0165027	-0.0150854	-0.0295127	-0.0110057	0.011684	0.00202572		-0.0157548	0.00763273	0.0251921	-0.000429805	0.0649118	-0.023991	-0.00176253
5	3.35	0		-0.0192314	-0.041615	0.0213158	0.0243433	0.00873794		0.00588794	-0.0420561	-0.00428269	-0.0403279	0.0200535	-0.0337535		-0.017663	0.00255195	-0.0507924	0.00368509	-0.0298003	-0.00354129	-0.0292514
6	4.02	0		-0.062911	0.0266592	-0.039215	0.041021	-0.00407631		-0.00899997	-0.000422242	-0.0173495	-0.0263881	0.0300932	0.0115198		-0.0198604	-0.0273203	0.0571438	0.00985836	0.0137483	-0.0190942	0.02929
7	4.69	0		0.0117857	-0.019646	-0.00162098	-0.0117575	-0.0207037		-0.00483484	0.023874	0.00828365	0.00476676	0.0192589	0.000490947		-0.0054156	0.0273315	-0.00319744	0.00703018	0.00776725	0.0135059	-0.00614171
8	5.36	0		-0.00473058	-0.0313757	0.00963259	0.0279598	-0.012303		-0.00122872	0.0313965	0.0137711	0.000846354	0.00479871	0.00698669		0.0217545	0.00102974	-0.0236792	-0.0136698	0.0116098	0.0502971	-0.00431038
9	6.03	0		0.00208764	0.0583952	-0.0208486	0.0145604	-0.0053201		-0.000309834	-0.0161127	-0.0303898	0.0170716	0.00969692	0.0265677		0.0258499	0.0201943	-0.0269571	-0.00854422	-0.00356898	0.00400858	0.0368522
10	6.7	0		0.0288764	-0.0113661	0.0112696	-0.0142164	0.0101344		0.0118974	-0.0350105	0.013718	0.0271776	-0.0144102	-0.0202079		-0.0139537	-0.0135367	-0.0299449	0.0466848	0.0160856	-0.0139062	0.0406633
11	7.37	0		0.00274663	-0.0179603	0.00428887	-0.0153285	0.00719298		0.0149335	-0.0245286	0.0240808	0.0235112	-0.0251815	-0.0145938		0.0119388	-6.83913e-05	-0.00126109	0.0358834	-0.0312189	-0.000231013	-0.0245077
12	8.04	0		0.0270544	0.00281341	0.00470141	-0.00409183	-0.0136042		-0.0269996	-0.00997666	0.0308616	0.0033663	-0.0317236	0.00409622		0.0223978	-0.017557	-0.00586756	-0.0157762	-0.0491173	-0.00964875	0.0173506
13	8.71	0		0.00397264	0.0181836	-0.0108254	-0.0269563	-0.00806516		-0.00375868	-0.00921281	0.000319172	0.00219565	-0.010558	-0.00422434		0.0177573	-0.0169277	-0.0530118	0.00393062	0.0361133	0.0375956	0.0453034
14	9.38	1		-0.0142578	-0.0113265	0.010169	-0.0328119	-0.0109163		-0.0414336	0.00850398	-0.0101162	0.0230034	-0.0148285	0.0170812		0.0481884	-0.00457712	-0.0272202	0.00100829	0.0284637	0.00705367	-0.0164106
15	10.05	1		0.0328117	0.115761	0.0589143	0.0042141	-0.00899945		0.514314	0.655544	0.436815	0.759843	0.44499	1.02793		-0.00378632	-0.021811	0.0457718	0.0306608	0.0462161	0.0435607	0.0360075
16	10.72	1		0.021567	0.0954705	0.0408158	0.0635372	-0.000691607		0.434486	0.500037	0.364715	0.503079	0.355832	0.911777		0.0440139	-0.014021	0.0654436	0.0412675	0.0614141	0.0405571	0.055418
17	11.39	1		-0.027363	0.124439	-0.070426	0.0322235	0.0165535		0.258203	0.359845	0.206014	0.361414	0.244568	0.665622		0.0647401	-0.00222368	0.105415	0.0382002	0.0297026	0.0364253	0.120236
18	12.06	0		0.0118707	0.0645964	0.00141985	0.0597295	0.0266557		0.213712	0.256235	0.145923	0.258529	0.246572	0.549604		0.0852368	0.0244863	0.117154	0.0233467	0.0788399	0.0679167	0.0843711
19	12.73	0		0.00434375	-0.000599116	-0.0177786	0.0270073	-0.0115382		0.15813	0.222058	0.0621507	0.212713	0.163665	0.419673		0.0265141	0.0168755	0.0150655	0.0626874	0.10045	0.0500919	0.077832
20	13.4	0		-0.00702737	0.050229	-0.0128373	-0.032417	-0.0177951		0.115161	0.170912	0.0737375	0.141466	0.11649	0.294402		0.0101217	-0.00220475	0.074741	0.0548121	0.1146	0.000258438	0.0389999
21	14.07	0		-0.0281865	0.0392531	0.00177554	-0.069771	-0.0255167		0.11789	0.109595	0.0481283	0.108607	0.0898757	0.190628		-0.0176583	0.0143318	0.0159317	0.133302	-0.0460155	0.0437809	0.0744706
22	14.74	0		-0.0198672	-0.00928056	-0.0100052	-0.0648061	-0.0119555		0.0855212	0.106641	0.0455698	0.108558	0.0716337	0.185323		0.0510932	0.0274545	0.0234451	0.125654	-0.015927	0.00924611	0.0426293
23	15.41	0		0.00717714	0.0392417	0.00869335	-0.0312876	-0.00498394		0.0820133	0.117492	0.0787607	0.103865	0.0685134	0.187685		-0.00772863	0.0219566	-0.0596701	0.0715449	0.0200422	0.0298901	0.0554213
24	16.08	0		0.0156811	-0.0435985	0.0145663	0.00595451	-0.00874652		0.0558307	0.0517303	0.0793541	0.115514	0.0265262	0.131404		0.013176	-0.0040855	-0.0239699	0.117032	0.00112754	-0.0278293	0.0342419
25	16.75	0		0.0123471	-0.077238	0.0270962	-0.0391126	-0.00936498		-0.0241746	0.0418456	0.0663736	0.121766	0.0185886	0.14396		-0.0153656	-0.0109087	-0.0411135	0.0672371	0.0373513	0.061645	0.0420013
26	17.42	0		-0.0119584	-0.010345	-0.0281757	-0.0258856	0.0106763		-0.0222074	0.0348044	0.0544635	0.0598186	0.0156686	0.092581		-0.00154311	-0.0371342	-0.00802896	0.0985142	0.0407186	0.00418269	0.0415308
27	18.09	0		0.00302834	0.0383907	-0.00338285	-0.0785694	0.0113571		0.00270998	0.030598	0.0659155	0.0341123	0.0102158	0.0700789		-0.00274577	-0.0472232	0.0130301	0.080467	0.0094404	-0.00247764	-0.0218349
28	18.76	0		0.0393955	-0.023276	-0.0320239	-0.0617439	0.0111192		0.0175515	0.0108397	0.0364279	0.0159775	-0.0101679	0.0946559		0.0227855	-0.0340296	-0.0352786	0.0552764	-0.01602	0.00549538	0.0336952
29	19.43	0		0.0286711	0.017253	0.0169474	-0.0937601	0.0195325		0.0121685	0.0186241	0.0346935	0.0714908	-0.0244171	0.0418075		0.00804638	-0.0449073	0.0318006	0.0490099	0.024091	-0.0577504	0.00483976
30	20.1	0		-0.0170382	0.0411168	0.0121539	-0.0599272	0.0201503		0.00391589	0.0298462	0.0252809	0.0493037	-0.0255432	0.000729436		0.00596768	-0.0283502	-0.0198505	-0.0535312	-0.0457655	-0.00664748	0.00736483
31	20.77	0		-0.0489928	-0.0182605	-0.0250081	-0.0551924	0.0122509		0.0318569	0.0145088	-0.0255698	0.0173558	-0.0375583	0.00723825		0.00851481	-0.0310073	0.0097417	0.0439572	0.0895037	-0.0379498	0.0816905
32	21.44	1		-0.0247862	-0.054828	-0.00330633	-0.0958237	-0.0142316		0.0353036	0.00488806	-0.0725766	-0.00419908	-0.0117178	0.0227532		0.0328845	0.0113325	-0.0422071	0.0572554	-0.00776373	-0.0299491	-0.0310117
33	22.11	1		0.00915961	0.00676795	-0.0151766	-0.0916161	-0.0279457		0.354864	0.327965	0.160455	0.585392	0.281608	0.900616		-0.0198709	0.0112845	-0.0410168	0.0819983	0.02924	0.021555	0.0863144
34	22.78	1		0.00057968	0.0444453	-0.00157927	0.0129018	-0.00080289		0.333629	0.280865	0.13076	0.416918	0.217151	0.785841		-0.0100161	0.0263022	0.00590414	0.0611995	0.0182614	0.00893768	0.0857014
35	23.45	1		0.006903	0.0367162	0.0159598	0.0123192	-0.00436271		0.17742	0.187967	0.0789057	0.246432	0.139323	0.516334		0.0676399	0.00968305	0.107444	-0.0103377	0.0699979	-0.00255662	0.0564417
36	24.12	0		-0.0368112	-0.00773533	-0.0465439	-0.0212826	0.0312874		0.172306	0.16097	0.0622329	0.219444	0.109105	0.442917		0.037247	0.0398007	0.0434961	0.0156513	0.0908321	-0.0126506	0.060532
37	24.79	0		-0.00255595	-0.0153216	-0.0627209	-0.0841842	0.00353187		0.128346	0.108438	0.0163201	0.159554	0.047723	0.367379		0.0236003	0.0394621	0.0413306	0.0356434	0.0285658	0.00664032	0.01732
38	25.46	0		-0.030586	-0.023441	-0.0402654	-0.0603662	0.0289235		0.103845	0.0630158	0.00551386	0.0931587	0.0321127	0.28439		0.0481233	0.0365514	0.0495859	0.107245	0.0343918	0.0103392	0.0108283
39	26.13	0		-0.0422678	-0.0263446	-0.0172897	-0.0728166	0.0288285		0.0570551	0.078688	0.0161238	0.105081	0.0147412	0.218451		-0.0139159	0.0307809	-0.00204114	-0.00563665	0.0371478	0.0287106	0.0242698
40	26.8	0		-0.00948973	-0.00688706	-0.00237299	-0.104317	0.0119478		0.0436894	0.0537105	0.0498183	0.0917457	0.0395144	0.199945		0.0127553	0.00297365	0.054796	0.0333838	-0.00698736	-0.0209834	0.0366583
41	27.47	0		-0.0256437	-0.0584098	0.000659165	-0.0714191	0.0172866		0.0707277	0.0491229	0.0489593	0.0910723	0.0505123	0.172213		0.029238	0.0212886	0.0590462	-0.00670553	0.0488161	-0.0475982	0.00793362
42	28.14	0		-0.0207085	0.0037481	0.0289461	-0.0592078	0.0086637		0.0496819	0.00798139	0.0300066	0.0389463	0.0333886	0.154472		0.000916964	-0.00048047	0.0588955	0.0378227	0.026921	0.00683748	0.0492023
43	28.81	0		-0.0215631	-0.093852	0.0220453	-0.0582914	0.0263583		0.040148	0.0402007	0.0387408	0.0243329	0.0350346	0.153484		0.00117591	0.0208028	0.0493216	0.0500031	0.0120012	-0.0220545	0.0888597
44	29.48	0		-0.0037283	0.00278859	0.0298438	-0.0945813	0.026596		0.0522053	0.00099567	0.013362	0.0507927	0.0556331	0.150675		0.0420106	-0.00264822	0.0185321	0.0884937	0.05121	0.0385024	0.0207191
45	30.15	0		0.0012402	-0.0673168	0.0305801	-0.100131	0.0323704		0.0581687	-0.0184782	0.0473854	0.03926	-0.00244408	0.0295354		0.000983252	-0.0157582	0.0731357	0.0243048	0.0314742	-0.0125883	0.023906
46	30.82	0		-0.0107196	-0.0739417	0.00674864	-0.087355	0.0210329		-0.00564288	-0.0242717	0.030293	-0.00238279	9.69876e-05	0.0738333		0.0126906	-0.0272261	0.0341132	-0.0286129	0.0646409	-0.000861706	-0.0186356
47	31.49	0		-0.0108589	0.0402092	0.0544382	-0.0725283	0.0460295		0.0166209	-0.0574447	0.00733346	0.00308406	0.0184504	0.0297155		0.0377485	-0.0338697	0.0314273	-0.0246798	-0.00726014	0.0156476	-0.0326472
48	32.16	0		0.0145476	0.00436019	0.0227916	-0.0701793	0.0281196		0.0392893	-0.0188572	-0.00758657	0.000138672	-0.0272607	0.0387477		0.0193509	-0.00216287	-0.0303627	-0.086083	0.0675365	0.00293514	0.0157204
49	32.83	0		0.0542909	-0.0404189	-0.0113384	-0.0983898	0.0426735		-0.00270503	-0.028272	-0.0457343	-0.0252274	-0.0268427	0.0573661		0.0194425	-0.0101879	0.0474304	0.0286772	0.0185853	-0.00502463	-0.0260872
50	33.5	1		0.0119659	-0.0842533	-0.0415197	-0.0940558	0.0271809		0.0325875	-0.0427278	-0.0828294	-0.00271138	-0.0293827	0.0549939		0.0157459	0.0123891	0.0604217	0.0888352	-0.0149609	-0.0335938	-0.0330741
51	34.17	1		0.00979639	0.00101307	0.0348084	-0.133656	0.0196942		0.302618	0.206416	0.186668	0.350327	0.428256	0.725345		0.0464599	0.0073533	-0.000574804	0.0265432	-0.0127348	0.0389325	0.0500321
52	34.84	1		-0.00921925	-0.0242163	-0.0164349	-0.118699	0.00671707		0.258536	0.159232	0.170986	0.191537	0.326505	0.566005		0.0278707	0.0507484	0.0998035	0.0940227	-0.0205149	0.0231669	0.0522825
53	35.51	1		-0.0192251	-0.00106562	-0.0458777	-0.098119	0.00217845		0.162752	0.0699129	0.118878	0.0852902	0.223748	0.353188		0.0525004	0.00532506	0.0521511	0.0640591	0.0694961	0.0245724	0.0957821
54	36.18	0		-0.031101	-0.0633369	-0.00109104	-0.0602278	0.0111221		0.106258	0.0604941	0.115365	0.0766765	0.193974	0.268156		0.036397	0.0177932	0.0699622	0.06009	0.041681	0.0803259	0.118424
55	36.85	0		-0.0588675	0.0243679	0.0474041	-0.0992417	-0.036609		0.0920994	0.0309454	0.0828667	0.0444092	0.155286	0.141459		0.0423809	0.0389112	0.0778612	0.066542	-0.0591608	0.0212241	0.0569865
56	37.52	0		-0.035601	-0.0952181	-0.0195336	-0.0957172	-0.0254584		0.0580403	0.0226761	0.0816533	0.0364665	0.137576	0.135671		-0.00669141	-0.00732661	0.0840459	0.0907154	0.0986778	-0.00966951	0.119742
57	38.19	0		-0.0518452	-0.0117966	-0.00300274	-0.0961493	-0.0245706		0.0584347	0.0191625	0.0686234	0.0187304	0.104788	0.181182		0.0611114	0.0104939	0.0300565	-0.0572196	0.0758585	-0.0219605	0.0356671
58	38.86	0		-0.00497367	-0.0100134	0.0210221	-0.0898794	-0.0101776		0.0668706	-0.009031	0.0478608	0.0147374	0.0881382	0.124773		0.0233811	-0.014476	0.00998902	0.0332804	0.107264	-0.0211137	-0.00632263
59	39.53	0		-0.0257788	-0.0113022	-0.0171449	-0.114405	-0.0214196		0.0340994	-0.00912271	0.0688183	-0.027783	0.0733427	0.135865		-0.00201721	-0.0409813	-0.00727646	0.0300119	0.0451642	-0.0172966	-0.00719339
60	40.2	0		-0.0226164	0.0421534	0.0133268	-0.118547	0.00309234		-0.00386168	-0.00336114	0.032435	-0.0211731	0.0678939	0.0872835		-0.0151251	-0.0262937	0.0236643	0.058339	0.00696351	-0.0156363	0.030984
61	40.87	0		0.0258058	0.0679826	0.0121251	-0.126367	0.00750071		0.00707321	-0.0481505	0.0599065	-0.0351223	0.0251024	0.112155		0.0307262	-0.0536922	0.0385878	0.0104805	-0.0336557	0.0341326	0.0595545
62	41.54	0		-0.0148836	-0.0357988	0.0211474	-0.127154	0.0138112		0.021873	0.000174639	0.034057	-0.0321238	0.00756976	0.0699682		0.0116664	-0.0360858	0.122781	-0.0140224	0.0664828	0.000916227	0.0281362
63	42.21	0		0.016045	0.0702219	0.00990851	-0.0849407	-0.0143553		0.0140135	-0.00442444	0.0609267	-0.0624572	0.00342707	0.0373965		-0.0206597	-0.0403277	0.0875975	0.0357597	0.0640588	-0.0130547	0.0642955
64	42.88	0		-0.032967	-0.018195	-0.0120539	-0.0918767	0.00703736		0.0234573	-0.00505342	0.0235607	-0.0315127	0.0350249	0.0172513		0.024707	-0.0259899	0.0781255	-0.00715413	0.0413198	-0.0565472	0.0153891
65	43.55	0		-0.0325678	-0.0598414	0.0150891	-0.0994987	-0.00546276		-0.0303918	0.00641075	0.0202525	-0.0310241	0.0231654	0.015015		0.0425771	-0.024914	0.00903666	0.0111192	0.110444	0.0170202	-0.0160012
66	44.22	0		-0.0212297	-0.00417665	0.0708606	-0.117647	0.016565		-0.00328401	0.00988805	0.0198476	-0.0276835	0.0271969	-0.0277785		0.0226067	0.0157488	0.00757091	0.0776157	0.0837608	-0.026783	0.0190804
67	44.89	0		0.0101041	0.050464	0.0100336	-0.127926	0.0141309		-0.0355319	-0.00387833	0.0347445	0.00343242	0.0214112	-0.0146377		0.0156713	-0.0147304	0.0122014	0.00110705	0.0259813	-0.015084	0.0493338
68	45.56	0		-0.0396474	0.0315265	0.0685806	-0.139984	0.0051893		-0.0306793	-0.0291132	-0.010192	0.0152952	0.00436732	0.0472777		0.0459421	0.00232786	0.00364193	0.0524537	0.0424802	-0.0074886	-0.0847483
69	46.23	0		-0.0329506	0.0498858	0.010496	-0.149086	-0.0110245		-0.011633	-0.0351608	-0.018524	0.0161841	-0.0322857	0.00462355		-7.21758e-05	-0.0100426	0.0519489	0.0771302	-0.0111365	0.00398956	-0.0253251
70	46.9	0		-0.0205365	0.00649733	0.00531823	-0.179451	0.0473841		-0.00949546	-0.0352068	-0.0776988	-0.0265156	0.0183984	-0.00300149		0.0329524	0.0399197	0.0311272	0.0794849	0.0632533	-0.0129135	-0.027176
71	47.57	0		-0.00406365	0.0299054	0.0701184	-0.170679	-0.0100983		-0.00393637	-0.0603977	-0.0463445	-0.0730665	-0.0163506	0.0226047		-0.031169	-0.0155298	0.0272135	0.0623201	0.0252952	-0.0174552	-0.0274727
72	48.24	0		-0.0273634	0.002907	0.0519384	-0.17924	-0.00218331		0.000444425	-0.0219633	-0.0591011	-0.108974	-0.00489622	-0.0297062		-0.02481	0.00283721	-0.00578785	0.0295024	0.0953634	-0.0378749	0.0424738
73	48.91	0		-0.0457415	0.115374	0.0695252	-0.169343	0.0237637		-0.0151529	-0.0595901	-0.0141656	-0.11396	-0.0186822	0.0101831		-0.0026934	0.00405871	0.0902301	0.00756646	0.0310655	-0.0164636	-0.0365207
74	49.58	0		-0.0471764	0.042046	0.0409081	-0.162965	0.0079136		-0.00269347	-0.030355	0.0111161	-0.112624	-0.00645435	-0.0396673		0.00688645	-0.0173323	0.0316916	0.0474306	0.0131589	-0.0350904	0.028224
75	50.25	0		-0.0581128	0.0762858	0.0710758	-0.149001	-0.00934901		-0.0390856	-0.0118073	0.0358556	-0.0632883	-0.040604	-0.00751764		0.0196663	-0.0166149	0.0283627	0.00260699	0.0157344	-0.0295467	0.0160353
76	50.92	0		-0.03265	0.0657532	0.0622148	-0.148853	0.00726461		-0.0138621	-0.0188595	0.017738	-0.0482836	-0.0174125	-0.0223489		-0.0141195	0.010601	0.0389922	0.00181594	0.00742696	-0.0239575	0.0312697
77	51.59	0		-0.0771259	0.0907315	0.0554367	-0.137419	0.0345423		-0.0441782	-0.0138404	0.0247488	-0.0261227	-0.00965291	0.0144608		0.0418262	-0.0150757	0.0201549	0.0123303	0.0216543	-0.0286883	0.0322765
78	52.26	0		-0.00959424	0.0808862	0.0408555	-0.19512	0.0209255		-0.0124069	-0.0380798	0.014598	-0.0358339	0.00699095	-0.000671414		0.0338978	-0.0071171	-0.0295563	-0.020924	0.0493425	0.0518836	0.0648988
79	52.93	0		-0.0819415	0.0694743	0.0284804	-0.153741	0.00290265		-0.0127128	-0.0097409	-0.0650394	-0.0627494	-0.00208201	-0.0369752		0.0270668	-0.0184028	0.0276501	0.0170913	0.0860854	0.0114213	-0.0156517

## Sheet: ppk28_Dessicated
Taste responses of ppk28-GAL4				Fed									2 hour dessicated
Frame	Time (seconds)	Water taste stimulus		Fly1_fed_water	Fly2_fed_water	Fly3_fed_water	Fly4_fed_water	Fly5_fed_water	Fly6_fed_water	Fly7_fed_water	Fly8_fed_water		Fly1_2hrdess_water	Fly2_2hrdess_water	Fly3_2hrdesss_water	Fly4_2hrdess_water	Fly5_2hrdess_water
0	0	0		0.207251	0.0224902	0.0412432	0.0165715	0.165066	0.207675	0.527241	0.38107		0.0305205	0.226902	0.0828645	0.470369	0.126221
1	1.2	0		0.0785811	-0.0181989	0.0115319	0.000889847	-0.0389829	0.10271	0.144906	0.0866162		0.0167668	0.113273	0.0178404	0.107783	0.0178234
2	2.4	0		0.0745297	-0.0251302	0.0142823	-0.011566	-0.0607989	0.068871	0.0803206	0.054815		0.0124019	0.106547	-0.00382892	0.0757727	0.013912
3	3.6	0		0.0745307	-0.0358331	0.00667135	-0.00983339	-0.0776798	0.058268	0.0611298	0.0448349		0.00980422	0.0875791	-0.00654255	0.0804675	0.00852372
4	4.8	0		0.0668964	-0.0197918	0.00295566	0.00108196	-0.0846664	0.0483888	0.0396708	0.0241643		0.00645122	0.0625821	0.0040248	0.0566411	0.00400576
5	6	0		0.0536663	-0.0302269	-0.00944784	-0.0131796	-0.0797284	0.0229581	0.0379697	0.0325811		0.00319999	0.05249	-0.00116841	0.0627133	-0.00653466
6	7.2	0		0.0518416	-0.031289	0.00646704	0.00318107	-0.0811763	-0.0193244	0.0374605	0.0236647		-0.00188852	0.0305822	-0.00190514	0.0416495	0.00648293
7	8.4	0		0.0361883	-0.0254508	-0.000869947	-0.000708157	-0.0636872	0.00634754	0.0310765	0.0230366		0.00454624	0.0329175	0.00661166	0.0445969	-0.00742421
8	9.6	0		0.0236729	-0.031199	-0.00796134	-0.0105941	-0.0439867	0.0286126	0.0157238	0.0218997		-0.000420993	0.0387843	0.00751851	0.0179714	-0.00383982
9	10.8	0		0.0127648	0.00314773	-0.000679583	0.0125563	-0.0350423	0.011855	0.0169428	0.0177097		0.00073732	0.0281257	0.00855149	0.029415	-0.00475537
10	12	0		0.0169436	0.00165992	0.00308537	-0.0078922	-0.00770429	0.00265238	0.00992993	0.0134875		0.00166782	0.0249472	0.00449126	0.0360823	0.00343208
11	13.2	0		0.0112978	-0.00266603	-0.0177364	0.00321431	0.00940032	0.0342848	0.0100457	0.0130887		0.00638341	0.0168686	0.0178675	-0.000534905	-0.00273935
12	14.4	0		0.0200348	0.0053914	-0.00338267	-0.000579024	0.000907064	0.0173506	0.00185629	-0.00176445		-0.00191743	0.0029391	0.00992027	-0.00967653	0.00307915
13	15.6	0		0.00658625	0.00961376	-0.00564098	-0.000716606	0.00906119	0.0193924	0.00333755	0.00437393		0.00162887	-0.00783321	0.0108243	-0.0155532	0.00408714
14	16.8	0		-0.00542338	-0.0155199	0.0066842	-0.015877	0.0154466	-0.0130815	-0.00976234	-0.0215594		-0.000915071	-0.0142366	0.00857659	0.000927229	0.0039514
15	18	0		-0.0116723	-0.015404	0.00636076	0.0178206	0.010484	0.00216401	-0.00714314	-0.0122717		-0.0103646	-0.00898716	-0.0161712	-0.0130684	-0.00188566
16	19.2	0		-0.0254917	0.00824794	0.00396914	-0.00739924	0.00403842	-0.0239786	-0.0159034	-0.00548231		0.00114308	-0.016366	-0.015296	-0.00376469	-0.00144822
17	20.4	0		-0.0250398	0.00552924	0.00734017	-0.00112723	-0.00659098	-0.0506391	-0.00930331	-0.00758192		0.00163658	-0.0254576	-0.0287643	-0.0238267	-0.00372116
18	21.6	0		-0.0103248	-0.0212261	0.00510219	0.0341047	-0.00981415	-0.0541695	-0.0147693	-0.0146372		-0.0111129	-0.0297877	-0.012717	-0.017013	-0.0103813
19	22.8	0		0.0649454	0.0748906	0.462083	0.0265731	-0.0358129	-0.0782292	0.22631	0.125711		0.225804	-0.0295537	0.00607637	-0.0150982	0.0617448
20	24	1		0.123693	0.606533	0.564791	0.731905	0.628594	-0.0477324	0.287581	0.15566		0.402427	-0.0321606	0.00425768	0.897384	0.0792025
21	25.2	1		0.132494	0.619454	0.570126	0.837939	0.840488	-0.0254261	0.324285	0.150471		0.428297	0.272829	0.216039	1.10597	0.159754
22	26.4	1		0.178374	0.686673	0.551547	0.854188	0.757614	-0.0492093	0.262172	0.126949		0.408322	0.305893	0.250448	1.05766	0.204905
23	27.6	1		0.152629	0.610865	0.558071	0.821632	0.676187	0.165969	0.220431	0.0999474		0.387886	0.327783	0.206853	1.01519	0.220377
24	28.8	1		0.129193	0.532734	0.567135	0.803114	0.560561	0.535349	0.200141	0.0651205		0.331542	0.391603	0.17833	0.929241	0.209299
25	30	1		0.126255	0.349475	0.274062	0.678802	0.372458	0.575307	0.109032	0.0743212		0.2119	0.375508	0.193507	0.946716	0.109038
26	31.2	0		0.109169	0.166829	0.132008	0.343138	0.171621	0.2764	0.0451754	0.0178518		0.12652	0.350196	0.10129	0.696318	0.0432139
27	32.4	0		0.0218839	0.0992094	0.0849345	0.215812	0.0724325	0.119132	0.0172899	-0.00391907		0.0947854	0.129926	0.0622606	0.397143	0.00802197
28	33.6	0		-0.0152007	0.0851729	0.0354796	0.145904	0.0158351	0.0621044	-0.00144954	0.0289137		0.0558692	0.0447292	0.0448835	0.202876	0.000732662
29	34.8	0		-0.0550029	0.0468647	0.0208312	0.0978898	-0.000802486	0.0378446	-0.00382959	0.00782132		0.0370597	-0.00215139	0.0357778	0.126789	-0.00426523
30	36	0		-0.047519	0.0350167	0.00917329	0.0513438	-0.0275506	0.00697712	-0.00567345	-0.0111714		0.0242734	-0.0321635	0.0224024	0.0733418	-0.0278213
31	37.2	0		-0.0705703	0.0196878	0.00953193	0.0519587	-0.0572932	-0.0290389	-0.0161464	-0.00835208		0.0100371	-0.0346125	0.00623407	0.00987035	-0.0267219
32	38.4	0		-0.0617091	0.0156202	-0.00297218	0.0545413	-0.0806471	-0.0305687	-0.0175235	-0.0129226		-0.000586054	-0.0342668	0.0180995	-0.011931	-0.0286295
33	39.6	0		-0.0622236	0.0275877	-0.0242757	0.0498262	-0.0893509	-0.0421838	-0.0203356	-0.00848961		-0.000358807	-0.0510317	0.0148123	-0.00135895	-0.0288476
34	40.8	0		-0.0725269	0.0128371	-0.0147276	0.0140443	-0.116186	-0.0661611	-0.0117759	-0.0175711		-0.00612119	-0.0711439	0.0144189	-0.0201482	-0.0325831
35	42	0		-0.0592135	-0.00243145	-0.020658	-0.00328083	-0.108176	-0.0509686	-0.0199151	-0.0272807		-0.00995289	-0.0693116	0.0250037	-0.0370395	-0.0274431
36	43.2	0		-0.0727883	-0.015225	-0.0272374	0.0156363	-0.120458	-0.0664553	-0.0151705	-0.024796		-0.0202144	-0.0909098	0.0190437	-0.0280192	-0.021932
37	44.4	0		-0.0663137	-0.00686799	-0.0219134	-0.0156266	-0.127387	-0.0581118	-0.0267081	-0.015687		-0.0135511	-0.10429	0.0288478	-0.0238285	-0.026657
38	45.6	0		-0.0625161	-0.017459	-0.0132242	0.00320295	-0.137907	-0.080265	-0.0247562	-0.0184696		-0.0170881	-0.0785246	0.0378878	-0.0322453	-0.0362329
39	46.8	0		-0.0966451	-0.0166723	-0.0311035	0.00924188	-0.145434	-0.088232	-0.012154	-0.0281929		-0.0236836	-0.0905375	0.0384581	-0.0475911	-0.0445755
40	48	0		-0.0969188	-0.0165753	-0.0240422	-0.00955216	-0.136729	-0.0935747	-0.0174657	-0.0387047		-0.0203515	-0.0948071	0.0477592	-0.0563963	-0.039517
41	49.2	0		-0.0874017	-0.0389562	-0.00930842	-0.0213813	-0.147161	-0.0813536	-0.0261334	-0.0251031		-0.0203446	-0.107837	0.0487394	-0.0628177	-0.0437665
42	50.4	0		-0.104155	-0.061002	-0.0239824	-0.013245	-0.163363	-0.0812124	-0.0210145	-0.00383655		-0.0193515	-0.111919	0.0240689	-0.0631566	-0.0395623
43	51.6	0		-0.104675	-0.0773583	-0.0288727	-0.00878165	-0.162766	-0.0763875	-0.0211457	-0.0192673		-0.0132264	-0.106136	0.0104398	-0.0626457	-0.0444295
44	52.8	0		-0.112371	-0.0830063	-0.033807	-0.00770929	-0.170089	-0.116252	-0.0172998	-0.0183504		-0.025475	-0.118061	0.0136047	-0.0541178	-0.0394337
45	54	0		-0.104985	-0.0740899	-0.0191326	-0.0274751	-0.175282	-0.195109	-0.0244708	-0.00875092		-0.026139	-0.114012	0.0269908	-0.062154	-0.0465668
46	55.2	0		-0.118674	-0.073656	-0.02378	-0.0101692	-0.184303	-0.201752	-0.0171841	-0.0406026		-0.0326445	-0.114784	0.0208831	-0.07804	-0.0405514
47	56.4	0		-0.114774	-0.0504489	-0.0260426	-0.00181409	-0.165576	-0.178699	-0.00245634	-0.0373065		-0.0319624	-0.127201	0.0182076	-0.0653229	-0.0515085
48	57.6	0		-0.115462	-0.0338362	-0.026066	0.00412371	-0.170803	-0.134521	-0.00716242	-0.044976		-0.0240327	-0.123654	0.033289	-0.0568149	-0.0564012
49	58.8	0		-0.130027	-0.0452806	-0.0276593	-0.00197529	-0.174982	-0.121024	-0.00595118	-0.0503626		-0.036911	-0.131993	0.0303201	-0.0747449	-0.0524453
50	60	0		-0.130594	-0.0387976	-0.0243819	-0.0172761	-0.173186	-0.102936	-0.0147925	-0.0404834		-0.0350518	-0.141242	0.0305575	-0.0830496	-0.0595038
51	61.2	0		-0.140625	-0.0555301	-0.0267118	-0.021531	-0.169615	-0.124789	-0.023977	-0.0414095		-0.0332526	-0.124391	0.0391063	-0.0772567	-0.0556107
52	62.4	0		-0.125702	-0.08229	-0.022588	-0.0150929	-0.172037	-0.120965	-0.0187309	-0.0301046		-0.0360031	-0.126465	0.0428297	-0.0640357	-0.0614978
53	63.6	0		-0.124907	-0.107543	-0.0235985	-0.0185776	-0.173658	-0.197827	-0.0111896	-0.0460167		-0.0266535	-0.116306	0.044663	-0.0885906	-0.0502446
54	64.8	0		-0.125717	-0.0975473	-0.0325685	-0.00689588	-0.182519	-0.252602	-0.010449	-0.0468739		-0.0406163	-0.127544	0.015241	-0.0852386	-0.0451482

## Sheet: ppk28_Psuedodessicated
Water taste responses of ppk28-GAL4				1 hour low osmolality AHL											1 hour high osmolality AHL (Pseudodessicated)
Frame	Time (seconds)	Water taste stimulus		Fly1_1hrregAHL_water	Fly2_1hrregAHL_water	Fly3_1hrregAHL_water	Fly4_1hrregAHL_water	Fly5_1hrregAHL_water	Fly6_1hrregAHL_water	Fly7_1hrregAHL_water	Fly8_1hrregAHL_water	Fly9_1hrregAHL_water	Fly10_1hrregAHL_water		Fly1_pseudodess_water	Fly2_pseudodess_water	Fly3_pseudodess_water	Fly4_pseudodess_water	Fly5_pseudodess_water	Fly6_pseudodess_water	Fly7_pseudodess_water	Fly8_pseudodess_water	Fly9_pseudodess_water	Fly10_pseudodess_water
0	0	0		0.0103976	0.0632848	0.346204	0.213066	0.250828	0.423418	0.148319	0.00154964	0.116622	0.233163		0.142748	0.399221	0.492561	-0.0454843	0.328533	0.328068	0.327967	0.229036	0.0021499	0.119114
1	1.2	0		0.00191894	-0.00891794	-0.00334466	0.0454495	0.0312227	0.132271	0.016812	0.03425	0.020552	0.097131		0.059628	0.150462	0.255984	-0.00914048	0.120571	0.0414219	0.0763764	0.0134448	-0.00496788	-0.00305397
2	2.4	0		0.00395095	-0.0164213	-0.0190012	0.0359167	0.0204033	0.0867201	0.0109647	0.0218579	0.0126996	0.0826672		0.0397557	0.0596833	0.188598	-0.0499695	0.08483	-0.0256987	0.0376332	-0.00886575	0.0544563	-0.00893689
3	3.6	0		-0.00389372	-0.00884903	-0.000671559	0.0391918	0.0264941	0.0623088	0.000917274	0.0201247	0.0112232	0.0678544		0.0296301	0.0361252	0.156342	-0.0532341	0.0628776	-0.00982811	0.0766951	0.00251283	0.0405018	0.00301104
4	4.8	0		-0.00348863	-0.0054428	0.000816377	0.00338917	0.0197277	0.0303675	0.0249304	0.0251747	0.014236	0.0583418		0.00762357	0.0464859	0.106825	-0.0454525	0.0521507	-0.0285063	0.0605176	-0.0331037	0.0279892	-0.00527872
5	6	0		-0.018472	0.00340653	0.0335575	0.0144442	0.0420541	0.00131947	0.000124579	-0.01564	0.00710755	0.0519602		0.000596321	0.0162085	0.0702751	-0.0594972	0.0416267	-0.0141975	0.0648747	-0.0180166	0.0133788	-0.0160979
6	7.2	0		0.00689473	-0.00838155	0.0137528	0.0143209	0.0235505	-0.00137391	0.0306699	-0.0148828	0.00683946	0.0341484		0.018966	0.0300514	0.0594886	-0.0567459	0.0343209	0.00442656	-0.00261485	0.0181961	0.0256405	-0.000506092
7	8.4	0		-0.0105656	0.00186086	-0.0285748	0.0313569	0.0244038	-0.000821279	0.0377606	0.0413501	0.00524347	0.028658		0.0170987	0.0328616	0.0344873	-0.0557617	0.0371678	-0.0147392	0.0281216	0.00101027	0.0032297	9.72314e-05
8	9.6	0		-0.0122492	-0.000669147	0.00141382	0.0161796	0.011878	0.0149548	0.0141087	0.0184355	0.0111346	0.0252226		0.0252554	0.00535155	0.0686649	-0.0239274	0.0215356	-0.0323792	0.00947265	0.0124357	0.00333638	-0.0033304
9	10.8	0		-0.00693044	0.0185132	-0.00326209	0.0175738	-0.00814684	0.024516	-0.00448636	0.0146896	-0.000872034	0.0311717		0.0359757	0.0117889	0.00675049	-0.0355695	0.0310506	-0.0158225	0.0516143	-0.0135211	0.00940201	-0.00666061
10	12	0		-0.00757149	0.00579485	-0.0355579	0.00740379	-0.00094587	0.00457065	0.0344613	-0.00181388	0.00592291	0.0175462		0.0133428	0.0216819	0.0308687	-0.0191062	0.0582505	-0.0210766	0.037218	-0.0575075	0.00832046	-0.0143168
11	13.2	0		-0.00683058	0.0120105	-0.0199289	0.00881007	-0.00638518	0.0328439	0.0381799	0.006522	0.00318399	0.00693284		0.0178502	0.0374588	0.0343315	-0.00485777	0.0300475	-0.0017935	0.0765192	0.0259574	0.012846	-0.000492215
12	14.4	0		-0.019118	0.00132903	0.026712	-0.000598195	0.00509881	0.0106157	0.0457923	0.0160077	0.00314654	0.00721633		0.0140129	0.00229625	-0.000261632	-0.0124386	-0.00685296	-0.0166079	-0.0168102	-0.0106561	0.00522762	0.00336645
13	15.6	0		0.00022167	-0.000197526	-0.0153097	0.00625204	-0.00306443	0.0125125	-0.00798374	0.00182915	0.0072292	-0.00095297		0.0163869	-0.0197383	0.00108885	-0.0056958	-0.0188613	-0.00278654	-0.0498541	0.00858139	-0.00202873	-0.00499929
14	16.8	0		0.00441453	-0.0112491	0.00445122	-0.000909007	-0.0144145	-0.0288244	-0.00581484	-0.0114838	0.000922894	-0.00329549		-0.0108514	-0.0213803	-0.0180257	0.0153675	-0.0308348	0.00485086	-0.014463	-0.0123705	0.00781367	0.00861419
15	18	0		0.00515177	-0.0148587	0.0249828	-0.00937369	0.0231409	-0.042326	-0.0245618	0.0022975	-0.00683998	-0.0150422		-0.0191969	0.0220353	0.00920906	0.00919084	-0.0244509	0.0245221	-0.0435254	0.0226608	-0.00383986	0.00326741
16	19.2	0		0.0101612	0.00421316	0.0104305	-0.00152292	0.0149714	-0.00604525	-0.0361823	-0.0191213	-0.00372258	-0.021102		-0.02475	-0.0170976	-0.0349067	0.0303509	-0.0201949	0.0206583	-0.0204321	0.0201898	-0.0122398	0.00348668
17	20.4	0		0.0205014	-0.0155554	0.00748214	-0.0276359	-0.0102542	-0.0078631	-0.0394044	-0.00892701	-0.00897094	-0.0224744		-0.0427702	-0.0370449	-0.0290546	0.0227587	-0.0181539	0.00805568	-0.0202668	0.0166658	-0.0255013	0.00773415
18	21.6	0		0.00650807	-0.0164883	0.0500883	-0.0812067	-0.00539784	-0.0355363	-0.0284229	0.0186879	-0.0118764	-0.0365544		0.0820262	-0.0185824	0.0016429	-0.0218105	-0.0263527	0.0163611	-0.0418024	-0.0137667	-0.0224808	-0.0120619
19	22.8	0		0.474731	-0.013363	0.179118	-0.0556754	0.587643	0.18968	0.0234411	0.26272	0.00829161	0.0696995		1.63253	-0.0164318	0.310834	0.0128897	-0.00745019	0.00712583	0.131752	0.432334	-0.0169314	0.136017
20	24	1		0.404228	0.0187769	0.795987	0.337915	0.884861	0.430591	0.612164	0.312262	0.452503	0.264885		1.80262	0.668625	1.95236	1.31327	0.219357	1.70733	0.357424	1.23074	0.490597	0.529905
21	25.2	1		0.419946	0.217697	1.11319	0.495183	0.811695	0.624569	0.887308	0.315431	0.563955	0.203864		1.75131	0.83739	2.02155	1.69374	0.267425	2.0397	0.404126	1.42405	0.449417	0.561497
22	26.4	1		0.377088	0.423366	0.971777	0.596913	0.813276	0.599497	0.947771	0.261458	0.545889	0.153117		1.74377	1.20812	2.19819	1.77137	0.489564	2.10403	0.699785	1.63913	0.463756	0.609228
23	27.6	1		0.380566	0.331416	0.66056	0.625662	0.788725	0.643846	0.984987	0.239915	0.503191	0.129336		1.59476	1.10626	2.13355	1.79757	0.462851	1.79096	0.779411	1.73586	0.485688	0.702936
24	28.8	1		0.286086	0.275183	0.501037	0.512732	0.735632	0.74503	0.873757	0.266246	0.465137	0.14325		1.57483	0.998431	2.0707	2.26602	0.311121	1.31456	0.797168	1.86485	0.381866	0.978665
25	30	1		0.214087	0.178603	0.351132	0.285075	0.493499	0.798552	0.512255	0.213596	0.417554	0.180123		0.938191	1.18692	1.43383	1.4795	0.254222	1.09529	0.572084	1.30716	0.324243	0.828708
26	31.2	0		0.224575	0.106095	0.263593	0.17229	0.35701	0.646593	0.279386	0.113275	0.250356	0.101974		0.59497	0.890455	0.812123	0.884997	0.171463	0.809369	0.385836	0.852203	0.264239	0.579194
27	32.4	0		0.200991	0.0562969	0.214615	0.107597	0.261902	0.565771	0.158886	0.0846037	0.127208	0.0483856		0.39446	0.659661	0.513147	0.554046	0.104005	0.85662	0.262553	0.556484	0.127546	0.393742
28	33.6	0		0.202583	0.0196722	0.170937	0.0998561	0.19915	0.317753	0.107659	0.0511761	0.0727159	0.0148966		0.26031	0.58344	0.332511	0.411486	0.0588883	0.788497	0.167076	0.393659	0.0667667	0.301279
29	34.8	0		0.201991	0.0228242	0.156556	0.0713684	0.144408	0.190782	0.0596589	0.0809841	0.0235937	-0.00434301		0.191539	0.432635	0.201462	0.279378	0.00671509	0.705054	0.128031	0.261977	0.00844152	0.23712
30	36	0		0.17034	0.006981	0.16907	0.0997229	0.0794078	0.127168	0.015048	0.0647797	-0.00226536	-0.018169		0.132262	0.452358	0.163822	0.201385	-0.014901	0.692136	0.0945216	0.20639	0.00496996	0.175625
31	37.2	0		0.154218	-0.0172721	0.137093	0.0775655	0.0651787	0.0781969	0.0162646	0.0565074	-0.0215605	-0.0288482		0.110578	0.351637	0.086983	0.151683	-0.0187395	0.539649	0.0646367	0.140443	-0.0246756	0.141649
32	38.4	0		0.145021	-0.00862074	0.139405	0.0745181	0.0601676	0.0516965	0.0247413	0.0362842	-0.034	-0.0398607		0.0765696	0.384416	0.0330849	0.120903	-0.0193251	0.471734	0.0645164	0.093336	-0.0610227	0.117231
33	39.6	0		0.106448	-0.016386	0.0934279	0.0625401	0.0236146	0.0282699	0.000128402	0.0318709	-0.0432385	-0.0468811		0.0518638	0.279851	-0.0164674	0.0996423	-0.0468208	0.377585	0.0205909	0.0472795	-0.0426389	0.101983
34	40.8	0		0.0840869	-0.0103518	0.0630474	0.046955	-0.000347474	7.68261e-05	-0.00991639	0.0105063	-0.047814	-0.0543294		0.0300011	0.308803	-0.0229601	0.135624	-0.0517551	0.337791	0.0216752	0.0111559	-0.0605006	0.0938834
35	42	0		0.0906166	-0.0224097	0.0487542	0.0514745	-0.000364931	-0.0339045	-0.00943599	0.00808224	-0.050396	-0.0479623		0.0377958	0.32784	-0.0262671	0.13612	-0.0739627	0.305923	0.0608389	0.0506215	-0.086815	0.0916178
36	43.2	0		0.0719938	-0.0389954	0.0469505	0.038586	0.00168175	-0.0564422	-0.0311787	-0.00905695	-0.0443687	-0.0649473		0.04177	0.363017	-0.0480653	0.0760164	-0.0744845	0.298412	0.0790819	0.0658581	-0.0955068	0.0760415
37	44.4	0		0.0504999	-0.0311349	0.0561097	0.0414673	-0.0321093	-0.0529651	-0.0167152	0.0116168	-0.0526675	-0.0587605		0.0174103	0.312751	-0.101184	0.0756969	-0.0612122	0.290838	0.107106	0.106553	-0.106512	0.0563142
38	45.6	0		0.0715298	-0.0363635	0.0285496	0.0345723	-0.0418622	-0.0520306	-0.036647	0.0121983	-0.0590672	-0.0657784		0.0197202	0.302925	-0.0938778	0.0421456	-0.0584754	0.259142	0.0456862	0.0429422	-0.117162	0.0396285
39	46.8	0		0.0532977	-0.0409421	0.102061	0.025081	-0.044459	-0.0262838	-0.0469015	-0.00011997	-0.0636303	-0.0697339		0.0118017	0.240098	-0.0979985	0.0317758	-0.098246	0.286911	-0.00131235	0.0717333	-0.0980243	0.0331784
40	48	0		0.0427508	-0.0479552	0.107603	0.0296784	-0.0623499	-0.0292036	-0.0156313	-0.0147015	-0.0619791	-0.0713036		0.00715266	0.224803	-0.122723	-0.000548556	-0.0887716	0.247072	-0.00896869	0.0274977	-0.0756105	0.0299969
41	49.2	0		0.0530694	-0.0365408	0.0858587	0.0507266	-0.0582855	-0.0577643	-0.051892	-0.00704613	-0.0564635	-0.0711442		0.0036707	0.249309	-0.128661	0.0129162	-0.0972951	0.241637	-0.00221815	0.0398663	-0.0723812	0.0287868
42	50.4	0		0.0579672	-0.0515583	0.0471545	0.048131	-0.0710554	-0.0336201	-0.0497899	0.0123292	-0.0640569	-0.0678122		0.00190228	0.238621	-0.13131	0.0102942	-0.100618	0.202475	-0.0149364	-0.0243919	-0.087175	0.0121252
43	51.6	0		0.0353782	-0.0456217	0.0361399	0.0490158	-0.0621534	-0.0496066	-0.0827869	0.0214167	-0.0619692	-0.0580593		-0.00699049	0.229243	-0.139829	0.0221367	-0.0978923	0.262735	-0.00118011	-0.0489859	-0.115297	0.0182507
44	52.8	0		0.0293793	-0.049271	0.0601412	0.0261843	-0.0683161	-0.065226	-0.100364	0.033763	-0.0704485	-0.0642787		-0.0312811	0.218923	-0.115157	0.0304617	-0.107454	0.219456	-0.0130534	-0.0284494	-0.112552	0.00709292
45	54	0		0.036036	-0.0400327	0.0257049	0.0191616	-0.0803084	-0.100965	-0.0830971	0.023234	-0.0665366	-0.0728743		-0.0287441	0.178197	-0.173868	-0.00565614	-0.121219	0.242396	-0.0343814	-0.0305161	-0.130204	-0.000583402
46	55.2	0		0.0344976	-0.0429665	0.0117339	0.0286185	-0.0960361	-0.0722514	-0.0904968	0.0197227	-0.0791253	-0.0732993		-0.0219589	0.174515	-0.171409	0.0269124	-0.115113	0.216829	-0.0579865	-0.0175663	-0.111695	-0.0147956
47	56.4	0		0.0166822	-0.0456929	0.0411024	0.0152942	-0.0702603	-0.0777225	-0.0671853	0.00463458	-0.0689126	-0.073041		-0.0301221	0.149133	-0.14949	-0.0170816	-0.119874	0.231752	-0.025215	-0.019494	-0.0672489	-0.00744741
48	57.6	0		0.00507649	-0.0310683	0.0274454	0.0222792	-0.0869156	-0.0800143	-0.0818294	0.00442611	-0.0566528	-0.0778201		-0.0132294	0.151302	-0.159445	-0.00487073	-0.111443	0.230822	-0.0301605	-0.0118841	-0.0580931	0.00977885
49	58.8	0		0.0184157	-0.0443073	0.0186587	0.0318711	-0.0796934	-0.100148	-0.0848533	-0.0120204	-0.0684619	-0.0753714		-0.0199195	0.128156	-0.1453	-0.0225548	-0.113913	0.241791	-0.0365805	-0.00269423	-0.058643	0.00555395
50	60	0		0.0445673	-0.0482044	0.0274487	0.0158233	-0.0884732	-0.132097	-0.0734126	-0.0256605	-0.0698281	-0.0791052		-0.0241945	0.0742451	-0.177227	-0.00147597	-0.124182	0.188004	-0.0419915	-0.0117759	-0.0622726	-0.0118616
51	61.2	0		0.039942	-0.0507582	0.00497094	0.0200796	-0.0899525	-0.119683	-0.076082	0.00423447	-0.0837264	-0.0747288		-0.0136997	0.106113	-0.191113	-0.020745	-0.121526	0.215051	-0.0292402	-0.0626688	-0.0558529	-0.0210556
52	62.4	0		0.0260361	-0.0514808	0.0467352	0.0123348	-0.106437	-0.100498	-0.0876182	0.0138959	-0.0817261	-0.0748648		-0.00221773	0.0731055	-0.197796	-0.0313574	-0.12787	0.242134	-0.0266457	-0.0461609	-0.0839102	-0.0219363
53	63.6	0		0.0243434	-0.0474889	0.0449315	0.00419532	-0.0871472	-0.113699	-0.100192	-0.00431549	-0.0774653	-0.0733565		-0.0272772	0.0929629	-0.222399	-0.0103339	-0.121497	0.233585	-0.0655582	-0.00640693	-0.0913536	-0.0326686
54	64.8	0		0.0464478	-0.0682696	0.057154	-0.00332206	-0.128014	-0.112013	-0.0874725	-0.0080866	-0.0758452	-0.075511		-0.0264383	0.0699011	-0.203423	0.00584874	-0.125075	0.24393	-0.0674809	-0.0523582	-0.0948429	-0.0292112

## Sheet: 20210803_SS48947_Clavicle
Taste responses of Clavicle (SS48947) in pseudodessicated animals
Frame	Time (seconds)	Taste stimulus	20210727_Fly1_water	20210727_Fly1_sugar	20210727_Fly1_bitter	20210727_Fly2_water	20210727_Fly2_sugar	20210727_Fly2_bitter	20210727_Fly3_water	20210727_Fly3_sugar	20210727_Fly3_bitter	20210727_Fly4_water	20210727_Fly4_sugar	20210727_Fly4_bitter	20210727_Fly5_water	20210727_Fly5_sugar	20210727_Fly5_bitter	20210803_Fly6_water	20210803_Fly6_sugar	20210803_Fly6_bitter	20210803_Fly7_water	20210803_Fly7_sugar	20210803_Fly7_bitter
0	0	0	-0.143362	0.00614155	-0.00665109	0.0506598	0.0134604	0.00136956	-0.0294527	-0.00637606	0.0095829	0.071806	0.0211402	0.0116573	0.127206	-0.0111706	-0.00726883	0.0515404	0.0204401	0.0634513	-0.0511673	0.0649982	-0.0409526
1	1.2	0	-0.0436627	-0.00856334	-0.0268225	0.0681099	-0.0163277	0.0171219	0.0132962	-0.00959245	-6.77391e-05	0.023961	0.0154874	0.0128639	0.104885	-0.0210452	0.0233029	0.0260362	-0.00717779	0.0297954	0.0174364	0.0228989	-0.00989601
2	2.4	0	-0.0204604	-0.00992048	-0.00250969	0.0552494	0.00541734	0.0119577	0.0106941	0.00884407	0.00286601	0.0169544	0.00933653	0.0102559	0.120723	0.000259217	0.0953934	0.0177051	0.00362855	0.0232811	0.0511698	0.0199904	0.0132133
3	3.6	0	-0.0258754	0.0108727	0.00231321	0.0459271	-0.00544491	0.00255769	0.0185521	0.0182632	0.0277362	0.00573233	0.012182	0.00725096	0.0831692	-0.000846722	-0.0299667	-0.00597245	0.00624664	0.0210469	0.0195613	-0.00798036	0.0209995
4	4.8	0	-0.0252562	-0.00250936	0.00708115	0.0419072	0.00221094	-0.0136445	0.0244519	0.02004	0.029265	0.00643152	0.00393472	0.00944822	0.101287	0.00176934	0.0363981	-0.00215118	-0.00126493	0.0400127	0.0119403	0.0441177	0.00700319
5	6	0	-0.021012	0.00620133	-0.00676173	0.032536	-0.00479884	-0.0167348	0.0150292	0.0207895	0.0279059	0.0025854	0.00421966	0.012449	0.0653824	0.0192589	-0.0573775	-0.0334668	0.00346336	0.00913751	0.00473577	0.0202137	-0.00225745
6	7.2	0	-0.0252112	0.0340182	-0.00559535	0.0162804	-0.0197939	-0.00388602	0.00894426	0.0159452	0.00882888	0.0059152	0.00666643	0.00522774	0.011364	0.00574433	-0.0606886	-0.0310636	-0.0100629	-0.00832748	-0.00200494	0.0105148	0.0139203
7	8.4	0	0.00609671	0.011052	-0.0129472	0.0120763	-0.0271405	-0.0153981	0.0154858	0.00235182	0.0115324	0.0071916	0.00831724	0.0114618	0.0398222	-0.00481147	0.0558141	-0.00803586	-0.00463898	-0.00598235	0.00650342	-0.000462351	0.00625455
8	9.6	0	-0.0160248	-0.00554022	-4.34216e-05	0.00160609	-0.0121228	-0.0167794	0.00242134	-0.00872841	0.00082364	0.00373958	0.00841175	0.00335989	0.0108144	-0.01699	0.0298481	-0.00764265	-0.00231781	0.0016182	0.0118501	0.00351684	-0.000585614
9	10.8	0	-0.0143812	-0.000929726	-0.000105267	-0.0106027	-0.00682164	-0.00479154	0.00670226	-0.00275682	0.0194323	-0.00225713	-0.000501461	0.00343716	0.0500809	-0.00876177	0.0358128	-0.0224456	0.00705421	-0.00439923	0.023399	0.0108951	-0.018701
10	12	0	0.00481333	-0.0226483	-0.0182528	-0.0086172	-0.0198263	-0.00650622	0.0055947	-0.00721474	0.00614512	0.00730589	0.00924728	-0.00185303	0.0223653	-0.010593	0.0221859	0.00616875	0.00113681	0.000788392	0.0119245	0.0113415	-0.00151406
11	13.2	0	-0.00105198	-0.00153081	-0.00220716	0.00123481	-0.0150912	0.0303616	0.00414967	-0.00376971	0.00978161	-0.00232268	-0.00324668	-0.00192781	-0.0192532	0.00029054	-0.0228879	-0.017859	0.00883597	-0.00880522	0.00993237	-0.0021824	0.00306581
12	14.4	0	-0.0062193	-0.00376355	0.00872179	-0.00698669	-0.0225807	0.0106424	-0.00268932	0.0177867	0.00451171	-0.0122599	0.00453339	-0.00206035	-0.0360725	0.0384135	0.0499723	-0.00101032	0.0228969	0.014062	-0.00795346	-0.000938461	0.0047983
13	15.6	0	0.0027419	0.0151301	0.0181061	-0.0055703	-0.00366088	0.00296632	-0.0177122	0.00153102	0.000403464	0.00288903	-0.000226871	0.00167934	-0.0189159	0.0195294	0.00479324	0.000594642	0.00176618	0.00811615	0.0115004	7.87268e-05	0.0158789
14	16.8	0	-0.00458692	0.00076282	0.0164046	-0.00631835	0.0191972	-0.00328257	-0.0103355	0.0135314	-0.00472254	0.00184128	-0.00057364	-0.00012677	0.0464522	-0.000388323	-0.0217591	0.00273877	-0.000197828	0.00919197	-0.0247439	-0.017735	0.0154283
15	18	0	0.00160486	0.00200483	0.0114942	-0.000175842	0.0311673	-0.00545644	-0.00204803	-0.000569353	0.00307711	0.000934492	-0.00240272	0.0022674	-0.0240009	-0.0125193	0.0192016	0.00551249	-0.00987307	-0.00635564	0.000796599	0.00715342	0.0114402
16	19.2	0	-0.000815564	-0.00910132	-0.00547712	0.0203543	0.01462	-0.00389599	-0.00130485	-0.00223417	-0.0274785	0.00703265	-0.00337891	0.0011409	0.0243172	-0.022024	-0.0390659	0.0120486	-0.00148789	-0.00209791	-0.00768404	-0.000821457	-0.00288308
17	20.4	0	0.0178949	0.020076	-0.0286844	0.016682	0.00299621	-0.0200376	0.0176433	-0.0163043	-0.0111503	-0.00316368	-0.0034504	-0.00255682	-0.0449732	-0.00394708	-0.0482529	0.0142516	-0.0301313	-0.0105005	-0.0171715	-0.00779145	-0.0275133
18	21.6	0	0.0231523	0.00527812	0.00215673	0.016894	-0.0223145	-0.00254578	0.0187451	0.0150322	-0.014937	0.000300606	-0.00134103	-0.000951325	-0.0193656	0.00159225	-0.0346777	0.0181043	-0.0223469	0.0135217	0.00684865	0.00433923	-0.00575078
19	22.8	0	0.051049	0.0470471	-0.00783509	0.00183215	0.0381559	0.0243416	0.0241511	0.144885	-0.00740451	0.00514002	0.138185	-0.00802328	0.0116391	0.193048	0.00844191	0.297811	-0.0136377	0.00124928	0.535747	0.0354646	0.00561692
20	24	1	0.231635	0.199715	-0.0158713	0.405883	0.161358	0.0249088	0.125389	0.0773955	-0.00870755	0.0738345	0.109573	-0.000358195	0.724642	0.167449	0.0796417	0.202816	0.116047	-0.019797	0.538791	0.891958	0.0091053
21	25.2	1	0.105919	0.134096	-0.016701	0.237636	0.102245	0.00431108	0.0799344	0.0404017	-0.00193956	0.0590394	0.050778	-0.00102875	0.378876	0.0627194	0.0506679	0.109092	0.290222	-0.0112226	0.315621	0.758392	0.0226055
22	26.4	1	0.0682847	0.10144	-0.0131037	0.113015	0.0705372	0.0013111	0.0421856	0.026409	-0.0116255	0.0363558	0.0266223	-0.00475483	0.15594	0.0559465	-0.0256312	0.0849509	0.175783	-0.030218	0.329968	0.527149	0.0113778
23	27.6	1	0.130709	0.0700963	0.00157931	0.0665011	0.049051	-0.01615	0.00809325	0.0211822	-0.00159688	0.0302251	0.00593884	-0.0108324	0.0166235	-0.00765824	-0.00939364	0.0406084	0.134225	-0.0342884	0.169906	0.285003	0.00868791
24	28.8	1	0.133287	0.0336916	-0.0264338	0.0502858	0.0291955	-0.0129987	-0.0110612	0.040908	-0.0147094	0.0207077	-0.00681392	-0.00187468	-0.0656926	0.0111072	0.0902696	0.0413615	0.105875	-0.0299186	0.0822231	0.144309	0.00141598
25	30	1	0.133535	0.0208907	-0.0103169	0.0204956	0.0143638	-0.0104265	-0.0229329	0.0375727	-0.00733143	0.0134632	0.00465705	-0.0114647	-0.029466	0.0137214	0.00455032	0.0208768	0.0709491	-0.0184793	0.07758	0.164561	0.00394479
26	31.2	0	0.0811974	0.0288498	-0.0157318	0.015702	0.0116057	-0.00218397	-0.0252096	0.0245915	-0.0091036	0.0233538	0.00301575	-0.0042096	-0.0531573	0.0149496	-0.0408707	0.0110767	0.052023	0.000222992	0.0360511	0.063251	-0.00231256
27	32.4	0	0.0374834	0.0238065	-0.00284145	0.0154423	0.0128445	-0.00551596	-0.00902432	0.00593616	-0.0082465	0.00966526	-0.00267368	-0.00493016	-0.141795	0.0158225	-0.0446823	0.00686943	0.0366897	-0.0132948	0.023532	0.0408054	0.00301169
28	33.6	0	0.0164201	-0.000831206	-0.00744514	0.0100573	0.00289071	-0.0180393	-0.0128948	0.0170375	-0.00572765	-0.0177871	-0.00652132	-0.00711826	-0.173636	0.0147798	0.0121481	0.0178013	0.00755684	-0.0180179	-0.00944717	0.00539363	0.0142301
29	34.8	0	0.00522987	0.00393427	-0.00557583	-0.00523086	-0.0108081	-0.0114988	-0.0234996	0.0165859	-0.0117548	-0.0186339	-0.00247134	-0.0161744	-0.189811	0.0091525	0.0337621	0.020006	0.00306731	-0.00939834	-0.0186317	0.0529201	0.0118914
30	36	0	-0.00557761	-0.00551698	-0.00625658	-0.0264133	-0.0152829	0.0100218	-0.0082207	0.0195575	-0.0157852	-0.0117121	0.00351944	-0.00673732	-0.14519	0.00535701	0.024178	0.0122893	-0.0183743	0.00269965	-0.000930277	0.0119231	0.00461335
31	37.2	0	-0.00719873	-0.0214152	-0.00794899	-0.0235116	-0.0100817	0.00337895	-0.00430368	0.0129256	-0.0107497	-0.0127682	-0.00524916	-0.0142755	-0.0973046	0.00808753	0.0698039	0.00652245	0.00137354	-0.00739085	-0.0183633	-0.00278624	-0.00320621
32	38.4	0	0.00688476	-0.0183854	-0.0369119	-0.0326303	-0.0224342	0.013041	0.000795264	0.0225744	-0.00761984	-0.00999571	-0.0141973	-0.00515308	-0.149786	0.00426132	-0.0396142	0.00499397	-0.00129623	-0.0331535	-0.0241815	-0.0160859	-0.00315209
33	39.6	0	-0.000444057	-0.0140196	-0.00934223	-0.00649997	-0.0146668	-0.0189251	-0.0275067	0.00882759	-0.00130262	-0.0168957	-0.00695723	0.000854238	-0.176755	0.00854653	-0.0189319	-0.00728089	-0.0095003	-0.031853	-0.00942177	-0.0118784	-0.00166026
34	40.8	0	-0.012276	-0.0128739	-0.0208657	-0.0110176	-0.0316906	-0.00446445	-0.0172429	0.00598367	-0.000377002	-0.0202762	-0.00318379	-0.00687728	-0.191434	0.0253422	-0.0130882	-0.00900901	-0.0148027	-0.0293288	-0.0498647	-0.00220028	-0.0292593
35	42	0	-0.0221378	-0.0299886	-0.0103019	-0.0211145	-0.0200881	-0.0224461	-0.0173256	0.0159863	-0.0135031	-0.0158925	0.00198478	-0.00506485	-0.162605	0.0351125	0.019704	0.00799765	-0.0126571	-0.0446257	-0.0263249	-0.00523576	-0.0290436
36	43.2	0	0.00595036	-0.0162966	-0.0225117	-0.00477097	-0.0165329	-0.0259165	-0.0254983	0.0223131	-0.0105573	-0.0200217	-0.00947919	-0.00693165	-0.202026	0.00804596	0.0545224	0.00377248	-0.0192048	-0.0257946	-0.0623441	-0.0142677	-0.0178638
37	44.4	0	0.00574772	-0.019137	-0.0225489	-0.0348198	-0.000838524	-0.0132697	-0.0401391	0.0277389	-0.0276085	-0.0240966	-0.00616373	-0.00674107	-0.212823	-0.00576682	-0.0422668	0.0101091	-0.0239271	-0.0277089	-0.0506921	-0.0291167	-0.0414177
38	45.6	0	-0.0210233	-0.0103168	-0.0147577	-0.0426542	0.00259377	-0.0191261	-0.026993	0.0240742	-0.0106981	-0.0233474	-0.00977734	-0.0100507	-0.188161	0.00913744	-0.0106053	0.0189796	-0.0109775	-0.0320335	-0.051962	-0.023309	-0.0457159
39	46.8	0	-0.0321797	-0.0138856	-0.027388	-0.0477028	-0.0229464	-0.0227039	-0.0186255	0.00812256	-0.0172261	-0.0328485	-0.00677979	-0.00870839	-0.240678	0.0134696	-0.121196	-0.00642541	-0.0231221	-0.0381535	-0.0343308	-0.0262008	-0.0467061
40	48	0	-0.0205392	-0.0127067	-0.0177288	-0.0473402	-0.0186861	-0.0254653	-0.0236366	0.0178798	-0.0199785	-0.0388082	-0.00621932	-0.0115458	-0.219726	0.0122746	-0.167819	0.00651859	-0.0158823	-0.0566343	-0.0325152	-0.0151165	-0.0233049
41	49.2	0	-0.00793048	-0.00836409	-0.020755	-0.0418597	-0.0268876	-0.00893235	-0.0167039	0.0152816	-0.00955119	-0.0364852	-0.00855303	-0.0159491	-0.174249	0.00810078	-0.0900028	-0.00309027	-0.0271594	-0.0325853	-0.042048	-0.0268696	-0.0437705
42	50.4	0	-0.00921387	0.00535782	-0.0237624	-0.0405061	-0.0129118	0.00618571	-0.0264251	0.0168226	-0.00771328	-0.037168	-0.00973374	-0.0105704	-0.203092	0.00600275	-0.142103	-0.00611804	-0.0214467	-0.0399809	-0.0335321	-0.0317464	-0.0252152
43	51.6	0	-0.00932645	-0.0115842	-0.0138901	-0.0339346	-0.0219803	0.000588875	-0.030194	0.0220183	-0.0157951	-0.043545	-0.0134173	-0.0115024	-0.237279	0.016217	-0.131646	0.00155917	-0.0249266	-0.0330699	-0.0454923	-0.0385378	-0.0294339
44	52.8	0	0.00417163	-0.00452071	-0.0329248	-0.0120451	0.00110662	-0.0216002	-0.0308447	0.0261384	-0.0078516	-0.0445215	-0.00288215	-0.0113311	-0.190986	0.0106512	-0.0624759	-0.00259373	-0.0174546	-0.0542428	-0.041861	-0.0367299	-0.0185554
45	54	0	-0.0100469	-0.00347242	-0.0109531	-0.0240227	0.0059544	-0.0203374	-0.0327158	0.0280775	-0.0144644	-0.0465056	0.00342479	-0.0144463	-0.194192	0.0179735	-0.109011	0.0144381	-0.0226081	-0.0389897	-0.0455469	-0.0013618	-0.0192034
46	55.2	0	-0.0148878	0.00464162	-0.0270446	-0.0323864	0.000917057	-0.0265935	-0.0300327	0.0300452	-0.0206012	-0.0452316	-0.0105311	-0.0062343	-0.195487	0.015243	-0.0898936	0.0147595	-0.0309556	-0.0611263	-0.0484477	-0.026499	-0.0324212
47	56.4	0	0.00213398	-0.000251158	-0.0325371	-0.0408816	-0.0168446	-0.0327044	-0.0341614	0.0311891	-0.0311996	-0.0469123	-0.0120785	-0.00533497	-0.269626	0.00607503	-0.0778832	0.0195958	-0.0335989	-0.0424655	-0.0489846	-0.0214473	-0.0208802
48	57.6	0	-0.0225093	0.00738246	-0.0387168	-0.0575556	-0.0296664	-0.0292772	-0.0342366	0.0394604	-0.0270963	-0.0375432	-0.0108941	-0.0100481	-0.24304	0.00577505	-0.0497134	0.0244134	-0.00993949	-0.0463334	-0.0588771	0.0091223	-0.0260314
49	58.8	0	-0.0172744	-0.00324328	-0.0320864	-0.0485701	-0.00429225	-0.0280923	-0.0315037	0.0628044	-0.0199868	-0.0478805	-0.0115519	-0.0101767	-0.215838	0.023511	-0.0764316	0.0268862	-0.0188253	-0.0437088	-0.0570311	-0.0186861	-0.0291999
50	60	0	0.00305711	0.00462833	-0.0410023	-0.044483	-0.00248483	-0.0257823	-0.0341323	0.0598741	-0.00602821	-0.0456178	-0.00290957	-0.014236	-0.291205	0.0240574	-0.0835562	0.0329293	-0.0183648	-0.0302145	-0.0540244	-0.0251477	-0.0164655
51	61.2	0	0.00183001	-0.0104529	-0.0488508	-0.051281	-0.00549075	-0.00686371	-0.0460198	0.0409216	-0.017065	-0.0507222	-0.00351241	-0.0166782	-0.30885	0.0151135	0.0124847	0.0473595	-0.0218769	-0.00343477	-0.0761365	-0.00592001	-0.0293756
52	62.4	0	-0.00881985	0.00030011	-0.0238392	-0.0474169	-0.0198361	-0.00898377	-0.0446429	0.0352497	-0.0220763	-0.0524726	-0.00956763	-0.00857639	-0.226186	0.0153683	-0.086243	0.0311486	-0.0145246	-0.00373736	-0.0579896	-0.0179796	-0.0344473
53	63.6	0	-0.000128839	0.00421654	-0.0359306	-0.0376776	-0.0276194	-0.0159989	-0.0509599	0.0357761	-0.0246067	-0.0581449	-0.00776313	-0.0100492	-0.224434	0.0251464	-0.0314105	0.0289275	-0.0101534	-0.012088	-0.0675052	-0.0176845	-0.0227825
54	64.8	0	-0.0247158	-0.0128606	-0.0292952	-0.0417157	-0.0232312	-0.0332871	-0.0505788	0.0348565	-0.014487	-0.0502411	-0.0107622	-0.0130323	-0.216336	0.0150605	-0.112722	0.0191646	0.0222563	-0.0155271	-0.0642549	-0.0143759	-0.04438

## Sheet: 20210809_SS47082_G2N-1
Taste responses of G2N-1 (SS47082) in pseudodessicated animals
Frame	Time (seconds)	Taste stimulus	20210809_Fly1_water	20210809_Fly1_sugar	20210809_Fly1_bitter	20210809_Fly2_water	20210809_Fly2_sugar	20210809_Fly2_bitter	20210809_Fly3_water	20210809_Fly3_sugar	20210809_Fly3_bitter	20210809_Fly4_water	20210809_Fly4_sugar	20210809_Fly4_bitter	20210809_Fly5_water	20210809_Fly5_sugar	20210809_Fly5_bitter
0	0	0	0.134953	0.0941696	0.125405	0.0661048	0.022553	0.0289245	0.0887043	0.0520876	0.00226945	0.0502437	0.0210085	0.0255651	0.0216388	0.0257536	0.0224525
1	1.2	0	0.0572604	0.0289623	0.0361297	0.021276	0.00427313	0.00661976	0.0663135	-0.00961015	-0.00469664	0.0224352	0.00732892	0.0185932	0.0394975	0.00523269	0.0189832
2	2.4	0	0.0394011	0.0176186	0.0337332	0.0205631	-0.000278905	-0.00730101	0.0887647	0.00932003	0.00100055	0.0300532	0.0137911	0.0104583	0.0237112	0.00876793	-0.00564401
3	3.6	0	0.0258772	0.0163101	0.0371721	0.021293	-0.00379999	-0.00299756	0.103476	-0.0106725	0.011608	0.0247264	0.0111151	0.0183438	0.0177664	0.0188282	-0.0214373
4	4.8	0	0.0186024	0.0116374	0.0350525	0.010406	-0.00295555	-0.00360369	0.100249	-0.0142769	-0.00663905	0.0347433	0.00831244	0.0149692	0.00165475	0.00797728	-0.0255622
5	6	0	0.025094	0.0142253	0.0233805	0.00836705	-0.0118817	0.00218859	0.103238	-0.00467112	-0.00420175	0.0293353	-0.0017968	0.0165573	-0.0203497	0.00948577	-0.0172994
6	7.2	0	0.0264867	0.0117007	0.0168528	0.0218397	-0.00764902	-0.00294978	0.140665	-0.00226057	-0.00193273	0.0126041	0.00416909	0.0132313	0.0261155	0.0334421	-0.00232123
7	8.4	0	0.0111671	0.0155031	0.0202615	0.00664131	-0.00381463	0.00297435	0.123949	0.00438826	-0.00150447	0.0146084	0.0153897	0.020352	0.00156998	0.0373228	0.0106712
8	9.6	0	0.0167411	0.0121533	0.0202118	0.00645831	-0.0186865	0.00275844	0.1122	0.00406835	-0.010087	0.0212384	0.0412569	0.0197768	-2.40043e-05	0.0415027	0.00413048
9	10.8	0	0.00484258	0.000213488	0.00603447	0.0129015	0.00280453	-0.00995566	0.0783523	-0.00679175	-0.00437859	0.0196505	0.02663	0.00981548	-0.00449996	0.0338749	-0.00404933
10	12	0	-0.00298602	0.0078967	-0.00158887	0.0169647	-0.00216342	0.00206145	0.0309825	0.00196214	-0.00514906	0.00679207	0.0144405	0.0059859	0.006442	0.0538623	0.000533912
11	13.2	0	-0.00214712	0.0126314	-0.000407636	0.0178746	0.00118434	0.00512866	0.0261027	0.000577313	-0.00297777	0.00405975	0.00836228	-0.00684698	-0.00922462	0.0135272	0.0122455
12	14.4	0	-0.00339236	-0.00297693	0.00181171	-0.002231	0.0132359	-0.00545866	-0.00462306	0.0010324	0.000412182	0.00138965	0.0093202	-0.00240869	-0.0143891	0.00426531	0.0146069
13	15.6	0	-0.00333665	0.00424194	0.0135854	-0.00642978	0.00492387	0.00173937	-0.0109476	0.0107875	-0.00598757	-0.00398398	-0.00639442	-0.00246545	-0.0182688	-0.0295682	-0.00738009
14	16.8	0	0.00368582	0.00576201	0.000486993	-0.0156179	-0.000971981	0.0127205	-0.00531038	0.00954253	0.00148651	-0.00343484	-0.010593	-0.00109708	0.00791491	-0.0223857	-0.0076096
15	18	0	-0.00475556	-0.00389011	-0.00171353	-0.0128691	-0.00770658	-0.00249292	-0.0349938	0.00948853	0.00347189	-0.00349864	-0.015177	-0.000555632	-0.0117134	-0.0190672	-0.00871209
16	19.2	0	0.000480981	-0.0122243	-0.00488291	-0.00559058	-0.00811278	-8.42572e-05	-0.0366256	-0.0226705	0.00359982	-0.0114924	-0.00679189	0.00363623	0.021447	-0.0142109	0.00746406
17	20.4	0	0.00760831	-0.0116542	-0.0133256	-0.00500242	-0.00319389	-0.00365847	-0.0429372	-0.00392816	0.00952259	-0.00948206	-0.0197966	-0.00606377	0.0222919	-0.0202978	-0.00709923
18	21.6	0	0.0114522	-0.0133431	-0.0149344	-0.000823549	-0.00582397	-0.007436	-0.0303033	0.0149189	0.0099197	-0.0158967	-0.0135414	0.00111067	0.0258562	-0.014217	-0.00460111
19	22.8	0	0.00101512	0.30877	-0.0104893	-0.00639263	0.00407274	0.00488864	-0.0351419	0.0658387	0.00476359	-0.0159407	-0.00405403	-0.00206456	0.000912066	0.0526781	-0.0141158
20	24	1	0.0958988	0.459163	-0.00912769	-0.00532136	0.0933264	0.00650366	0.0238921	0.071134	-0.0134611	-0.00315827	0.167664	0.0035046	0.0168523	0.275605	0.00693841
21	25.2	1	0.0883585	0.44452	-0.0150406	-0.013649	0.160634	-0.00852607	0.0755877	0.0602821	-0.00626718	-0.00999396	0.249331	-0.0110369	0.013766	0.262313	-0.00403843
22	26.4	1	0.0440216	0.404052	-0.0170405	-0.00726858	0.132714	-0.00910136	0.0700858	0.0401421	-0.0224913	-0.0108107	0.180425	-0.0215857	-0.0123035	0.228414	-0.00986101
23	27.6	1	0.036642	0.316535	-0.0148886	-0.0255794	0.10914	-0.0209496	0.0417462	0.0338722	-0.0171321	-0.00706196	0.0811305	-0.0111848	-0.0109938	0.212843	-0.00705337
24	28.8	1	0.0893154	0.321923	-0.0191593	-0.00417737	0.0485426	-0.0253625	0.0196259	0.0218694	-0.0147352	-0.0179431	0.153675	-0.0134324	0.00171856	0.223791	-0.0160355
25	30	1	0.0661311	0.212327	-0.0142057	-0.014305	0.00790721	-0.03209	-0.0294866	0.0287076	0.000824299	-0.0135906	0.351694	-0.0021162	0.00325113	0.206656	-0.00572578
26	31.2	0	0.123546	0.11285	-0.00656988	-0.0157237	-0.011198	-0.0285516	-0.0284231	0.0168405	-0.000948016	-0.0230656	0.411697	-0.00930363	-0.000445785	0.162869	-0.00991989
27	32.4	0	0.0920385	0.0615275	-0.0117239	-0.0281412	-0.000226871	-0.0387609	-0.0323146	0.0132473	0.00276915	-0.0170007	0.205358	-0.00955531	0.0123548	0.154358	-0.0175345
28	33.6	0	0.0556613	0.0360733	-0.0155552	-0.0234055	-0.00655463	-0.0263101	-0.0479825	0.0239539	0.000392372	-0.0258539	0.0789462	-0.017992	-0.0228999	0.131011	-0.0153571
29	34.8	0	0.0393258	0.0156719	-0.0155226	-0.0371505	-0.00622211	-0.0333682	-0.0585392	0.0219554	-0.00360345	-0.0354582	0.0404101	-0.016988	0.00684259	0.123977	-0.0321221
30	36	0	0.0233474	0.00849482	-0.014634	-0.0376217	-0.0143828	-0.0431348	-0.0617161	0.0227659	7.66319e-05	-0.0405876	0.0131856	-0.0228096	-0.00115714	0.138927	-0.0180586
31	37.2	0	0.0344464	0.00628565	-0.0138335	-0.0383078	-0.0121917	-0.0345735	-0.077473	0.0236487	-0.000193821	-0.0377488	-0.0120146	-0.0135107	-0.00698229	0.117945	-0.0223992
32	38.4	0	0.0152436	0.0040155	-0.0146212	-0.0353194	-0.00450602	-0.0366254	-0.0831745	0.0260122	-0.00562822	-0.0377301	-0.0242405	-0.0266641	-0.0102481	0.117994	-0.0211664
33	39.6	0	0.00374481	-0.00604738	-0.0166335	-0.0461417	0.00279805	-0.0402662	-0.0678805	0.0252259	-0.00511656	-0.0444157	-0.042592	-0.018917	0.000858793	0.0881656	-0.0151832
34	40.8	0	0.0122026	-0.0117752	-0.0174837	-0.068957	0.00886725	-0.0446392	-0.0536298	0.00841369	-0.0186567	-0.0389228	-0.0483276	-0.0244119	-7.5129e-05	0.0835451	-0.0151859
35	42	0	0.00964657	-0.0216163	-0.0243364	-0.0804364	0.00533386	-0.0403839	-0.061551	0.0338567	-0.0147116	-0.0418652	-0.0433996	-0.0260134	0.0172732	0.0725364	-0.0272307
36	43.2	0	0.0152763	-0.00877716	-0.0197105	-0.0932799	0.00844816	-0.0328213	-0.0288286	0.0370125	-0.0174878	-0.0518798	-0.0396045	-0.0225703	0.0130302	0.0754343	-0.0312643
37	44.4	0	0.00121174	-0.0171886	-0.028818	-0.0921541	0.00913445	-0.0268491	-0.0324358	0.0524544	-0.0215409	-0.0472181	-0.0371114	-0.0163038	0.0167099	0.0713019	-0.025357
38	45.6	0	-0.00645629	-0.0162734	-0.0294239	-0.0873518	0.0155488	-0.031379	-0.0461173	0.0380092	-0.0276377	-0.0578068	-0.0373043	-0.0126149	0.0327107	0.0727118	-0.017329
39	46.8	0	-0.0103722	-0.00686284	-0.0206218	-0.0865926	0.0188989	-0.03175	-0.06271	0.0389993	-0.0250387	-0.0466146	-0.0324804	-0.0278975	0.0118393	0.0605717	-0.0211102
40	48	0	0.00374481	-0.0165244	-0.0167976	-0.0990991	0.0168362	-0.0181843	-0.06357	0.0518349	-0.0179451	-0.0356929	-0.0242234	-0.0341684	0.00922728	0.0650104	-0.0192032
41	49.2	0	0.00284693	-0.0247997	-0.0256934	-0.0952281	0.0197958	-0.0271826	-0.0387374	0.0428587	-0.0152748	-0.0337083	-0.0165956	-0.0234885	-0.00271193	0.0541631	-0.0208215
42	50.4	0	0.00148372	-0.0330149	-0.0304727	-0.105284	0.0239823	-0.026752	-0.0422726	0.0498163	-0.0169304	-0.0431701	0.0103205	-0.0269375	0.0189188	0.0467718	-0.0167452
43	51.6	0	-0.0116142	-0.0214192	-0.0271478	-0.102897	0.0157319	-0.0264237	0.00848721	0.0504502	-0.0117644	-0.0536188	-0.00836264	-0.0374989	-0.00924145	0.031739	-0.0285412
44	52.8	0	0.00325655	-0.0236786	-0.0260638	-0.0915418	0.027399	-0.0213952	0.0466556	0.0514178	-0.0179421	-0.0623021	-0.0117642	-0.037133	0.00149829	0.0377978	-0.0223183
45	54	0	0.000890598	-0.0200262	-0.0225794	-0.0982653	0.0172057	-0.0223715	0.0555508	0.0392243	-0.0110677	-0.0524925	-0.0163914	-0.0404925	0.00671833	0.0569953	-0.00891665
46	55.2	0	0.00193266	-0.0266914	-0.0280747	-0.0954084	0.0194074	-0.0201975	0.0179498	0.0468218	-0.0133673	-0.0582654	-0.028242	-0.0575134	0.0129934	0.0366283	-0.00507068
47	56.4	0	-0.00638092	-0.0226697	-0.0118347	-0.0945338	0.0158865	-0.0162155	-0.00370272	0.0296948	-0.00942291	-0.0526608	-0.0284154	-0.0530633	0.0148718	0.0374937	-0.00820053
48	57.6	0	0.0052096	-0.0120057	-0.01553	-0.091894	0.0270846	-0.017218		0.0368193	-0.013741	-0.060385	-0.0403111	-0.0589882	0.0218473	0.0405725	-0.0105619
49	58.8	0	-0.000770808	-0.0204622	-0.0165518	-0.0848942	0.0383179	-0.0192976		0.0539067	-0.0172598	-0.0632084	-0.0441212	-0.0356131	0.0286304	0.0275682	-0.0293178
50	60	0	-0.0100609	-0.0248728	-0.0234297	-0.0860519	0.0152052	-0.00275538		0.0475708	-0.0116653	-0.0583022	-0.0500313	-0.0330057	0.0314513	0.0266843	-0.0213471
51	61.2	0	0.00271585	-0.0313139	-0.027722	-0.0936787	0.0216972	-0.00421779		0.0591675	-0.0170422	-0.0675309	-0.0489536	-0.0321468	0.0333182	0.026712	-0.0128552
52	62.4	0	0.0089453	-0.0282536	-0.0271119	-0.0929772	0.028977	0.00415233		0.0506556	-0.0211849	-0.0672035	-0.0473657	-0.0282409	0.0368299	0.036087	-0.0158137
53	63.6	0	-0.00461793	-0.0322207	-0.0343716	-0.0979633	0.0207386	-0.00989136		0.0478952	-0.0404669	-0.0653636	-0.0505308	-0.0326131	0.0392057	0.0285016	-0.007587
54	64.8	0	-0.00621052	-0.0252488	-0.0249529	-0.0937193	0.022723	-0.00467621		0.0548861	-0.0318697	-0.0741547	-0.0381176	-0.0335983	0.0233429	0.0209704	-0.0184189

## Sheet: 20211105_SS50091_Rattle
Taste responses of Rattle (SS50091) in pseudodessicated animals
Frame	Time (seconds)	Taste stimulus	20211105_Fly1_water	20211105_Fly1_sugar	20211105_Fly1_bitter	20211105_Fly2_water	20211105_Fly2_sugar	20211105_Fly2_bitter	20211105_Fly3_water	20211105_Fly3_sugar	20211105_Fly3_bitter	20211105_Fly4_water	20211105_Fly4_sugar	20211105_Fly4_bitter	20211105_Fly5_water	20211105_Fly5_sugar	20211105_Fly5_bitter	20211105_Fly6_water	20211105_Fly6_sugar	20211105_Fly6_bitter	20211105_Fly7_water	20211105_Fly7_sugar	20211105_Fly7_bitter	20211105_Fly8_water	20211105_Fly8_sugar	20211105_Fly8_bitter
0	0	0	-0.0381842	0.0792504	0.00738513	0.00472901	-0.00515545	-0.00871907	0.0774695	-0.0296136	-0.0427724	0.0220598	-0.0313537	0.0612801	-0.00320305	0.0324767	-0.075643	0.00813517	0.0333369	0.0441584	-0.10467	0.118718	0.037066	0.0592057	-0.00943917	0.0138537
1	0.67	0	0.00841507	0.0468639	0.0223337	0.00590001	-0.00183213	-0.0551027	-0.00669372	-0.0150229	-0.0284263	-0.0285713	-0.0423004	0.00671918	0.0132381	-0.0437421	-0.120311	-0.00265905	0.0245	0.025264	-0.0630613	0.125151	-0.00564517	0.045318	0.00250824	0.00546367
2	1.34	0	-0.0299319	0.0595804	0.0345011	-0.0372504	-0.0169372	0.00016413	-0.0158412	-0.0415553	0.0144971	0.00561636	-0.076767	-0.000516115	0.0313623	-0.024516	-0.00814172	-0.00270564	0.0261458	0.0143842	-0.0336474	0.0510668	0.00889331	0.0446874	0.051083	-0.0255775
3	2.01	0	-0.0164077	0.0666236	0.0369392	0.024451	0.0134325	0.0841963	0.105065	-0.00963129	-0.0301142	0.0290522	0.00886922	0.00548267	0.00175535	0.0453207	-0.145006	-0.00340685	0.000890806	-0.000480672	-0.0582553	0.0943654	0.0352357	-0.0425212	0.0221041	0.0370936
4	2.68	0	0.0272251	0.0370146	0.00825851	-0.0336396	-0.0145384	0.00697273	0.0504183	0.00586067	0.00770836	-0.00544536	-0.00331273	0.010365	-0.0202199	-0.0275523	-0.0495446	-0.00283322	0.00515278	-0.0142932	-0.0153711	-0.00271299	-0.0137082	-0.0102509	0.060982	0.0139983
5	3.35	0	0.018439	0.0350774	0.0113755	0.0168529	0.0623884	0.00656183	-0.110037	0.0384038	0.0318539	0.0149639	0.00273016	0.0162915	0.0076318	-0.0144841	0.0338609	0.0167704	0.000276013	-0.00985327	-0.0047938	0.0127832	-0.023526	0.000661015	0.00544572	0.0473463
6	4.02	0	-0.0119911	0.00683996	-0.0110671	0.0162689	0.0219566	-0.0193427	-0.0352335	-0.0244397	-0.00686082	-0.0134704	0.015954	0.0234521	-0.0205705	-0.0249369	0.0474595	0.00558938	-0.0147074	0.000264322	-0.0619357	-0.0419257	-0.0130519	-0.0605431	-0.0113097	-0.0445913
7	4.69	0	0.0070956	-0.0114079	-0.0295793	0.00461162	0.00490895	0.0295867	0.0476458	0.0026606	-0.0331797	-0.00949765	0.00498893	-0.013545	-0.0142151	-0.0225028	0.00508582	0.011912	-0.0102047	0.0132759	0.0257172	-0.0151486	-0.0195567	-0.0832823	-0.0463996	-0.0288501
8	5.36	0	0.00756869	-0.0575582	-0.00494873	-0.0274716	0.00708396	0.0489946	0.0694347	0.0323126	-0.0203719	0.0040474	0.00462258	-0.00107104	-0.0169128	0.0404745	0.0796195	0.0156047	-0.0160378	0.00739851	0.0163227	-0.043934	-0.000358946	-0.0286243	-0.0206885	-0.00940866
9	6.03	0	0.0034621	-0.0263753	-0.0264674	-0.0283209	0.0182031	-0.00435957	-0.0741672	0.0121319	-0.016088	-0.00595231	0.0151478	0.030973	-0.00256728	-0.0233402	0.0408935	0.0047395	-0.0167077	0.00616269	0.0450254	-0.00822169	0.00533258	-0.0699008	0.00558064	-0.0408348
10	6.7	0	0.00476763	-0.0328894	-0.032738	0.0114155	-0.047721	0.00874227	0.0378387	0.0512199	0.0512075	-0.00515929	0.00275142	-0.00712844	0.0172871	-0.0410104	0.0158481	-0.00850713	-0.0134386	0.011221	0.0309882	-0.0535152	-0.0233415	-0.0137389	0.0346373	-0.0141676
11	7.37	0	0.00278474	-0.0317521	-0.0297435	0.0321441	-0.0312913	-0.00814261	-0.0408039	-0.0204086	-0.0301379	-0.00696157	0.0424879	-0.00751592	-0.0314745	-0.00191124	0.0414276	-0.0142153	-0.0233926	-0.00392603	0.089292	-0.00511061	0.0566191	-0.0207695	-0.0349623	-0.0249673
12	8.04	0	0.0313177	-0.0334264	-0.00424227	-0.0266693	0.0232267	-0.00978392	-0.116663	-0.00766548	0.0459295	0.0212872	-0.0124581	-0.0289629	-0.0352723	-0.0155266	0.00750669	0.01232	-0.0375978	-0.000343416	0.0243996	-0.038591	0.0273021	0.029128	-0.0698667	0.000271731
13	8.71	0	-0.00350318	-0.037151	-0.00198654	0.0151569	-0.026425	0.00945107	0.00739479	0.0196358	-0.0359986	0.0247097	-0.00593389	-0.0116368	0.00815466	0.0177887	0.0815847	-0.00847851	0.014551	-0.0121101	0.051106	-0.00914528	-0.0576613	0.031682	-0.00934844	0.0243418
14	9.38	0	0.0163523	-0.029372	0.00373328	-0.0120946	0.0379481	0.0234628	0.0250908	0.0134103	-0.0395215	0.00103971	0.00607356	-0.0397808	0.0258003	-0.00408943	-0.0212572	-0.00275947	0.0202656	-0.0155382	-0.0458888	-0.036228	0.0130782	0.00621881	0.00526889	0.00119133
15	10.05	0	0.0139739	-0.0263243	0.0121843	0.0114622	0.00924183	-0.0364197	-0.0119023	0.010094	0.0223831	-0.00312049	-0.0266019	-0.0060431	-0.0230134	0.0389787	0.0649422	-0.00822436	0.000520137	-0.00860718	-0.00881317	-0.0373058	-0.0225138	0.0385126	-0.0249324	0.0486396
16	10.72	0	0.00504715	0.000988588	0.0157024	0.00800967	-0.0261997	-0.0343096	-0.082663	-0.0275483	0.0579898	0.00854004	0.0310585	0.0349302	0.0279181	0.0486237	0.02656	-0.00956184	0.010533	-0.0510012	0.0277469	-0.0404736	0.00143114	0.0271455	-0.00567298	0.019167
17	11.39	0	-0.00815624	-0.0226193	-0.0120369	0.00918054	-0.0450583	-0.00852814	0.00629835	-0.0127253	0.0440358	-0.00132635	0.0497457	-0.0389059	0.0230971	0.0435446	0.0254453	0.00127575	0.00943737	-0.00384879	0.0463047	-0.0160825	0.0188116	0.00080552	0.00625845	-0.0155424
18	12.06	0	-0.0382747	-0.0233628	0.000396743	0.00526414	0.0167683	-0.0334244	0.0673492	0.00288086	0.00786604	-0.0518116	0.0142979	-0.0343878	0.0112039	-0.0235954	-0.0503308	-0.0129955	-0.0135228	-0.002127	0.0395339	-0.0536896	-0.0244061	0.0462664	0.0387513	-0.00742717
19	12.73	0	-0.0529829	-0.0074321	-0.00883178	0.0371493	-0.000788819	-0.0158032	0.00476618	-0.0319309	-0.0130171	0.0714186	0.0137507	-0.00718073	-0.022461	0.0382015	-0.0027278	-0.0145267	-0.00350069	-0.0171318	0.0298196	-0.0128523	-0.00343124	-0.0703019	-0.0230349	0.0409842
20	13.4	0	-0.0527104	0.00134754	0.0575042	0.0398683	0.0273795	-0.0833707	-0.0696669	0.00151571	0.0200155	0.0418456	-0.0176044	-0.0264877	0.00117051	0.0701673	0.173203	-0.01031	-4.03785e-06	-0.0244862	0.117428	-0.0895031	0.0206228	-0.0252542	-0.0120946	-0.00517024
21	14.07	0	-0.0658986	-0.00190601	0.0436625	0.0560125	0.0162773	-0.0510471	-0.0756801	-0.0347467	-0.0449964	0.0613523	-0.00488492	-0.0292816	0.0360086	0.0272409	-0.096678	-0.00707192	0.0121725	-0.00620607	-0.00600439	-0.0493362	-0.00186059	0.0202631	-0.0706266	0.021836
22	14.74	0	-0.0372198	-0.0139768	0.00234919	0.0463634	0.0452027	-0.0511295	0.00956031	0.000882303	0.00162942	0.0458695	0.0213362	0.00199485	-0.00388374	0.00201977	0.00576773	-0.0104792	-0.0101022	-0.0381724	0.089101	-0.0450603	0.0571801	-0.0378988	0.0412794	-0.0279058
23	15.41	0	-0.0487703	-0.0409813	0.0415096	-0.00910942	0.023788	-0.0420239	-0.0315824	-0.032912	0.0503733	-0.0210554	-0.0133097	-0.011574	-0.0151808	0.0386602	-0.0106747	-0.021011	0.000965047	-0.031247	0.0468203	-0.0708216	0.00935722	-0.0170524	-0.0128023	-0.0296098
24	16.08	0	-0.0487439	0.0131891	0.0248922	0.00986179	0.0202185	0.0232067	-0.00686801	-0.000768011	-0.0622805	-0.0216463	0.00202282	0.00567976	0.0215151	-0.0119097	0.150824	-0.0132076	-0.0186284	-0.0186528	0.0344777	-0.0621554	0.0215717	-0.0950838	0.0210143	-0.0226711
25	16.75	0	-0.00980737	-0.0104216	0.00353037	0.0299938	-0.0322124	0.0620315	-0.123527	0.00333887	0.0119796	0.0453703	-0.0156525	-0.035788	0.041346	0.00468338	-0.0348616	0.0181922	0.0210921	-0.00383388	0.00587615	-0.0762725	0.0459881	-0.0943928	-0.0333869	-0.0309862
26	17.42	0	-0.0164983	-0.00262488	1.63387e-05	0.0663524	0.0170923	-0.0183263	0.0750537	-0.0418775	0.00236367	0.0403131	0.0405144	-0.00132179	0.0123286	0.0345393	0.0259812	-0.0030059	0.000499729	-0.000592848	0.0808857	-0.0764303	0.0523939	0.039945	-0.00744296	-0.0274391
27	18.09	0	-0.0140816	0.0239133	-0.0205533	0.0460251	0.00733863	0.03872	0.0867	-0.030281	0.0327968	0.0486783	-0.0250897	0.0347889	0.0447048	0.0725312	0.0136444	0.0142168	-0.0118937	-0.0165382	0.0427389	-0.0663074	-0.00119992	0.00190408	0.017823	0.00394733
28	18.76	0	-0.0312194	0.0263877	-0.0273699	0.0254879	0.00993627	0.00537057	-0.0595051	-0.0340333	-0.00257534	0.00595011	-0.0441084	0.049707	0.02985	0.0222567	0.0508476	-0.00621879	0.00825996	-0.0119562	0.0725777	-0.084838	-0.000338594	-0.0133407	-0.045022	0.0731909
29	19.43	0	-0.034653	0.0125735	-0.0180464	0.0360805	-0.0126924	-0.00876601	-0.049621	0.00396109	0.0404348	0.035666	0.0048826	0.0233652	0.00285836	0.0444303	0.0209953	0.00678009	-0.00913826	-0.0124924	-0.0251885	-0.0417218	0.00733127	0.00940657	-0.0356337	-0.024707
30	20.1	1	-0.0143695	0.0159408	0.00854727	0.0274408	0.0286961	0.00676037	-0.0438935	-0.0586787	0.0334552	0.0158332	-0.00454398	0.0410679	0.021345	-0.0118561	-3.19442e-05	0.0231328	-0.0261046	-0.00733207	0.0151312	0.165813	9.77153e-05	0.0721152	-0.0524263	-0.006332
31	20.77	1	-0.012581	0.207116	-0.0259404	0.0584444	0.0199749	-0.0394782	0.285746	0.255556	0.0133873	0.0450663	0.0327125	0.0438178	0.00674134	0.00416398	0.189365	0.120001	-0.0113643	0.00849804	0.0619927	0.250497	-0.0180718	0.0609809	-0.0397322	-0.0340016
32	21.44	1	0.0242221	0.920488	-0.0379471	0.153592	-0.0235334	-0.0228972	0.438448	0.699071	0.0732824	0.0289846	0.39668	0.0235208	0.0891583	0.0702409	0.283451	0.154309	0.0935488	-0.0190051	0.191678	0.348533	-0.0295371	0.056273	0.102092	-0.0393756
33	22.11	1	0.0770315	1.04883	0.014894	0.18087	-0.180256	-0.0454532	0.322207	0.821013	0.0494248	0.0635385	0.591345	0.0253925	0.0427813	0.109837	0.202867	0.1036	0.435688	0.0179996	0.121953	0.294721	-0.0537572	0.039858	0.0610081	0.0108792
34	22.78	1	0.0697686	1.1021	-0.0105671	0.126183	0.51647	0.000584902	0.310823	0.94452	0.0463923	0.0924884	0.744916	0.0113062	0.0211943	0.163912	0.197099	0.116977	0.630098	0.00504447	0.12209	0.381143	0.0076031	0.0353364	0.131052	-0.000359848
35	23.45	1	0.104895	1.07007	0.00921687	0.105529	0.979876	0.0347392	0.113342	1.05843	-0.0441892	0.0879515	0.860679	0.0373647	0.0363498	0.215144	-0.00369245	0.0914485	0.736771	0.0048394	0.0640368	0.445685	-0.0732626	-0.00736872	0.105248	0.0259026
36	24.12	1	0.0845823	0.995751	3.27738e-05	0.126204	1.33989	-0.0150239	-0.0773825	1.01127	0.045842	0.0684939	0.897996	0.0232802	0.0757266	0.18978	0.0826375	0.100954	0.717083	0.0188448	0.0234105	0.477443	-0.0877098	-0.00251028	0.109807	0.00500555
37	24.79	1	0.0774372	0.937903	0.00202087	0.113234	1.40809	-0.0801699	0.155875	0.94095	8.33989e-05	0.0665211	0.791509	0.0563407	0.0570208	0.13185	0.115466	0.0730345	0.67964	0.0134646	0.0606704	0.437994	-0.0587723	0.0368275	0.0898752	0.048379
38	25.46	1	0.047826	0.791016	-0.0204811	0.111692	1.37797	0.0562045	0.0179457	0.879642	-0.0364971	0.0254667	0.784831	0.0336139	0.0140634	0.166087	0.0711337	0.076332	0.629881	0.00873182	0.0353971	0.442889	-0.0754475	-0.0371766	0.115285	0.0666447
39	26.13	1	0.0698406	0.633915	0.0279988	0.0758193	1.25803	0.00893889	0.0642616	0.80219	0.0143653	0.0603503	0.75823	0.0154246	-0.0345246	0.196541	0.0423854	0.0409185	0.56569	0.0973833	-0.0331041	0.413395	-0.0510565	-0.0317887	0.100755	0.0846157
40	26.8	1	0.0835086	0.535227	-0.0202643	0.0876353	1.1876	0.016678	-0.0554467	0.779489	0.00604736	0.0356845	0.690825	-0.00629146	0.0462197	0.166604	0.0449018	0.00164386	0.4832	0.0897581	0.00248976	0.318653	-0.067633	-0.0493933	0.0695481	0.0690374
41	27.47	0	0.118867	0.482957	-0.0147551	0.119324	1.10042	0.0347945	-0.018789	0.761664	-0.046235	0.0186009	0.573126	0.00344541	-0.0691349	0.104835	0.0363346	0.0516001	0.445768	0.123324	0.0272819	0.251746	-0.0722177	-0.056418	-0.00661607	0.0583391
42	28.14	0	0.0715972	0.399997	-0.00960255	0.178375	0.900053	0.00987135	-0.0509738	0.726243	-0.0298796	0.0230992	0.455652	0.0403574	-0.0379823	0.187035	0.0699844	0.0291546	0.411892	0.106332	0.0766018	0.20028	-0.0246338	-0.00812221	0.0924665	0.123191
43	28.81	0	0.0943075	0.341947	-0.0375668	0.0842951	0.776581	0.0172987	-0.184594	0.82562	-0.0352479	0.0529148	0.330654	0.0112924	-0.0306183	0.176512	0.0713755	0.0363912	0.281665	0.113836	0.0315123	0.123585	-0.0103612	-0.0988789	0.0940797	0.0262114
44	29.48	0	0.0775536	0.322875	-0.0446054	0.124249	0.593934	-0.0238728	0.0537603	0.91358	-0.0221203	0.0361531	0.376938	-0.00469452	-0.0731436	0.160915	0.126405	0.0281819	0.239926	0.0768683	0.0622123	0.160316	-0.03742	0.0367493	0.0470119	0.0810946
45	30.15	0	0.0673559	0.245742	-0.028401	0.15517	0.525752	-0.0419946	0.119112	0.827127	0.00050059	0.092215	0.22689	-0.051568	-0.0670267	0.107673	0.0692255	0.0259263	0.209026	0.089014	0.0354076	0.125593	-0.0455804	0.0065824	-0.0405304	0.0836132
46	30.82	0	0.0699189	0.207144	0.0287994	0.0611801	0.378454	0.0858059	-0.0338949	0.801675	-0.0103173	0.0473908	0.238831	-0.00958444	-0.120962	0.101074	0.0366522	0.0175268	0.189455	0.109347	0.0334933	0.0584828	-0.0446129	0.063125	-0.0162828	-0.00216823
47	31.49	0	0.0358166	0.178393	0.100575	0.101943	0.469149	-0.071606	-0.132353	0.665433	-0.00172712	0.0275885	0.220711	-0.0328241	-0.0922542	0.0663272	0.0635859	0.026145	0.190025	0.0971927	0.0589997	0.0976559	0.000849637	0.0100769	-0.0197988	0.0518056
48	32.16	0	0.0258269	0.135238	0.084315	0.0716007	0.32906	-0.0458841	-0.0445867	0.490505	0.0299672	0.0293071	0.151213	0.00587274	-0.0550699	0.0741202	-0.0120526	0.0274188	0.158926	0.0872827	0.0160382	0.0984026	-0.00729809	0.0488228	-0.0350228	0.0523306
49	32.83	0	0.0306677	0.108725	0.0688196	0.0903384	0.365556	-0.056761	-0.150456	0.387417	-0.0464572	0.0382436	0.142887	-0.0138015	-0.0787587	0.0596014	0.100724	0.0050732	0.162514	0.0907915	0.0937438	0.153241	-0.0239774	0.0173626	-0.00776998	0.0715967
50	33.5	0	0.0300518	0.128887	0.0531969	0.139402	0.286273	-0.041779	-0.0162901	0.277561	0.0217471	0.0335638	0.132182	-0.0379742	-0.115264	0.0259154	-0.000218752	0.0166115	0.137601	0.0885808	0.0789953	0.0398682	-0.00910153	0.0141943	0.0046846	0.039063
51	34.17	0	0.0480596	0.0937244	0.0815552	0.11578	0.249009	-0.0557663	-0.0992353	0.245658	-0.0491969	0.00558404	0.200356	-0.0283291	-0.08192	0.0108965	0.0185401	0.0153439	0.118021	0.0907626	0.0337206	0.0511383	0.014636	0.0254154	-0.00787551	-0.0369064
52	34.84	0	-0.00537033	0.115907	0.0639936	0.104253	0.22135	-0.00660289	-0.0638625	0.169997	0.00487677	-0.0168319	0.181257	0.0286818	-0.0539874	-0.0258805	0.0989806	0.0269988	0.14499	0.0647774	0.023655	0.0540049	-0.0479822	0.0865677	0.0147675	0.0347003
53	35.51	0	0.036184	0.0670145	0.0570031	0.102013	0.217877	0.00304621	-0.07757	0.13773	-0.0425965	0.0341195	0.201676	-0.0310107	-0.0695299	-0.0010369	0.130071	0.00107209	0.09138	0.0856531	0.0875821	0.0589862	-0.0164117	0.0378634	-0.0176817	0.0619389
54	36.18	0	0.0217495	0.0861229	0.0513633	0.0917156	0.19297	-0.0295898	-0.0896328	0.179831	-0.0489904	0.0471976	0.218755	-0.0134157	-0.0910674	0.0101363	0.0454157	-0.0108988	0.0935569	0.0785235	0.0859304	0.0418138	-0.0488457	0.106205	0.0132299	0.0491311
55	36.85	0	0.0100589	0.0622177	0.061397	0.0931879	0.163201	-0.0227453	-0.0691998	0.163545	0.000420608	0.046531	0.212273	-0.0553416	-0.0470347	0.026771	0.191478	0.0402645	0.0555933	0.099308	0.103347	0.0174815	-0.00234195	0.0748614	-0.005079	0.0199076
56	37.52	0	-0.0186327	0.06943	0.0364237	0.0845905	0.176794	-0.0519836	0.00842536	0.105052	-0.0360058	0.0323283	0.155215	0.00093102	-0.0906737	0.0688081	0.0411128	0.00570143	0.0628741	0.0588564	0.024286	0.0477647	-0.00567065	0.0646717	0.0329401	0.0120489
57	38.19	0	0.0351416	0.0592914	0.00138032	0.0525062	0.150718	-0.00695037	-0.0240239	0.0970348	0.0077408	0.0759414	0.102912	-0.0147206	-0.0826367	0.0288901	0.0715006	0.00153326	0.059629	0.0874	0.0678108	0.0669492	-7.4756e-05	0.0592523	-0.0387486	0.072614
58	38.86	0	0.053727	0.0669604	0.0232923	0.0720539	0.136627	-0.0451916	0.0808085	0.0167936	0.0284223	0.0913031	0.118207	0.0300978	-0.074352	0.0391219	0.0936967	0.00786816	0.0482229	0.0911625	0.0165394	0.0491615	0.0340062	0.07526	0.0650018	0.0163955
59	39.53	0	0.083996	0.0671437	0.027821	0.0941497	0.161658	-0.0765577	-0.0343732	0.040372	0.0516662	0.0534731	0.056524	0.00407436	-0.0743864	0.0186543	0.00891785	0.0204587	0.0342139	0.0768763	0.0798727	0.0380347	-0.00384798	0.0372786	-0.041236	0.00534462
60	40.2	0	0.049441	0.0523524	0.0553267	0.103529	0.17439	-0.00915562	0.0538758	0.076779	-0.00970609	0.110837	0.0472817	-0.0258684	-0.0638933	0.0386466	0.161031	0.0075736	0.0402346	0.0720408	0.0786535	0.0331866	0.0946071	0.0907405	-0.00948711	-0.00140605
61	40.87	0	0.0384696	0.0590267	0.0131467	0.0686616	0.148348	0.0126121	0.108646	0.0314225	-0.0120122	0.0925192	0.0224639	0.0195808	-0.102016	0.0307555	0.0575584	0.00353182	0.0208614	0.0788861	0.0736508	-0.0152665	0.0502567	0.0476545	-0.0382643	0.01878
62	41.54	0	0.0392899	0.0405708	0.0305802	0.077439	0.144318	0.00571829	-0.00545845	0.00940705	0.0201124	0.0217747	0.0206239	0.00439207	-0.0476199	0.0632067	0.0253605	0.00451213	0.0282571	0.0590468	0.0308879	0.00620547	0.0385051	0.0459549	-0.0966784	-0.00291418
63	42.21	0	0.036825	0.0539312	-0.00756096	0.0656172	0.184503	0.0442029	0.075155	0.047209	0.0724503	0.035137	0.0342621	-0.00271379	-0.0867295	-0.0186336	0.0549	0.0167871	0.0245027	0.0767285	0.0197043	-0.0123742	0.0590303	0.0559644	-0.0323899	0.0099886
64	42.88	0	0.0379166	0.064504	-0.0276057	0.0169147	0.181405	0.0588993	-0.0520327	0.10736	0.0308611	0.0689843	0.0461779	-0.0263622	-0.0309086	0.0124252	0.0118859	0.0305487	0.0189413	0.0847281	-0.0446457	-0.029463	0.0562486	0.0203045	-0.0425224	-0.00427019
65	43.55	0	0.0498069	0.0735512	-0.00570202	0.0493115	0.226526	0.0633106	-0.0785853	0.0190553	0.0291524	0.010377	0.0221629	-0.00723966	-0.0375868	0.0720245	-0.0770255	-0.0111468	0.0272641	0.065214	-0.0290026	-0.019404	0.0279655	0.0385715	-0.0812507	0.0026785
66	44.22	0	0.0330187	0.0808497	-0.00181505	0.0339693	0.168334	0.00513889	-0.1611	0.00924931	-0.0841065	0.0371908	0.0281913	0.0655803	-0.0159814	0.0631061	0.0323983	0.0317125	0.00501128	0.0998796	-0.0646681	0.0270905	0.0332029	0.00507952	-0.00882169	0.00855339
67	44.89	0	0.0164301	0.046401	0.00886154	0.0417283	0.172127	0.0232581	0.0364534	0.0136982	-0.0409249	0.0313623	0.0298613	-0.0249003	-0.0601607	0.0192931	-0.0504474	0.00131683	0.043491	0.0767506	-0.0480894	0.0289024	0.022835	0.0350152	0.00679026	0.0576489
68	45.56	0	-0.0121165	0.0450859	-0.00215228	0.0830756	0.153751	0.0339566	0.0356843	-0.0159956	-0.00238369	0.0243985	0.0350648	0.0407123	-0.00805877	0.0414992	0.0414679	0.0137193	0.0351996	0.0670951	0.000717799	0.0103019	0.0208656	0.00382627	-0.0111043	-0.0288121
69	46.23	0	-0.0053347	0.0306666	0.0126279	0.0757138	0.158481	0.0513506	0.0560403	-0.0129238	-0.0268194	0.0034396	0.0282325	0.0165252	-0.0252786	0.0436023	-0.0268244	0.00701721	0.0428508	0.0862577	-0.0755749	0.00623668	0.00140313	0.0613006	-0.001957	0.0327542
70	46.9	0	-0.00122728	0.072301	0.0347631	0.11947	0.127	0.0275614	0.0124949	0.000549079	-0.0430673	-0.0442738	0.0262743	-0.0204958	-0.0430713	0.0451733	0.0129287	0.00769656	0.026049	0.074248	0.0225217	-0.0269486	-0.0274626	0.0548299	0.0496688	0.0488653
71	47.57	0	-0.0285668	0.0345732	0.0440687	0.0679929	0.10156	0.0372977	0.169589	0.045886	-0.00153219	-0.00915842	0.040534	0.0392665	-0.0721977	-0.00401953	-0.0270247	0.00132701	0.0229785	0.0661611	-0.0259456	0.0289084	-0.0121973	0.0854068	0.0444304	-0.00856027
72	48.24	0	-0.00315496	0.0611568	0.0358154	0.148264	0.103057	0.00705042	0.0637519	0.0432264	-0.040229	0.024902	-0.0227216	-0.0164926	-0.0269642	0.0496151	-0.0317108	-0.0126886	0.0201341	0.083116	-0.0317589	-0.0268077	-0.0232372	0.0671606	0.0225583	0.0500258
73	48.91	0	-0.00617999	0.0654714	-0.00188368	0.10414	0.129975	0.0245264	-0.0205674	0.0422786	0.00584893	0.0743377	0.0366202	0.0133051	-0.0676251	-0.00736454	-0.0269066	-0.00252289	0.0090678	0.0759137	-0.020182	-0.0540819	-0.0423345	0.0125823	0.0657957	0.0503219
74	49.58	0	-0.00779365	0.0622508	-0.00949666	0.0955972	0.139568	-0.00152416	0.0211459	0.0423783	-0.0655137	0.0511142	0.0745619	0.0268175	-0.0199149	0.0676411	-0.087929	-0.0166611	0.0266793	0.104359	-0.0188425	-0.0116798	0.0219559	-0.00244242	0.105608	0.0565011
75	50.25	0	-0.0161548	0.0540154	0.0210986	0.0476612	0.128862	0.0396692	0.0401754	0.0671833	0.00879109	-0.00336293	-0.0110692	-0.0128809	-0.0649782	0.0484209	0.0777748	-0.00148804	0.0168739	0.107593	-0.041013	0.0258863	-0.0118914	0.0803068	0.0809759	0.0299473
76	50.92	0	-0.013612	0.0282611	-0.0183893	0.0823736	0.151096	0.0146442	0.0490037	-0.00761926	0.0311	0.0851595	0.0398245	0.0186241	-0.0310864	0.0383342	0.118345	0.00534587	0.0489192	0.0898397	0.0127711	-0.000636584	0.00681553	0.107861	0.0203707	0.00196326
77	51.59	0	-0.00013886	0.0540942	0.0050941	0.0995463	0.151615	0.0205098	0.025712	0.0455223	-0.0100156	0.0528578	0.00587655	-0.033003	-0.00237437	0.0485682	-0.0211768	-0.00725541	0.0228319	0.0986171	0.00150544	0.0620466	0.0250141	0.0551517	0.0519359	0.0305024
78	52.26	0	0.00676207	0.0352792	-0.0220865	0.0515813	0.12378	0.00338456	0.0474269	0.107616	0.0451223	0.0188427	-0.000568062	0.055199	-0.0523462	-1.22097e-05	-0.0974849	0.00925396	0.0402996	0.0750411	-0.0543085	0.0115411	0.101772	0.0615198	-0.0112732	0.00184006
79	52.93	0	0.0081438	0.0400264	0.00290271	0.0886263	0.118138	-0.00675089	-0.0774068	0.0732279	-0.000559667	0.0503153	0.0409634	0.073425	-0.0229952	0.0822836	-0.0311046	0.0105213	0.0674996	0.0813499	-0.0307803	0.0308039	0.0271106	0.00872916	-0.0199863	0.0300315

## Sheet: 20210322_SS37122_Usnea
Taste responses of Usnea (SS37122) in pseudodessicated animals
Frame	Time (seconds)	Taste stimulus	20211116_Fly1_water	20211116_Fly1_sugar	20211116_Fly1_bitter	20211116_Fly2_water	20211116_Fly2_sugar	20211116_Fly2_bitter	20211116_Fly3_water	20211116_Fly3_sugar	20211116_Fly3_bitter	20211117_Fly4_water	20211117_Fly4_sugar	20211117_Fly4_bitter	20211117_Fly5_water	20211117_Fly5_sugar	20211117_Fly5_bitter	20211117_Fly6_water	20211117_Fly6_sugar	20211117_Fly6_bitter	20211117_Fly7_water	20211117_Fly7_sugar	20211117_Fly7_bitter
0	0	0	0.00428072	0.112592	-0.00636347	-0.000238371	-0.043898	-0.0293748	0.0317667	-0.0167441	0.0229375	0.025549	0.0220944	-0.0173116	0.0352481	0.0184479	0.0291786	0.0673646	0.0392952	0.00337703	0.0458185	0.0615423	0.0437746
1	1.2	0	-0.0497811	0.0517387	-0.0287571	-0.00213257	-0.0263773	-0.0155702	-0.032289	-0.0305224	-0.0078964	0.0545164	0.0400091	-0.00985676	0.0165172	0.0205163	0.0215358	0.038003	0.0452871	-0.00524456	0.0126023	-0.00160361	0.0115213
2	2.4	0	-0.0270586	0.0256907	-0.0126649	0.010187	0.00464962	0.00701199	-0.0329794	-0.0289266	-0.0025731	-0.00464396	0.0471101	-0.0134663	-0.00270716	0.0221834	0.016563	0.0413104	0.0594709	-0.0025742	-0.0152956	0.00949791	-0.00433969
3	3.6	0	-0.0250459	0.0242963	-0.00109913	0.0138255	0.00211965	0.0148421	-0.0164215	-0.0185287	-0.00868483	-0.00134387	0.0247244	-0.0244804	-0.00242281	0.0202756	0.00454251	0.0385445	0.056258	-0.0124043	-0.0123676	0.0305122	0.0174642
4	4.8	0	0.00633444	0.0495408	0.0253964	-0.00621375	0.00978849	0.0241894	-0.00229578	-0.0170768	-0.00335404	-0.00900719	0.0102416	-0.0329961	-0.0169372	0.0226069	0.0105319	0.0226836	0.0508059	-0.0303114	0.000425223	0.0635671	0.0173337
5	6	0	0.0289885	0.0478284	0.0145892	-0.0275868	0.00990262	-0.00399409	-0.00798887	-0.00564093	-0.00520016	-0.00527374	0.00203525	-0.0280231	-0.0228755	0.0390098	0.00803491	0.0199862	0.056357	-0.0405186	-2.77588e-05	0.0817931	-0.00453967
6	7.2	0	0.0401203	0.0460594	-0.00238965	-0.0161906	-0.0185442	-0.0165406	-0.0171974	0.00616909	-0.00918441	-0.00990306	-0.00127018	-0.00989313	-0.0170651	0.0200749	-0.00597984	0.0120255	0.0508798	-0.0430863	0.0116386	0.0825643	0.00628908
7	8.4	0	0.0165689	0.024619	-0.00829623	0.00267506	0.0283126	-0.00772675	0.0133206	0.0249577	-0.012725	-0.000111864	-0.00753357	0.0140968	-0.0205441	0.0168633	0.00491017	-0.00553754	0.047735	-0.0428998	0.00619239	0.0369173	0.0214525
8	9.6	0	0.00913426	0.0169921	-0.0065822	0.0260339	0.0119106	-0.00742237	0.00023573	0.0339193	0.0100528	0.00744706	-0.0140971	0.0371136	-0.0103747	0.00370903	0.00981373	-0.0140176	0.0333912	-0.0470908	-0.00480051	-0.00281883	0.0147348
9	10.8	0	0.0254832	0.023651	0.0240048	0.00339902	-0.00387164	0.015702	0.0136543	0.0155924	-0.00800968	0.00226065	-0.0130035	0.0301229	-0.0160445	0.00193534	0.00865839	-0.0265312	0.0165875	-0.032046	-0.00625691	0.0141754	-0.00809839
10	12	0	0.00979267	0.00490667	0.0471145	0.026078	-0.0047328	0.0188765	0.0177617	-0.00392408	0.0029039	0.00217165	-0.00207309	0.0410166	0.000401156	0.0111295	0.0110577	-0.0337213	0.00443398	0.00263564	0.0234757	0.0236983	0.0110966
11	13.2	0	-3.3733e-05	0.0150835	0.0175864	0.0320501	0.00655215	0.00163072	0.016262	0.00809443	9.30595e-05	-0.00216289	0.017299	0.0235973	0.00303083	0.013967	0.0124526	-0.0351927	-0.00961076	0.008694	0.0172262	0.0159375	0.0217099
12	14.4	0	0.000981867	0.0118186	-0.0100158	0.00548144	0.0334223	0.0129869	0.0210564	9.37462e-05	0.0113403	0.0114871	-0.013498	0.00493096	-0.0030079	0.0169356	0.00164388	-0.00307584	-0.0148075	0.0016633	0.0261631	0.0241432	0.00266548
13	15.6	0	-0.0140914	0.0131366	0.00205645	-0.0195664	0.00754988	-0.00401483	-0.00681729	-0.00101188	0.00348962	0.0154213	0.0065419	-0.0238355	0.00346037	-0.010385	-0.0165632	0.0508778	-0.0130154	0.00880566	-0.00915349	0.00692887	-0.0240421
14	16.8	0	-0.0320317	0.00836713	-0.0238468	-0.0168121	0.0153297	-0.0101067	-0.00303179	0.00260043	-0.00308171	0.0223176	0.00901133	-0.0302065	0.00715289	-0.0136858	-0.0075155	0.0658691	-0.00698334	0.000452482	0.00906607	-0.00488063	-0.00360029
15	18	0	0.012379	-0.00559925	-0.0210061	-0.0217027	-0.0211908	-0.0146733	0.00247286	-0.003484	-0.000107923	-0.012522	-0.000876695	-0.030125	0.0107436	-0.00450335	-0.0094317	0.0246299	-0.000994214	0.00930204	0.00489589	-0.0244418	-0.0132492
16	19.2	0	-0.0021323	-0.0299064	-0.021656	-0.0124272	-0.0123659	-0.0200116	-0.0328834	-0.00118395	-0.00114006	-0.0215035	-0.0135158	-0.00977559	0.00300518	-0.0068495	-0.00909447	-0.00857764	0.00202938	-0.00399757	-0.0298139	-0.0259281	0.01128
17	20.4	0	-0.000347488	-0.0414578	-0.0142375	0.00349985	-0.0206929	-0.00038982	-0.0284747	-0.0167771	-0.00548746	-0.0174699	0.0101149	-0.00572516	-0.00874159	-0.00854379	0.00879228	-0.0342782	0.0223603	0.00449045	-0.0356027	-0.0296328	0.00223798
18	21.6	0	-0.0294338	-0.0322251	0.0115566	0.0411747	-0.00156091	0.00458944	-0.0129968	-0.0149189	-0.0012009	-0.0194065	0.0216957	-0.00494495	-0.00751879	-0.00723885	0.00725906	-0.0446293	0.0271441	-0.0105016	-0.0233762	-0.0226697	-0.0152325
19	22.8	0	0.285921	-0.0285547	-0.0115593	0.400859	-0.00996828	0.02087	-0.0164426	-0.0159807	0.00721624	1.30336	0.00663508	-0.0293635	0.789974	0.00556296	0.0198923	0.421567	0.0439082	-0.0304555	0.563033	-0.0121969	-0.0347406
20	24	1	0.657697	-0.00436199	-0.0179987	0.531083	-0.0228352	-0.0076137	1.06866	-0.0196514	0.00646495	1.35919	0.023613	-0.0153777	0.861986	0.0207841	0.00489833	0.408428	0.0900499	-0.0428243	0.586937	-0.00776555	-0.0343287
21	25.2	1	0.649731	0.0816807	-0.024891	0.31188	-0.024475	-0.019247	1.05666	-0.0303685	0.00789333	1.23162	0.00700559	-0.0256309	0.717199	-0.000936572	0.00289909	0.361863	0.0541107	0.00104237	0.775873	0.00263241	-0.0369932
22	26.4	1	0.460488	0.0387779	-0.0258331	0.226346	-0.0160736	-0.0323592	0.820923	-0.027561	0.0107044	1.09071	0.00294387	-0.0490854	0.655492	0.0116757	-0.00081139	0.306266	0.0212704	0.0346816	0.792652	-0.0240427	-0.0263652
23	27.6	1	0.365327	0.0193708	-0.0256299	0.148974	-0.0151234	-0.0287024	0.630764	-0.0381968	0.00316344	0.825662	0.0210302	-0.00926206	0.735466	0.00647603	-0.0116194	0.233013	0.0242779	0.0115589	0.822117	-0.0165498	-0.0296004
24	28.8	1	0.206052	-0.00741697	-0.0378741	0.0839028	-0.015471	-0.0380535	0.541235	-0.0351186	0.011566	0.685323	0.00201761	0.00887648	0.595541	0.00815283	-0.00430402	0.183157	0.000233439	0.00278838	1.08268	-0.0404061	-0.0186445
25	30	1	0.104252	-0.0334228	-0.0130096	0.0613647	-0.0200084	-0.00659801	0.516936	-0.0304984	0.0230452	0.501505	0.00754061	0.0158889	0.675101	-0.00776713	-0.00920189	0.0979903	-0.0188697	-0.0211307	0.790686	-0.0371674	-0.000125108
26	31.2	0	0.0327212	-0.0554141	0.00578549	0.043692	-0.0304258	0.00835918	0.309381	-0.039455	0.00934562	0.272351	0.0246425	0.00647203	0.43335	-0.00279134	-0.00823525	0.0467266	-0.0112596	-0.0448019	0.452547	-0.04487	-0.0108285
27	32.4	0	-0.0284414	-0.0607632	-0.00773291	-0.00055359	-0.0290713	-0.0144049	0.160185	-0.030691	0.00797905	0.147109	0.00515398	0.00646594	0.267494	-0.00635249	-0.0028745	0.0126589	0.0340534	-0.0535581	0.224703	-0.0390891	-0.022
28	33.6	0	-0.0450729	-0.0499001	-0.0212352	0.00661052	-0.0288685	-0.0234345	0.116047	-0.011022	0.00404809	0.0931094	-4.68213e-05	-0.0155031	0.134239	-0.0178622	-0.00668891	-0.0128414	0.0578524	-0.0505768	0.129118	-0.0329048	-0.020188
29	34.8	0	-0.0527659	-0.0553817	-0.0277677	0.0302825	-0.037762	-0.0296755	0.110321	-0.00954215	0.005198	0.0553133	-0.0136787	-0.0246243	0.0910423	0.00683987	-0.0116425	-0.0223715	0.0657592	-0.0394094	0.0411717	-0.0223651	-0.0250895
30	36	0	-0.017129	-0.0628058	-0.0339937	0.0477065	-0.0361785	-0.0259707	0.0409948	-0.00287821	0.0173725	0.0658968	0.00303913	-0.0448852	0.0556615	0.0133073	-0.0110658	-0.0274248	0.064522	-0.0263982	-0.000666824	-0.0419583	-0.0244846
31	37.2	0	-0.0353106	-0.0480041	-0.0222653	0.0220735	-0.0333554	-0.0342236	0.00592118	-0.0124104	0.022599	0.0663751	-0.0180194	-0.0322212	0.027749	0.0022666	-0.0179708	-0.0260765	0.0437323	-0.0234913	-0.0136991	-0.0315953	-0.0427312
32	38.4	0	-0.0693751	-0.0390296	-0.00627549	-0.00356404	-0.00665026	-0.0299086	-0.0116522	-0.0112102	0.0120157	0.0634362	-0.00540235	-0.0350061	-0.00882955	0.00834229	-0.0194826	-0.0192574	0.0463516	-0.0235427	-0.0502195	-0.0328806	-0.0469386
33	39.6	0	-0.0870742	-0.0482905	0.0111018	-0.0186132	0.00659664	-0.0406623	-0.0257252	-0.0110263	0.00711929	0.023513	0.0185694	-0.032605	-0.0359501	0.00809271	-0.0114445	-0.0354595	0.0429544	-0.0537768	-0.0761278	-0.0357011	-0.0302799
34	40.8	0	-0.0836053	-0.0429878	0.0173601	0.00636107	0.0163258	-0.0121816	-0.0380393	-0.0108024	0.00753877	0.00665441	0.0217087	-0.0515659	-0.0344649	0.000963825	-0.0200566	-0.051837	0.0403947	-0.0356303	-0.0857763	-0.0352393	-0.0338501
35	42	0	-0.0984638	-0.0558085	0.00144504	-0.0217809	0.0334587	-0.00506128	-0.0343401	-0.010706	0.00489404	-0.0246711	0.0254905	-0.036667	-0.0471317	0.00488821	-0.0446527	-0.0733523	0.0330417	-0.0472742	-0.0754476	-0.042854	-0.0330778
36	43.2	0	-0.09734	-0.0373638	-0.0154158	-0.0110519	0.0250548	0.0276938	-0.0370474	-0.0210988	0.00500649	-0.0267361	0.0492435	-0.041447	-0.0680697	0.0126629	-0.0342877	-0.0726242	0.0107198	-0.0590582	-0.0801871	-0.0443145	-0.0301475
37	44.4	0	-0.118044	-0.0168556	-0.0229679	-0.00245021	0.0347825	-0.0113269	0.000530405	-0.0155102	0.0215661	-0.0148024	0.0531967	-0.0391975	-0.0508063	-0.00288164	-0.032178	-0.0753921	0.00625677	-0.0591845	-0.0851154	-0.0426397	-0.0399676
38	45.6	0	-0.114894	-0.019028	-0.0420022	0.011447	0.026066	-0.0274784	-0.00309308	-0.0191455	0.0198992	-0.0155017	0.0371074	-0.0366213	-0.0647759	0.00911428	-0.0427877	-0.0756599	-0.00248732	-0.0612564	-0.0789627	-0.0376891	-0.0289233
39	46.8	0	-0.115435	-0.0361274	-0.0455508	0.0202425	0.00038448	-0.0284481	-0.00695687	-0.0139752	0.0115906	0.00803737	0.0313657	-0.0533878	-0.0478214	0.00153102	-0.0482453	-0.0877849	-0.00424548	-0.0339045	-0.0721184	-0.0190942	-0.0267543
40	48	0	-0.11007	-0.0406781	-0.0409151	-0.014357	0.00675652	-0.0302854	0.00763225	-0.0289955	0.000153653	0.00436318	0.0240635	-0.0440371	-0.0456975	0.0113041	-0.0337782	-0.0811708	-0.010977	-0.00895596	-0.0889501	-0.0155103	-0.0211296
41	49.2	0	-0.0820127	-0.0535816	-0.0446865	-0.0297843	-0.00980565	-0.0420987	-0.0107176	-0.0237983	0.00559402	-0.00120034	0.0388427	-0.0377856	-0.0455474	0.0036113	-0.0385285	-0.0864888	-0.00680031	-0.0149809	-0.0908943	-0.0210969	-0.0145806
42	50.4	0	-0.0868998	-0.036315	-0.0342014	-0.0266041	-0.00918783	-0.0518024	-0.0297019	-0.0325594	0.00176761	-0.00842312	0.0162444	-0.027833	-0.0584592	0.00594656	-0.040483	-0.0752127	-0.00741076	-0.00256673	-0.0923516	-0.0425469	-0.0097373
43	51.6	0	-0.0650108	-0.0395596	0.0173048	-0.0404704	-0.0105621	-0.053096	-0.0409401	-0.0366718	-0.00330416	-0.00539149	0.0455415	-0.0411625	-0.0361771	-0.00339015	-0.0153103	-0.0577231	-0.000118786	-0.0082849	-0.0979617	-0.0298222	-0.0225821
44	52.8	0	-0.0538865	-0.0363625	0.0479838	-0.0410957	0.0319874	-0.054218	-0.0466	-0.0353594	0.0016897	-0.00686872	0.0503843	-0.0407989	-0.0519382	0.0156234	-0.0279958	-0.0382092	0.0159583	-2.8096e-05	-0.0778433	-0.0228748	-0.0287006
45	54	0	-0.0569666	-0.0517336	0.0684907	-0.044209	0.038243	-0.0544501	-0.0488562	-0.0297517	-0.00561029	0.00748398	0.0418583	-0.030882	-0.0486034	0.00489133	-0.0301063	-0.0244309	0.0262824	-0.011551	-0.0995732	-0.0359722	-0.00987014
46	55.2	0	-0.0816589	-0.0389778	0.0499159	-0.0502763	0.0115063	-0.0582675	-0.03569	-0.0340309	-0.0076498	0.0130019	0.0248194	-0.037037	-0.041325	0.0116746	-0.0224836	-0.0216092	0.0394801	-0.00831539	-0.0991856	-0.0242548	-0.0216828
47	56.4	0	-0.0951711	-0.0430957	0.0379365	-0.0534193	-0.00494054	-0.0670747	-0.0261181	-0.00232763	0.00070376	-0.0133597	0.0505309	-0.0233479	-0.0587482	0.00480881	-0.0280221	-0.0181496	0.0398332	-0.00815369	-0.095219	0.000475655	-0.027526
48	57.6	0	-0.0919382	-0.0609813	0.0161626	-0.0470879	-0.00846355	-0.0689447	-0.0409569	0.0180524	0.00720358	0.00416745	0.0370858	-0.0230158	-0.0532347	0.0219515	-0.0387932	-0.0240608	0.0454318	-0.0123715	-0.10343	-0.0309033	-0.0401426
49	58.8	0	-0.0881684	-0.065969	0.00582517	-0.0381393	-0.0136479	-0.0762008	-0.0391059	-0.00601331	0.0137564	-0.0203146	0.0299504	-0.00855556	-0.0430318	0.0103065	-0.0481849	-0.0289021	0.05367	-0.0184068	-0.0965822	-0.0197572	-0.0441991
50	60	0	-0.0884692	-0.0607102	-0.0138693	-0.0297458	-0.0151261	-0.077265	-0.0392888	-0.00452961	0.0350882	0.0161174	0.011304	0.0167903	-0.0404303	0.0141684	-0.0481963	-0.0327259	0.0309111	-0.0363628	-0.074815	-0.0266702	-0.038726
51	61.2	0	-0.0769587	-0.0482801	0.000405569	-0.0144792	-0.0276125	-0.0736499	-0.0424642	-0.0165095	0.00191819	0.0140151	0.0291429	0.0110223	-0.0528063	0.0201864	-0.0452852	-0.0387213	0.00537199	-0.0480828	-0.0791659	-0.0328204	-0.0601399
52	62.4	0	-0.0884761	-0.0502956	0.0382885	-0.0029718	-0.000309156	-0.0723739	-0.0416358	0.0114939	0.0060519	0.00364536	0.0217717	0.000439612	-0.0572882	0.0220893	-0.0562779	-0.0452727	0.0178944	-0.0602478	-0.0863226	-0.0309742	-0.0390448
53	63.6	0	-0.10723	-0.0456073	0.0434216	-0.0110758	0.0402864	-0.0762827	-0.0453021	-0.0179733	-0.00428326	-0.0091189	0.00622597	0.00188577	-0.0555748	0.0351137	-0.0646779	-0.0418981	0.0287295	-0.0613565	-0.0851652	-0.0357814	-0.0622072
54	64.8	0	-0.125802	-0.0499295	0.0235751	-0.0162845	0.00989285	-0.0780657	-0.0452397	-0.00882723	0.00710412	0.0233604	0.00382688	-0.014828	-0.0615547	0.0219221	-0.0585666	-0.0349376	0.0390205	-0.0610696	-0.0903217	-0.0287274	-0.0601526

## Sheet: 20210910_SS47744_Roundup
Taste responses of Roundup (SS47744)In pseudodessicated animals
Frame	Time (seconds)	Taste stimulus	20210910_Fly1_water	20210910_Fly1_sugar	20210910_Fly1_bitter	20210910_Fly2_water	20210910_Fly2_sugar	20210910_Fly2_bitter	20210910_Fly3_water	20210910_Fly3_sugar	20210910_Fly3_bitter	20210910_Fly4_water	20210910_Fly4_sugar	20210910_Fly4_bitter	20210910_Fly5_water	20210910_Fly5_sugar	20210910_Fly5_bitter	20210910_Fly6_water	20210910_Fly6_sugar	20210910_Fly6_bitter	20210910_Fly7_water	20210910_Fly7_sugar	20210910_Fly7_bitter	20210910_Fly8_water	20210910_Fly8_sugar	20210910_Fly8_bitter
0	0	0	-0.0180906	0.021304	0.0262863	0.0752485	0.0565932	0.0072715	0.0798228	0.0302548	0.0103187	-0.0470615	-0.0295089	-0.00923197	0.0407228	0.00832052	0.0207659	0.0398027	0.0490277	0.0432592	0.012113	0.0485031	-0.0418631	0.00396367	-0.0536481	-0.0287297
1	0.67	0	0.000903438	-0.0138449	0.0278075	0.00850206	0.0416601	-0.000912314	-0.00133381	0.0786144	-0.00211494	-0.0410611	-0.020948	-0.0589577	-0.0247417	-0.0617582	-0.0245001	-0.0171309	-0.040807	-0.0167806	0.0856193	-0.111745	-0.12121	-0.107434	0.0832313	0.0665198
2	1.34	0	0.0347916	0.0268709	-0.0865041	-0.0258231	0.00970623	0.0427196	0.0312633	0.0458178	-0.0621097	-0.0396717	0.025396	-0.00634573	-0.051012	-0.119617	-0.0697867	0.0479744	-0.0496451	-0.0329915	-0.0280967	-0.0708671	0.030122	0.0276938	0.0697915	0.0433562
3	2.01	0	0.00249692	0.0519396	0.072151	0.0117154	-0.00945324	0.0960893	-0.0277528	0.0470718	0.0244654	-0.00634605	0.0342192	0.00360599	0.059283	-0.0407415	-0.0184967	0.0438772	0.0955399	0.0278495	-0.0117846	-0.0350419	0.0173324	0.0559053	0.0215006	-0.00951105
4	2.68	0	-0.00582731	0.0144698	0.020582	0.0630278	-0.0374449	-0.090523	-0.0317478	0.00739083	-0.0529986	0.0461466	0.0272579	0.0470489	-0.0158195	-0.0776859	-0.0233412	-0.00494124	-0.0975829	-0.0327905	0.0564641	0.0246295	-0.0557209	0.0184965	-0.0014558	0.0534783
5	3.35	0	0.0516984	0.109043	-0.00368955	-0.0152624	0.021163	-0.0117796	0.00567511	-0.00542961	-0.00447174	0.00665893	-0.0496438	-0.0523124	-0.0457812	0.00697461	-0.0184029	0.0224235	-0.0335102	0.00211207	0.0271858	0.0733825	-0.0258991	-0.0112648	0.101328	0.0765639
6	4.02	0	0.0979795	0.111936	-0.0137711	0.0299089	-0.0502488	0.0431514	-0.0616019	-0.00905367	-0.0338373	0.0709658	0.0360225	0.0674252	-0.0379637	-0.0321961	-0.0871361	-0.0338755	-0.0321125	-0.0105324	-0.0390405	-0.0714926	-0.0610565	-0.0260286	0.068208	0.107864
7	4.69	0	0.0207933	0.0862014	-0.0214582	0.0418683	0.021995	-0.0496727	-0.0575028	-0.0134335	0.041035	0.0150804	-0.00751794	0.0156916	-0.0142744	0.00856544	-0.0363563	-0.0372153	-0.00543743	-0.0179114	0.0548574	0.0743737	-0.0112667	-0.019782	-0.0305882	0.0678885
8	5.36	0	0.0585625	0.0126492	0.046439	0.0014168	-0.0329514	0.0494621	-0.0486684	-0.0258557	-0.0631865	0.0134218	0.0163927	0.00893401	-0.0148498	-0.00279489	-0.0193266	0.0560481	-0.0525902	-0.00241225	-0.00905564	0.0186241	-0.0231893	-0.00398179	0.105885	-0.0135018
9	6.03	0	0.0788403	0.00641271	0.0659146	0.0320297	-0.0222026	-0.0723124	0.0195581	0.0141232	-0.00202703	0.00325553	-0.0418088	0.047367	-0.0150722	-0.0148064	-0.00147922	0.0121767	-0.00497773	-0.0227648	-0.00837368	-0.0197448	-0.00703331	-0.0351505	0.159794	-0.110122
10	6.7	0	0.0227251	0.0334337	0.0162432	-0.0514845	-0.0576213	-0.073851	-0.0365651	-0.0227828	-0.00367147	-0.0302223	0.0150254	0.0213178	0.0188999	0.0645971	0.0498452	0.0914822	-0.00476923	0.0123986	-0.0324049	0.0830322	-0.0135446	0.0433918	-0.0606267	-0.0601734
11	7.37	0	0.0257281	0.028742	0.00714492	-0.0215901	-0.0805934	0.0641012	-0.0227069	0.0406371	-0.00622098	0.0244375	0.00633352	-0.054006	-0.0207493	0.0569166	0.0142053	-0.0351183	-0.0431182	-0.00884387	-0.0388666	0.0721336	0.0972032	-0.0559197	-0.0536641	0.0371313
12	8.04	0	-0.020941	0.0279694	0.0474862	-0.0464862	0.00168786	0.018035	-0.0344058	0.000269508	-0.00778706	0.0190145	0.0354246	-0.0105553	-0.00882442	0.0282022	0.0190753	0.0772993	-0.0268395	0.0252574	-0.0335043	0.0637391	-0.0326177	-0.0340599	-0.022669	-0.0204615
13	8.71	0	0.0277133	-0.0568802	0.0455294	-0.00647028	-0.0392654	0.0499428	-0.0410084	-0.0157084	-0.0442422	0.0586215	-0.0780967	-0.0522635	0.0346221	-0.00713002	0.0394495	-0.00883843	-0.0556379	-0.03309	-0.0553886	0.0449926	-0.0325692	0.00509176	-0.0845935	-0.036344
14	9.38	0	0.0412933	-0.014769	0.080777	-0.0692458	0.0694601	-0.0412004	0.00825673	0.00806702	-0.00254511	-0.0351928	-0.00491714	0.0358205	-0.024003	0.0628128	-0.0128012	-0.0288421	0.0656032	0.0213347	0.0424068	-0.0644651	0.00619044	-0.0299406	0.0118968	0.0971487
15	10.05	0	-0.0576057	-0.0863279	0.0439063	-0.0303918	0.0413938	-0.0473605	-0.0294044	0.00123196	0.0737119	-0.0405602	-0.0170282	0.0311482	-0.00481062	0.00365149	0.00747204	-0.0565064	-0.0405522	-0.0535922	-0.00392632	-0.0225445	0.0396151	-0.049753	0.0658169	0.00725907
16	10.72	0	0.0220456	0.0204737	0.00275353	-0.0549347	0.0114507	-0.00487446	0.0602801	-0.00652856	0.0464014	-0.0320072	-0.00363936	-0.00691255	-0.0294357	0.0145512	0.00712906	-0.0676145	0.00244132	0.120045	0.0208863	-0.0253002	0.00025297	0.0263089	0.0667727	-0.0446595
17	11.39	0	-0.097212	-0.00445166	-0.0361614	-0.0161883	-0.000559947	-0.00652448	0.0282547	-0.0418862	-0.0112728	0.0550697	0.0600588	-0.0227586	-0.013551	0.0184229	0.0608471	-0.0788864	0.140217	0.0234609	-0.0554351	-0.0415068	0.0628426	-0.00145965	-0.117831	-0.0664557
18	12.06	0	-0.043707	-0.0812273	-0.0985286	0.0291096	0.0168384	-0.0341579	0.0332436	-0.0588593	0.0702697	0.0415365	0.0563381	-0.031192	-0.045255	-0.00444284	0.0136277	-0.0309533	0.0323696	0.0383419	0.0541235	-0.0134118	0.00414891	0.0715806	0.0593749	-0.070132
19	12.73	0	-0.0509658	-0.00414451	0.000718872	-0.0339583	-0.0174775	-0.0167632	0.0730308	-0.0670414	0.0212584	-0.0621426	-0.0609834	0.0065968	-0.0155246	-0.0168273	0.025454	-0.0691906	0.0310685	-0.0271047	0.0601453	-0.0257685	0.010806	0.0836048	0.00648772	-0.208216
20	13.4	0	-0.0523669	0.0310096	0.0144319	-0.0559925	0.0722831	0.0279018	0.052794	-0.0510448	0.0100391	-0.0330987	0.0456735	0.00364635	0.0364054	0.00782725	0.0226428	0.0117704	-0.0280326	0.0412472	0.00385163	-0.0260394	-0.0108345	0.0299993	-0.0479125	0.110086
21	14.07	0	-0.0859955	-0.014809	-0.102619	0.0136054	-0.00621256	0.031003	0.0427619	-0.00314022	0.0272511	-0.00822612	-0.0345778	-0.0222132	-0.0121099	0.0509236	-0.000338134	0.0343266	0.0535823	-0.0328214	0.00952907	0.0054404	0.0199676	0.0005335	0.0310937	0.0385993
22	14.74	0	-0.083326	-0.0226886	0.00503161	-0.0196767	0.00330053	0.0840268	0.0218882	-0.0162906	-0.0097634	0.0448497	-0.00272582	-0.0139258	0.0455623	0.00902519	0.0222529	0.0189824	0.0211099	-0.0453874	0.0304207	0.0560779	0.113134	0.0352023	0.0131224	-0.129304
23	15.41	0	0.0421005	-0.0395801	-0.0495042	0.011029	-0.0413353	-0.00052862	-0.0519985	0.0126587	0.00534824	-0.00419108	0.00661765	0.0101336	0.0625621	0.00240441	-0.0171827	0.020573	-0.0232435	0.00963774	0.0140137	-0.0462488	0.00691585	-0.0548945	-0.154642	0.134337
24	16.08	0	0.0175401	-0.129355	0.00637185	0.0141035	-0.0180375	0.0548955	0.0403821	0.0165584	-0.0108069	-0.000445127	0.0399011	0.083515	0.0357266	-0.000911587	0.0371314	0.00667568	-0.0109395	-0.0338284	-0.0415332	0.028843	0.0442306	0.042879	-0.0717657	0.0312534
25	16.75	0	-0.0155646	-0.0676574	-0.0338787	0.0600497	0.0456683	-0.0687901	-0.024554	0.0164367	-0.00141183	-0.0242245	-0.00808619	-0.0127308	0.014026	0.00288775	0.013969	0.0322133	0.0152188	0.0149038	-0.101482	-0.065977	-0.00851868	-0.0468729	-0.0297842	-0.0132453
26	17.42	0	-0.0136097	-0.0467195	-0.0834601	0.0558905	0.000203465	-0.0493492	-0.0279609	0.0179227	-0.0116314	0.00539241	-0.0451791	-0.0288453	0.0459679	0.0328285	-0.0247191	-0.0465126	0.0436173	-0.0089962	-0.0127241	0.0463821	-0.00743761	0.0318906	-0.135122	-0.0606299
27	18.09	0	-0.0206133	-0.00338708	0.00812029	0.0499724	-0.00585076	0.0319645	-0.0264121	0.0409984	-0.0582549	-0.0367118	0.0299842	0.0167197	0.0543321	0.00296677	-0.00247813	-0.0343011	0.0619437	-0.0164243	0.0287404	0.0127305	0.00712258	0.014626	-0.0156133	0.106458
28	18.76	0	0.0353423	-0.0842616	-0.0611568	0.0499906	-0.00272335	-0.074016	-0.00313031	0.00699879	0.0189162	-0.0122482	0.0163341	-0.00771232	0.017571	0.00805383	-0.0235581	0.0155226	0.00161303	-0.037306	-0.0281048	0.0909167	0.00879189	-0.0637629	-0.0984917	0.0239179
29	19.43	0	-0.0168061	0.141601	-0.195158	-0.0401776	0.0129477	0.00984225	-0.00683819	-0.00652504	-0.0342915	-0.000351588	-0.00114073	0.023188	0.0500307	-0.0582227	-0.0500166	0.0695597	0.00742594	-0.0703089	-0.0112295	0.00540298	0.081814	-0.0129791	0.0233409	0.0238914
30	20.1	1	-0.0390188	-0.00653783	-0.0784137	0.0769424	-0.0330801	-0.0073684	-0.0307724	0.025436	-0.0261558	0.00339694	-0.0234904	0.0185072	0.0305622	0.0179925	-0.00546892	-0.0232829	-0.0490801	0.0209886	0.0221123	-0.00876257	0.0553205	0.117081	-0.0799403	-0.0676069
31	20.77	1	-0.0104393	0.124105	-0.139583	0.015583	-0.0381677	-0.0133499	-0.0700207	-0.0117364	0.0263444	0.0433579	0.063104	0.00282073	0.0592158	0.0133975	-0.0537671	0.00910873	0.0243189	-0.0388274	-0.0304346	-0.0680755	0.0299763	0.174329	-0.0459796	-0.0403377
32	21.44	1	0.0381343	-0.0396611	-0.125743	-0.0100663	0.170928	-0.155986	-0.0645118	0.22775	0.0130694	0.00171026	-0.0282754	0.0537534	0.0445308	0.477833	-0.006622	0.0276438	0.33691	0.0420594	0.00102988	0.104959	0.0427302	-0.0184801	-0.0201126	0.0923475
33	22.11	1	0.00373437	0.671666	-0.0577816	-0.0158707	0.217301	-0.0988115	-0.0679784	0.297688	0.0448445	0.265435	-0.0366806	0.122414	0.0579813	0.479899	0.083922	-0.0235685	0.335571	0.0803838	0.0563567	0.00395662	0.177471	0.0767129	0.25382	0.112762
34	22.78	1	-0.0013649	0.70172	-0.15226	0.0865719	0.168872	-0.0282746	-0.03306	0.203726	0.00511031	0.335534	0.0564588	0.115289	0.0981114	0.466712	0.129093	0.0240245	0.267659	0.0634982	0.094627	0.0755196	-0.00377198	0.0427481	1.10022	0.127974
35	23.45	1	-0.0348594	0.781706	-0.117395	0.129122	0.0935404	0.0281226	-0.000292834	0.160714	0.02037	0.253935	0.000434875	0.173494	0.0589229	0.398561	0.0690737	0.00324158	0.301897	0.0460828	0.0150258	-0.0313664	0.120783	0.00358547	1.00808	0.179979
36	24.12	1	-0.0276491	0.334257	-0.134375	0.0386429	0.0113394	0.0305339	0.0498	0.139237	-0.018403	0.208949	0.43647	0.0921769	0.0754363	0.310526	0.0559406	0.084	0.196156	0.074237	0.0337488	0.0450292	0.0847068	-0.00351678	0.856278	0.183267
37	24.79	1	-0.0854176	0.286852	-0.113678	-0.0172722	-0.0349715	0.056662	-0.0366755	0.0868862	-0.0397396	0.917318	0.685193	0.0756693	0.0880849	0.20899	0.0347081	0.0141187	0.190358	0.0592269	0.0575465	-0.0338028	0.0671036	0.0559134	0.567944	0.0874442
38	25.46	1	-0.0515514	0.245003	0.00550649	0.0557586	-0.0372992	-0.00329824	-0.0254223	0.0269665	-0.00222502	0.818542	0.620502	0.0467863	0.0542393	0.182328	0.0831699	0.0452841	0.177092	0.0577976	0.0514786	0.00474483	0.096681	-0.0089345	1.92411	0.216521
39	26.13	1	-0.0728569	0.0910382	-0.0401648	0.0780618	-0.143669	-0.0116188	0.0164565	0.10323	0.0224562	0.508291	0.564672	0.169417	0.0704494	0.20199	0.07448	0.003155	0.151331	0.0452508	-0.0432241	0.0185092	0.0872897	-0.0119141	2.45119	-0.00377445
40	26.8	1	-0.0352122	0.197431	-0.0221012	0.066124	-0.164358	0.0136976	0.0408282	0.104366	0.0184188	0.351993	0.446788	0.128932	0.0469586	0.0888555	0.0811385	0.0686027	0.144247	0.0395162	-0.0362231	0.0830742	-0.00396567	0.156882	1.51719	-0.0530768
41	27.47	0	-0.00524629	0.0430319	-0.0131127	0.0527717	-0.17291	-0.0283123	-0.0461705	0.0715728	0.0116974	0.23171	0.276648	0.0871074	0.0203337	0.104748	0.119774	0.0377463	0.111823	0.0164705	0.0330924	0.0221168	0.0201356	-0.0162288	1.00923	0.0452437
42	28.14	0	-0.0448901	0.0675746	-0.0493518	0.0364665	-0.0893419	-0.0290288	-0.0697878	0.0738433	0.0241836	0.194063	0.241346	0.150023	0.0719434	0.104393	0.0992991	0.0390132	0.103777	-0.069956	0.0108902	0.0957228	0.137986	0.0280557	0.666845	-0.0637211
43	28.81	0	0.0509	-0.0480108	-0.106897	0.0417399	0.083244	-0.0115279	-0.0210304	-0.053342	-0.00821277	0.118235	0.219863	0.0868383	0.0285312	0.0484302	0.185089	0.0354882	0.131216	-0.0319599	0.0554967	0.0874395	0.0852033	0.143279	0.403609	-0.105625
44	29.48	0	-0.124346	0.00206814	-0.0633395	-0.0133898	0.08184	0.178118	-0.0672024	-0.0430532	0.0492925	0.110572	0.113379	0.0966001	0.0110949	0.0928813	0.15014	0.00865567	0.0878377	0.08275	0.0394427	0.0828703	0.0867365	0.082774	0.468165	-0.0657276
45	30.15	0	-0.0225709	0.0279762	-0.0980951	-0.0451611	-0.106322	0.031648	-0.0524144	0.0321108	0.07698	0.0190454	0.0917621	0.0903014	0.137564	0.00572575	0.21892	0.0278255	0.0696367	0.0238574	0.0197511	0.0605377	0.042397	0.00655747	0.269352	-0.140346
46	30.82	0	0.00151379	0.140635	-0.0322676	-0.0696389	0.00695262	0.0896535	0.0132973	0.00112576	0.0475224	0.00224618	0.0901226	0.0554448	0.062262	0.0368561	0.133966	-0.074741	0.124972	0.118469	0.0609407	0.0259858	-0.0727497	-0.0971618	0.21268	-0.0141142
47	31.49	0	0.00120146	0.0277523	-0.000388637	-0.0433432	0.029359	-0.039504	0.0284119	0.0103554	0.0144449	0.0612838	0.0685659	0.0354143	0.0485666	-0.0349514	0.123104	0.0547537	0.0207343	0.00795326	0.0536107	0.0226179	-0.0445139	0.00518874	-0.0306277	0.0536191
48	32.16	0	-0.00711453	-0.0758169	-0.114475	-0.00323353	-0.0159961	0.0104709	-0.0126192	-0.0427665	-0.0269409	-0.00350024	0.0716416	0.022187	0.0393491	0.0756157	0.124436	-0.0387649	0.0659892	-0.0441674	0.00981729	0.000969321	0.00217417	-0.0718133	0.148734	-0.0173609
49	32.83	0	-0.0145327	0.0593361	-0.0429366	0.0128374	-0.076281	-0.18264	0.0348457	-0.0505772	-0.0525337	0.0111794	-0.0165826	-0.00701479	-0.00768139	0.00930323	0.0646999	-0.0418213	0.0449157	0.0748259	-0.0157139	-0.0185364	0.0062626	0.0421938	0.121464	-0.182926
50	33.5	0	0.012882	-0.00882766	0.00483547	-0.0266665	-0.0389432	-0.0331967	0.0208008	-0.07559	-0.0161977	0.0476132	0.030615	0.080918	-0.00295649	-0.0415354	0.0556702	-0.0186824	0.0452748	0.0888463	-0.0137523	-0.0269093	0.0766799	-0.0835135	0.0850376	-0.011521
51	34.17	0	-0.0248971	-0.027521	-0.115131	0.0247847	-0.0402145	0.125293	-0.0640192	-0.0273302	-0.0164315	-0.0125969	0.0526839	0.0192722	-0.0111996	0.0372143	0.0768166	-0.00544851	0.0460578	-0.0307852	0.00722738	-0.0795606	0.0633122	-0.0958081	0.0759943	0.0356777
52	34.84	0	-0.072851	-0.0280491	-0.0902162	0.0151682	-0.0137209	-0.0481596	0.00971458	-0.0561621	0.0106337	0.0150825	0.0271563	0.0577414	0.074074	0.0512578	-0.00270832	-0.0472165	-0.0029826	-0.0667747	0.0509618	-0.00689319	-0.016983	0.0168607	0.0311749	0.0987394
53	35.51	0	-0.0812518	-0.039292	-0.047357	0.0887717	-0.0532747	0.0902645	-0.0232553	-0.000256629	0.0186646	-0.0491222	-0.0431273	-0.0174798	0.0460163	0.0188692	0.0132278	-0.0407757	-0.00554499	0.0719435	0.0621815	-0.0121268	0.0123633	0.0317808	0.0943989	-0.102235
54	36.18	0	-0.113586	-0.00567261	-0.0306216	-0.0220553	-0.077278	-0.0145682	0.00547794	-0.000693799	-0.0592145	-0.0687303	0.0526936	-0.00580144	-0.0310009	0.0132662	0.0580453	-0.019997	-0.00583934	-0.036702	-0.0344299	0.0767251	0.138742	-0.0781461	-0.127731	-0.0764847
55	36.85	0	-0.147689	-0.0187033	-0.0976695	0.0631745	-0.109917	0.0518769	-0.033869	-0.00797441	0.00622613	0.0104735	0.038012	-0.0120063	-0.0581164	0.0480884	0.0775152	0.017794	0.0388393	-0.051419	0.014339	-0.0498683	0.0616467	0.038215	0.0284836	-0.0195985
56	37.52	0	-0.126153	-0.0349384	-0.0672681	0.0159431	-0.047908	0.11552	-0.0127989	-0.0588557	-0.00364063	0.00537537	0.0565855	-0.0171404	-0.0174916	-0.0159235	0.0248348	0.0538388	-0.0627824	-0.020634	0.0531184	-0.0288512	0.0521196	0.0229048	-0.0321136	-0.0521523
57	38.19	0	-0.0617521	-0.0620122	-0.121208	-0.0133473	-0.0453801	-0.00848811	-0.0142301	-0.00630264	-0.0246364	-0.0648627	-0.0200528	-0.0262224	0.0204425	0.0252808	0.0321691	-0.0296412	-0.000999443	0.00459621	-0.00291103	-0.0367927	0.0685171	-0.119033	-0.0170906	0.0883916
58	38.86	0	-0.0344246	-0.0574808	-0.0739233	-0.0339627	-0.00488405	0.103886	0.0675082	-0.00580749	-0.00323142	-0.0304584	0.00406048	-0.0157798	-0.0302616	-0.0166417	0.0713198	-0.047565	-0.0846326	-0.0381106	0.0185605	-0.0434914	0.0383916	0.0462646	-0.0286025	0.0498582
59	39.53	0	-0.0470707	-0.0635479	-0.0927941	0.0176786	-0.0615226	-0.0210678	0.0143907	0.0162855	-0.0185119	-0.0384222	-0.0235146	-0.124144	0.0546927	0.00180649	0.00785312	-0.0146991	0.106659	-0.039867	0.0111666	0.0371603	0.00829698	0.0647158	-0.0749643	0.128034
60	40.2	0	-0.0771299	-0.033298	-0.0504111	0.057626	-0.0649434	-0.0908158	-0.00637804	-0.0623472	-0.0356394	0.0327603	0.0267396	-0.010641	0.0129726	0.068664	-0.0114882	0.026803	0.0661996	-0.0159876	-0.0323048	-0.0473665	-0.0427179	-0.0453292	0.0406746	0.0427483
61	40.87	0	-0.0486688	-0.0823259	-0.00370386	0.0334111	-0.0633708	-0.0464926	-0.0377156	-0.0105261	-0.00214329	-0.0249532	-0.0820016	-0.0460779	0.0306383	0.0681478	-0.0526142	0.0387958	0.0476844	0.0141819	0.0150547	-0.0574992	0.0613005	0.0619364	-0.0399061	-0.134596
62	41.54	0	-0.0313883	-0.0216015	-0.086561	0.0717262	-0.147837	-0.0334913	0.0214306	-0.0487678	-0.0684553	-0.0646714	-0.0313718	-0.0230894	-0.0402862	0.0391337	0.000345876	-0.077105	0.0520798	-0.00491122	0.0498052	0.00385001	0.075817	0.108365	-0.184619	0.150576
63	42.21	0	-0.10079	0.00067948	-0.0829514	0.0691785	-0.046495	-0.0961546	-0.0174359	-0.0589974	-0.0622212	-0.0616321	0.0569138	0.00276643	-0.00582477	0.00441742	0.0383139	0.0314609	0.0338357	-0.0259397	0.0473702	-0.00134346	0.000201184	-0.11761	-0.00246061	-0.0521131
64	42.88	0	-0.00733882	-0.0389848	-0.0862172	0.00976466	-0.0084508	0.03946	-0.118754	-0.0277697	-0.0229654	-0.00577408	-0.0663346	-0.0141632	-0.0397569	0.00797058	0.003003	0.0343555	0.0345228	0.0875204	0.0488108	0.00498028	0.04789	-0.144454	0.00953687	-0.00192961
65	43.55	0	-0.0229528	0.0506017	-0.0727934	-0.034938	-0.00909838	0.0216583	-0.0577951	-0.0128919	-0.0567969	-0.0226344	0.0128727	0.0129339	0.0810708	-0.0363218	0.02506	-0.0476418	-0.0459379	-0.0208767	0.103872	-0.100273	0.050611	0.0337172	0.0581573	0.0521492
66	44.22	0	-0.0554811	-0.0811326	-0.0842876	-0.0345111	-0.0675334	0.0884361	-0.0205948	-0.00304332	-0.0220059	0.0706922	0.00439427	-0.0546798	-0.0165027	0.0427643	0.0503393	0.010901	-0.0268133	0.0248888	0.0127402	0.0445399	0.0623273	0.00487366	0.00949377	0.0789075
67	44.89	0	-0.042487	-0.0614316	-0.0384495	-0.00531529	0.0824457	0.130943	-0.0128565	0.00258698	-0.0139169	0.0163822	0.0355164	-0.00742504	-0.0347953	-0.00730597	0.0156131	-0.00615218	0.0377031	-0.012421	0.0535119	0.0404671	-0.0320514	0.0617973	-0.0901537	0.137042
68	45.56	0	-0.0296709	-0.0859327	-0.0418386	-0.0534873	0.31401	-0.00560615	-0.073489	0.0251823	-0.0316883	0.0300658	0.0271612	0.0450066	-0.0286855	-0.010281	1.88507e-05	-0.000909402	0.0376364	-0.0424686	0.032819	0.0757056	-0.00749012	-0.0446134	0.0345386	0.129136
69	46.23	0	-0.0532143	-0.0840823	-0.0538379	-0.0119198	0.255761	0.104575	-0.0876557	0.0056421	0.0269602	0.00471191	0.0355225	0.051453	0.0565738	-0.00814654	0.00821829	-0.0151814	-0.0612845	0.0785775	0.0265943	0.0520652	-0.0255997	0.0813185	0.0586034	0.0223904
70	46.9	0	-0.0947092	-0.0498632	0.0573423	-0.0163871	0.213975	0.0757963	-0.0765475	-0.0830337	0.00462411	0.0153446	-0.0576992	-0.0399101	-0.0415923	-0.0408114	0.0347836	0.0648196	0.0737871	-0.0142011	0.0260645	-0.00692706	-0.0480228	-0.0141416	-0.0942651	-0.0608624
71	47.57	0	-0.0506067	0.0402317	-0.0202034	0.034757	0.154699	-0.0180464	-0.0383116	-0.0119659	0.0516768	0.0115606	0.0138197	0.110117	0.0774726	0.0120764	0.0812254	0.00555008	-0.0389068	-0.0532559	0.0110517	0.0124987	0.0462903	-0.010474	0.0128178	-0.052522
72	48.24	0	-0.0688977	-0.0550671	-0.0387982	0.042704	0.296021	-0.00228297	-0.0611721	-0.06598	0.026503	0.0340925	0.0360848	0.0934954	0.0338105	0.0478455	0.0539779	-0.0478167	-0.019008	-0.0479244	0.0227197	-0.0313601	0.0367519	-0.0488785	-0.0279745	-0.0136442
73	48.91	0	-0.138972	-0.0541633	-0.0462773	0.0283382	0.342224	0.117797	-0.0222436	-0.0409794	-0.0380901	0.041082	0.0310421	0.0543199	0.0728598	-0.0417188	0.0612965	-0.0598868	-0.0322226	-0.0292701	-0.0353996	0.00362984	0.0360041	0.0578793	0.0115204	0.070743
74	49.58	0	-0.0982589	-0.0766826	0.0119797	0.0229199	0.339835	0.0239874	0.00790508	-0.0524111	0.0246421	-0.0367634	0.0158154	0.0581237	0.0233834	0.0598554	-0.000654547	-0.0191411	0.0386108	-0.0340763	0.0369964	-0.0391739	0.00420074	0.0424913	-0.105327	-0.0257864
75	50.25	0	-0.0495628	-0.0367335	-0.0580334	0.0696905	0.217467	0.082588	-0.0703048	-0.0948456	0.00203393	0.0197878	0.0977442	-0.014529	0.0326549	0.0249579	0.0549453	-0.0882666	-0.0706655	-0.0071922	0.0220851	0.0126252	0.0245864	-0.0926906	0.0429796	-0.143072
76	50.92	0	-0.0547526	-0.0578834	-0.0137825	0.0890997	0.193407	0.0818098	-0.00244527	-0.0112847	0.0850565	-0.00545783	-0.0494319	0.0184668	0.0281177	0.00851688	0.00149621	-0.0407804	-0.0606889	-0.0799616	0.0015231	0.0118472	0.0772712	-0.0135332	0.0646517	-0.0274563
77	51.59	0	-0.0688343	-0.10209	0.00461333	0.0142623	0.0791933	0.0588962	0.011274	-0.0352052	0.000281045	0.0217476	0.0203454	0.0762476	-0.0522065	0.0127088	0.0108923	0.00932239	-0.0183228	0.020909	0.0425115	0.111457	-0.0228603	-0.0176119	0.0605348	-0.117763
78	52.26	0	-0.0949966	-0.0618418	-0.0232915	0.0635415	0.110455	-0.0375969	-0.00293753	0.0495607	-0.0117025	0.0318908	0.0641728	0.0467803	0.0146933	0.0185434	0.0813798	-0.0077867	-0.0064055	0.051023	0.00464911	-0.0335952	-0.0480134	0.0479587	0.0725338	-0.0238942
79	52.93	0	-0.105834	-0.0433206	0.0055795	0.0872566	0.111789	0.0933447	-0.0240554	-0.0352017	-0.0153736	0.0187635	0.0232635	0.096688	0.0456803	0.00101315	0.0207193	0.00956672	-0.0159199	-0.0112542	0.0304638	-0.0173305	0.064738	0.0153298	0.0509601	-0.0268603
