# Supplementary material for: Taste quality and hunger interactions in a feeding sensorimotor circuit
Source: eLife. 2022 Jul 6;11:e79887. doi: 10.7554/eLife.79887 (PMC9292995; doi:10.7554/eLife.79887)
Supplement: Figure 3—source data 1. [file elife-79887-fig3-data1.xlsx]

## Sheet: 20201019_SS67405_Zorro
Responses of Zorro (SS67405) to taste detection in food-deprived animals
Frame	Time (seconds)	Taste stimulus	20201019_Fly1_water	20201019_Fly1_sugar	20201019_Fly1_bitter	20201020_Fly2_water	20201020_Fly2_sugar	20201020_Fly2_bitter	20201020_Fly3_water	20201020_Fly3_sugar	20201020_Fly3_bitter	20201020_Fly4_water	20201020_Fly4_sugar	20201020_Fly4_bitter	20201020_Fly5_water	20201020_Fly5_sugar	20201020_Fly5_bitter	20201027_Fly6_water	20201027_Fly6_sugar	20201027_Fly6_bitter
0	0	0	0.393444	-0.0691951	-0.00340231	0.101323	0.277864	0.0255568	0.00682878	0.238841	0.0370347	0.0574579	-0.0136554	0.00670826	-0.00289717	0.0346565	0.00357909	-0.0886923	0.00250109	-0.0269983
1	1.2	0	0.231491	-0.126776	-0.0209591	-0.0442008	-0.0331762	0.0299654	-0.0855148	0.142336	0.0289282	0.0188564	-0.0166766	-0.00899432	0.0148852	0.00689701	0.00105989	-0.137371	-0.0452718	-0.0493834
2	2.4	0	0.202419	-0.100113	-0.0043468	-0.03365	-0.0459143	-0.0473541	-0.0965777	-0.0167039	-0.00948997	-0.0143175	-0.013598	-0.00173961	-0.00416156	0.0175353	0.0064582	-0.122397	-0.0465369	-0.0321309
3	3.6	0	0.172492	-0.0953687	0.0157415	-0.0264983	-0.0490521	-0.00301476	-0.129885	-0.00312523	0.0803851	-0.0452765	-0.0408798	-0.0201949	-0.0299709	-0.00279105	0.00892955	-0.099575	-0.0344219	-0.0136759
4	4.8	0	0.137533	-0.0998961	0.0141029	-0.0393583	-0.0634963	-0.00354452	-0.116252	0.0731647	0.134239	0.00171149	-0.0289634	0.00789239	-0.0340376	-0.0119177	0.00256453	-0.104177	-0.025669	-0.00735875
5	6	0	0.132992	-0.0868686	0.0232846	-0.0340113	-0.0584336	0.00618314	-0.0974787	-0.0726828	0.0980628	-0.052006	-0.0453687	0.0106383	-0.0208061	0.00347914	0.00507547	-0.0626287	-0.0110695	-0.0122563
6	7.2	0	0.105753	-0.0769557	-0.0026418	-0.0243629	-0.0525575	-0.0227049	-0.0822654	-0.00929765	0.0988042	-0.0180204	-0.0457815	-0.00304531	-0.027599	0.011188	0.00964927	-0.0542164	-0.00722505	0.00108215
7	8.4	0	0.0594434	-0.053839	-0.00095184	0.0414673	-0.0814247	-0.0355743	-0.0826789	-0.0254805	0.151003	-0.0519214	-0.0208892	-0.00795039	-0.0352755	0.0398744	-0.000255179	-0.0295719	-0.0125108	-0.00598244
8	9.6	0	0.0472688	-0.0791371	-0.0153076	-0.0239391	0.034751	-0.0351416	-0.0968436	-0.0145101	0.0557231	-0.0563007	-0.0166221	-0.0116832	-0.0111372	0.0280487	-0.00719808	-0.0343271	-0.00804964	0.00517206
9	10.8	0	0.0365852	0.0776877	0.0630514	-0.0144188	-0.0264559	-0.0280667	-0.0162276	0.0339231	0.0371128	-0.0377861	-0.0217937	0.0117344	-0.00599349	0.0143146	-0.0030983	-0.0104671	-0.00249288	0.0121891
10	12	0	0.0248356	0.0229599	0.0293052	-0.0193359	0.0219908	-0.011554	0.0623649	0.0145554	0.0270496	-0.00265084	-0.0106234	0.0312021	-0.020595	0.0061245	-0.00903174	0.0231698	-0.00935823	0.00121723
11	13.2	0	0.0287703	0.0627111	0.0172033	-0.0352307	-0.0631918	0.0210699	0.0144355	0.00473418	-0.0136346	-0.00637065	-0.0212862	0.0257005	-0.00959016	-0.00161768	-0.00503121	-0.0067213	-0.0100337	0.00565694
12	14.4	0	0.0233033	-0.00657047	-0.0113786	0.0295844	-0.0476595	0.0167249	0.0170793	-0.0588271	0.149707	-0.00413876	-0.00696038	-0.000826305	-0.00435802	0.000922224	-0.00767862	-0.00977365	-0.00778024	0.00806235
13	15.6	0	-0.0235122	-0.0399803	-0.0302353	0.00365867	0.00763399	0.0125248	-0.0125202	-0.0517303	0.155126	0.0655232	0.0627308	0.00105077	0.00615928	-0.0132846	-0.00340862	-0.0336507	0.00271296	0.00909385
14	16.8	0	-0.0478665	-0.0280224	-0.0352211	0.0173646	0.0497052	0.0334631	-0.0229924	0.00362365	-0.0697648	0.00122115	0.029992	-0.0349414	0.00877625	-0.000538234	0.00844011	0.0107159	0.00276369	-0.0166465
15	18	0	-0.0211148	-0.00722337	-0.0424633	0.020564	0.0332929	0.0342383	-0.0245432	0.086443	-0.0693303	-0.00916051	-0.0236685	-0.0172361	0.0269493	0.00425348	0.00901074	0.00141525	0.00685886	-0.0120516
16	19.2	0	-0.00397072	-0.0429536	-0.00979068	0.0021512	0.0327256	-0.0557072	0.0040372	-0.0412017	-0.116308	-0.0125591	-0.00758326	-0.00638288	0.00501362	-0.00587507	0.0092283	-0.000303048	0.0116209	-0.00749345
17	20.4	0	-0.0170302	-0.0386086	0.0195293	-0.00433747	-0.00804133	-0.0226929	-0.0216335	0.0084799	-0.0999573	0.00592164	-0.00080729	-0.010301	-0.00636178	-0.00429922	0.00156934	0.0256149	0.00570865	-2.79657e-05
18	21.6	0	0.0119014	-0.0575205	0.0234481	-0.00883701	0.00923138	-0.00837796	-0.0457681	-0.0235371	-0.0918193	-0.015146	-0.000236538	0.00476048	-0.0241575	0.00163396	0.00309042	0.0142698	0.00341184	-0.0085588
19	22.8	0	-0.0134202	-0.0339829	0.0330843	0.295352	0.26591	0.00828151	-0.0363299	-0.111307	-0.16826	0.0302357	0.133937	0.0832219	-0.00808195	0.142377	-0.00433924	-0.00273166	0.0588506	0.00195098
20	24	1	-0.0281487	0.208827	0.035967	0.28884	0.347831	0.0145531	-0.0361526	0.683313	0.041226	0.0117381	0.243529	0.114179	-0.00920942	0.151106	0.0125902	0.0243723	0.399501	0.0221686
21	25.2	1	-0.0265258	0.27008	0.0182321	0.114254	0.222211	0.022759	0.00892615	0.775134	-0.12581	-0.0081122	0.160569	0.0460651	-0.000869277	0.155409	0.0105945	0.0522621	0.377934	0.0158146
22	26.4	1	-0.0258618	0.13623	0.0254705	0.062107	0.122424	0.0126505	-0.00105853	0.89421	-0.114718	-0.00943104	0.060158	0.0314931	-0.0240709	0.203911	0.00771193	0.0535369	0.352071	0.00987803
23	27.6	1	-0.0350294	0.0609817	0.035389	0.107621	0.0427061	-0.0203921	-0.010349	0.658268	-0.174581	-0.0286219	0.0505836	0.0358756	-0.0046226	0.186053	-0.010649	0.0583751	0.290305	-0.00315599
24	28.8	1	-0.0224939	0.0759687	0.0485513	0.011731	0.0841449	-0.0148378	-0.00921171	0.424518	-0.151079	-0.00828128	0.0146887	0.0412141	0.0171905	0.180195	-0.0121999	0.046928	0.223925	-0.00785586
25	30	1	-0.0240361	0.291362	0.0552035	0.132728	0.0643764	0.0168041	-0.13532	0.327158	-0.146033	-0.0150108	-0.00363234	0.0486563	0.020238	0.142116	0.00164185	0.0638069	0.182788	-0.00642225
26	31.2	0	-0.0268438	0.270737	0.0195448	0.150661	0.233195	0.050806	-0.191491	0.346162	-0.124706	-0.0095494	0.00690626	0.0229706	0.00379243	0.0981765	-0.000156818	0.0589138	0.111961	-0.00170431
27	32.4	0	-0.0919188	0.143998	0.0148493	0.0902581	0.157048	0.0457522	-0.155688	0.327858	-0.122025	-0.0513973	0.00717951	0.0125382	0.0119749	0.0688122	-0.0172677	0.0548465	0.065169	-0.0106985
28	33.6	0	-0.0663798	0.0765286	0.0220284	0.305366	0.158164	0.0368181	-0.110447	0.463252	-0.114896	-0.0474069	-0.00103195	0.0182984	0.0185119	0.0352422	-0.00622422	0.0633181	0.0584354	-0.0132931
29	34.8	0	-0.0953592	0.0527062	0.0318965	0.247347	0.249781	0.034858	-0.137477	0.207197	-0.0894755	-0.0137257	0.0566114	0.0169317	0.0281832	0.0252986	-0.00919846	0.0845945	0.038072	-0.0255345
30	36	0	-0.0738932	0.0278606	0.0206184	0.167325	0.218702	0.0413685	-0.155984	0.23658	-0.141188	-0.00973539	0.0741699	0.0251542	-0.0152985	0.0394006	0.00698393	0.0762852	0.0263389	-0.02277
31	37.2	0	-0.116468	0.0094691	0.0274081	0.0890387	0.158885	0.0380336	-0.164875	0.251024	-0.153356	-0.0136581	0.0123376	0.00769316	-0.0112003	0.0227675	-0.00815432	0.0805574	0.0195237	-0.0281869
32	38.4	0	-0.141051	0.0514051	0.0228435	0.0522101	0.113451	0.0568102	-0.138171	0.211817	-0.131569	-0.0226702	-0.0232742	-0.0035979	-0.00797743	0.0328256	-0.0113642	0.0933623	0.0122024	-0.0256727
33	39.6	0	-0.124928	0.0860359	0.0219293	0.204387	0.09679	0.0638444	-0.13244	0.0370257	-0.137907	-0.0143682	-0.0105869	0.0158437	0.0293495	0.0165066	-0.00287034	0.100443	0.010162	-0.0296616
34	40.8	0	-0.12446	0.150191	0.0147196	0.168083	0.172436	0.0871555	-0.149677	0.165484	-0.182427	-0.0296026	-0.0171378	0.0343817	0.0259182	0.0211844	-0.0133755	0.0875653	0.00865507	-0.0336804
35	42	0	-0.14601	0.209148	0.00473654	0.0942074	0.153914	0.0610908	-0.143591	0.250686	-0.240879	-0.0285712	-0.010078	0.0386826	0.026006	0.0283728	-0.00346142	0.0798079	0.0129584	-0.0384952
36	43.2	0	-0.170714	0.172607	0.0121094	0.053928	0.0512947	0.0878633	-0.125454	0.11579	-0.30292	-0.0159238	-0.00748211	0.0283093	0.0574845	0.0289891	0.00164052	0.0951295	0.0127128	-0.0298023
37	44.4	0	-0.141054	0.13274	0.00662403	0.0403043	0.0295983	0.0624738	-0.135409	0.181641	-0.298793	-0.0023634	-0.0120196	0.0175649	0.0510249	0.0204532	-0.01163	0.118374	0.0397406	-0.0418468
38	45.6	0	-0.0508982	0.165534	0.0280674	0.0871852	0.0795428	0.0910541	-0.139869	0.181537	-0.442613	-0.0133707	-0.019657	0.0330129	0.0702485	0.0345356	-0.00699169	0.123878	0.0393914	-0.0305467
39	46.8	0	-0.0737383	0.196292	0.0283686	0.0383686	0.0874985	0.0759353	-0.13182	0.144322	-0.300427	-0.0309214	-0.03686	0.0325499	0.0607848	0.0245856	-0.0194515	0.137427	0.030047	-0.032742
40	48	0	-0.0790257	0.147063	0.0163041	0.00737019	0.0277675	0.0903971	-0.162025	0.0621418	-0.271043	-0.0328489	-0.0291012	0.0398746	0.0637877	0.0187139	-0.0239548	0.125183	0.0222697	-0.00819029
41	49.2	0	-0.116685	0.117765	-0.00300072	0.00844934	0.0592148	0.0920514	-0.138732	0.119579	-0.25857	0.0207502	-0.0398976	0.0402301	0.0592144	0.0341702	-0.025734	0.140802	0.0191335	0.00639114
42	50.4	0	-0.120107	0.105302	0.00401826	-0.00619094	-0.0106025	0.0736188	-0.151774	0.136474	-0.248268	-0.0158731	-0.0387894	0.0516866	0.0478848	0.0194875	-0.0304452	0.12607	0.0258268	-0.00545461
43	51.6	0	-0.146032	0.0935173	0.0415219	-0.0411706	0.0186471	0.0877831	-0.163029	0.115677	-0.234227	-0.0104963	-0.0248183	0.0277883	0.057565	0.0243255	-0.0189366	0.129506	0.0159593	-0.0193568
44	52.8	0	-0.1416	0.0861654	0.0365123	-0.0215141	0.0406679	0.0979971	-0.160769	0.0779476	-0.260425	-0.0108344	-0.0133511	0.0586511	0.0726301	0.0118035	-0.0223665	0.123997	0.0203529	-0.0380395
45	54	0	-0.1229	0.0952926	0.0317463	-0.024907	-0.01897	0.0747198	-0.182186	0.0940857	-0.219163	-0.020117	-0.0255777	0.0652819	0.0727484	0.0138381	-0.0161355	0.139172	0.0296458	-0.0368813
46	55.2	0	-0.136126	0.0639382	0.0369297	-0.0227121	-0.00948018	0.130693	-0.154019	0.153245	-0.229438	-0.0371944	-0.0292216	0.0565911	0.0965451	-0.0102707	-0.0190154	0.135127	0.0229927	-0.0407956
47	56.4	0	-0.123205	0.056525	0.0105643	-0.031792	0.0312819	0.140792	-0.147535	0.114201	-0.26499	0.0019313	-0.0406277	0.0462487	0.0707085	-0.00246024	-0.0246779	0.123742	0.0155254	-0.0429773
48	57.6	0	-0.145397	0.0801721	0.017284	-0.0263916	-0.00426164	0.130688	-0.144891	0.110172	-0.309463	-0.0056605	-0.0414181	0.0451137	0.0473461	-0.000269991	-0.00809417	0.148234	0.0063503	-0.0496301
49	58.8	0	-0.0448529	0.108994	0.0164215	-0.0402424	-0.0280939	0.114036	-0.136797	0.193028	-0.27124	0.0197526	-0.0469221	0.0564397	0.0614523	-0.006887	-0.0104012	0.143251	0.0116725	-0.0525808
50	60	0	-0.0397517	0.0665529	0.0386792	-0.0368265	0.0534907	0.131288	-0.135261	0.15153	-0.247615	0.00575256	-0.0446527	0.0519233	0.043364	-0.00754976	-0.0103992	0.121423	0.00548964	-0.0478007
51	61.2	0	-0.0388801	0.078624	0.0513072	-0.0351148	0.0225265	0.123168	-0.148879	0.166152	-0.00582955	-0.00572813	-0.0456703	0.0362513	0.0718415	-0.00266823	-0.0136513	0.128384	0.0148359	-0.0527261
52	62.4	0	0.0213936	0.0946498	0.0383046	-0.0346408	-0.0126837	0.117015	-0.162512	0.106308	-0.188982	-0.00577886	-0.0476435	0.0636417	0.0735231	0.0211476	-0.0215424	0.15746	0.014508	-0.0534828
53	63.6	0	0.0488209	0.0634568	0.0183169	-0.00537699	-0.00089971	0.119985	-0.175776	0.0169016	-0.272272	-0.0123731	-0.0458283	0.0696799	0.0818414	0.0211227	-0.0171952	0.17807	0.00981698	-0.0561401
54	64.8	0	0.095633	0.0980767	0.0131693	-0.016289	-0.0183349	0.0811671	-0.155083	0.149783	-0.341264	0.00216801	-0.0338403	0.0477658	0.0917672	0.0340255	-0.0211489	0.178597	0.00281174	-0.0562856

## Sheet: 20201014_SS48947_Clavicle
Responses of Clavicle (SS48947) to taste detection in food-deprived animals
Frame	Time (seconds)	Taste stimulus	20201014_Fly1_water	20201014_Fly1_sugar	20201014_Fly1_bitter	20201014_Fly2_water	20201014_Fly2_sugar	20201014_Fly2_bitter	20201014_Fly3_water	20201014_Fly3_sugar	20201014_Fly3_bitter	20201019_Fly4_water	20201019_Fly4_sugar	20201019_Fly4_bitter	20201019_Fly5_water	20201019_Fly5_sugar	20201019_Fly5_bitter	20201027_Fly6_water	20201027_Fly6_sugar	20201027_Fly6_bitter	20201027_Fly7_water	20201027_Fly7_sugar	20201027_Fly7_bitter	20211118_Fly8_water	20211118_Fly8_sugar	20211118_Fly8_bitter	20211118_Fly9_water	20211118_Fly9_sugar	20211118_Fly9_bitter
0	0	0	0.209749	-0.0522053	0.15753	0.480047	-0.00888453	-0.150917	-0.142753	-0.0618653	-0.0994989	-0.145187	0.0173518	-0.120908	-0.306309	0.0475427	0.0114916	0.850234	-0.247507	-0.10705	0.0147997	0.0486315	0.049756	0.0992994	-0.0376763	0.0137475	-0.337714	-0.0277573	0.0215174
1	1.2	0	0.0521931	-0.0863937	0.0494871	0.151353	-0.00263508	-0.132541	0.0188609	-0.0806793	0.0146619	-0.137619	-0.0288309	-0.101707	-0.124656	-0.0365995	-0.00854919	0.486485	-0.154325	0.00469216	-0.0226979	0.0140818	0.00118068	0.0553539	-0.0476402	0.00413678	-0.261531	-0.00501507	0.00159399
2	2.4	0	0.0390064	-0.013384	0.062346	0.101677	-0.0313191	-0.105311	-0.00417398	-0.156675	-0.0256055	-0.120529	-0.0522628	-0.0847222	-0.0963492	-0.00401495	0.00605838	0.330078	-0.0999869	-0.00666885	-0.014463	-0.0381677	0.00811602	0.0529271	-0.0211533	-0.00450723	-0.198922	-0.0157887	0.00150503
3	3.6	0	0.0299055	-0.0790836	0.0171158	0.0478399	-0.00125938	-0.0844029	0.0305818	-0.213851	-0.0445554	-0.11704	-0.0238275	-0.0470523	-0.0646959	-0.015089	0.0134194	0.231765	-0.0528017	0.0359171	-0.015227	-0.0218793	0.0228281	0.0438722	-0.0159818	-0.00144982	-0.122948	0.0024942	0.0180608
4	4.8	0	-0.0109905	-0.210158	0.0264709	0.159053	-0.0267303	-0.082714	0.00545164	0.105603	-0.0521649	-0.0116152	-0.0424092	-0.0568507	-0.0664483	-0.0360224	0.0060665	0.150421	-0.0500594	0.0252072	-0.00330542	-0.0316052	0.00464376	0.0631579	-0.00934336	-0.00802163	-0.114909	0.00449228	0.0118098
5	6	0	-0.000238776	-0.14157	0.0193542	0.0887306	0.0128207	-0.0953558	0.0107389	-0.0298582	-0.0611104	-0.0585272	-0.0302084	0.00997408	-0.0919921	-0.0136814	0.0120621	0.152876	-0.0802366	0.00292716	-0.0182613	-0.0512021	-0.00576087	0.0256409	-0.00229085	-0.0079467	-0.108924	-0.0141208	0.0428717
6	7.2	0	0.0226628	-0.156099	0.032269	0.105417	0.0123458	-0.0545613	0.033133	0.110476	0.0249775	-0.0400865	-0.00690487	0.0240675	-0.10402	0.00200929	-0.00894131	0.119054	-0.0586426	0.0386229	-0.00271682	-0.0275272	0.0115624	0.02535	-0.000876283	0.0146208	-0.047872	-0.00302842	0.0130374
7	8.4	0	0.00721909	-0.0703806	0.0329925	0.0806892	0.023843	-0.0829911	0.0470723	-0.110283	-0.0437121	0.000941392	0.0101057	0.0298575	-0.129955	-0.0733036	-0.00415124	0.0560596	-0.0417176	-0.0134151	-0.00166749	-0.0180183	0.00790822	0.0352657	0.0242608	0.0121064	-0.0597937	-0.00230522	-0.000779839
8	9.6	0	0.016588	-0.00954086	0.00984049	0.030792	-0.000154473	-0.048842	0.0288563	-0.0327462	0.0140132	-0.126601	0.0205	0.0224192	0.00742176	-0.00106018	0.0057875	0.0706546	-0.0442123	0.00675234	-0.00799381	-0.017922	-0.0187894	0.0375098	0.00100271	0.0100721	-0.0460268	-0.0117054	0.00223065
9	10.8	0	0.00571141	0.0128267	0.0160192	-0.0117271	0.0135992	-0.0224161	-0.00926409	-0.128454	0.0417403	0.012304	-0.00375543	-0.0387587	-0.031291	-0.0157661	0.0122642	0.0478962	-0.0320479	0.0139782	-0.00944099	0.00135346	-0.00959031	0.0158576	0.00138006	0.00990562	-0.0311528	-0.0129703	0.00918821
10	12	0	0.0161387	0.0091225	0.0165457	0.00885899	0.0146402	-0.0200782	0.00135983	-0.198891	0.015036	-0.104377	-0.0417151	-0.0400565	0.0500574	-0.0212822	0.000546757	0.0637779	0.0150321	0.0258331	-0.0126934	0.00904836	0.00294454	0.0198032	0.00176127	-0.0026071	-0.0146904	0.0373764	0.00081881
11	13.2	0	0.0100282	0.00512684	0.0148373	0.0172824	-0.0148779	0.00738375	0.0292137	-0.266285	-0.0295874	-0.0320782	-0.000829419	-0.0323016	-0.0759921	-0.0126859	-0.0190363	0.0509947	-0.0301725	-0.0157453	0.00647081	0.0091226	-0.00437054	0.0256178	0.0219706	-0.00151735	-0.0256653	0.00357185	-0.00927758
12	14.4	0	0.0129163	0.0453952	-0.0160318	0.0565447	-0.00146203	-0.0115922	0.0251219	0.218854	-0.0295862	0.0118504	0.0154431	-0.0240808	-0.0418891	0.0185428	-0.0286002	0.0296391	0.0233412	-0.040583	-0.00331028	-0.00965028	-0.00687788	0.0235071	0.0121209	-0.00599569	0.00140307	-0.000877399	-0.0181858
13	15.6	0	-0.0158361	0.0926721	-0.0205259	0.0412861	0.0164061	-0.00502652	0.0072757	0.0424554	-0.0354415	-0.0174067	0.0226951	-0.0228098	0.0253069	0.00975503	0.00278252	0.00399184	-0.0277889	0.00910382	-0.000110137	0.00837857	0.0165555	-0.00730347	0.00941851	0.0138252	0.00918504	-0.00818371	-0.00218406
14	16.8	0	-0.0210026	-0.0929346	0.0225798	-0.00507281	-0.0184777	-0.00942514	0.00320854	0.0900365	0.0144391	-0.0226868	0.0187542	0.0450798	0.0364512	0.0161189	0.0287931	0.00193568	0.0327819	0.0258815	-0.00167088	0.0315678	0.0165731	-0.00523184	-0.0173876	0.0238855	0.0153464	-0.00499506	0.0153197
15	18	0	-0.00648269	-0.0288244	-0.00493231	0.0258867	0.0139749	-0.0274751	-0.0159811	-0.0563155	0.0202146	0.0511685	0.00674231	0.0370012	0.0320045	-0.0100521	0.0307446	-0.0309159	-0.00374542	0.0146738	0.00528858	0.00646135	-0.00818765	-0.0229926	0.00112559	2.29216e-05	0.0142393	-0.0154229	-0.000662927
16	19.2	0	0.00798512	-0.0902369	-0.0169143	-0.0322529	-0.00444677	0.0107425	-0.0317074	0.236865	7.84337e-05	0.0710546	-0.00794478	0.0308321	0.0258839	0.0334356	-0.0188521	-0.0702044	-0.00135321	-0.0223568	-0.0019302	-0.0208921	-0.0038123	-0.0205679	-0.014275	-0.0179876	-0.00730952	0.00687341	0.00151266
17	20.4	0	-0.00945839	0.0468525	-0.0115778	-0.100806	-0.019356	0.077887	-0.00922712	0.0617338	0.00310672	0.0301714	-0.00938996	0.0450942	-0.0205316	-0.018066	-0.00864243	-0.0971151	0.0239527	-0.0107852	0.0173965	-0.0353898	-0.00323446	-0.0286899	-0.0161143	-0.0195316	0.0386442	-0.00537238	0.00347094
18	21.6	0	0.00322026	-0.0272892	-0.0125058	-0.132449	0.00377245	0.108009	-0.0253848	0.346953	0.0083156	0.0890889	-0.0133773	0.0244732	0.00518821	-0.0569183	0.0267152	-0.1082	0.0460202	-0.0312705	-0.0027756	-0.0501886	0.0139165	-0.018714	-0.00700671	-5.57108e-05	0.027589	0.00470238	0.000449011
19	22.8	0	-0.0312862	0.0900693	-0.0293248	-0.127162	0.0159423	0.0749229	0.0208699	0.234522	0.02433	0.0752236	0.0944252	0.0168147	-0.0145118	-0.0252165	0.0575266	-0.0984937	0.593005	0.0392239	0.0932859	0.462931	0.0375349	-0.0306682	-0.0104164	0.00344482	0.0337343	0.181323	-0.00724941
20	24	1	-0.0136757	0.359263	-0.00647857	0.0478198	0.259039	0.063822	0.20404	0.134842	-0.0395849	0.244257	0.143537	0.0810172	0.117183	0.400737	0.0448008	-0.0745149	1.39763	0.0673356	0.07292	0.341472	0.000207451	-0.0183378	0.253449	-0.00461269	0.0665309	0.348325	0.000790852
21	25.2	1	-0.014532	0.327948	-0.0408553	0.125962	0.152847	0.0209971	0.0300395	1.03414	-0.0100475	0.27392	0.0978075	0.0368348	0.117521	0.226272	0.0379804	-0.0949906	1.12191	0.121733	0.0795903	0.193145	0.0267856	-0.0406932	0.137336	0.0022496	0.123026	0.15086	0.0112456
22	26.4	1	-0.0212133	0.291171	-0.0187807	0.126365	0.0674864	-0.0216798	-0.0445375	1.53651	0.0412101	0.200612	0.075084	0.0500475	0.0669305	0.0866516	0.0906576	-0.0738829	1.23243	0.156646	0.0967202	0.127095	0.0234269	-0.0194052	0.0842328	0.0282381	0.0678306	0.086411	-0.0208951
23	27.6	1	-0.0342545	0.341464	-0.0547881	0.077352	0.0236675	0.0651845	-0.12296	1.20454	-0.0140233	0.163013	0.0330051	0.0212914	0.0137361	0.165731	0.0434048	-0.0385206	1.02713	0.136711	0.0823895	0.115103	0.0190859	-0.0376786	0.062665	0.00997222	0.0603375	0.0436465	-0.0326677
24	28.8	1	-0.0389341	0.34773	-0.0491088	0.132778	0.00803814	0.100104	-0.0728227	0.641894	0.109824	0.0525221	0.0399137	-0.0380789	0.00315256	0.157845	0.0374347	-0.108149	0.69503	0.136349	0.0708402	0.0711899	0.0245739	-0.0430076	0.0266236	0.00633571	0.104061	0.0117586	-0.024189
25	30	1	-0.0380555	0.292035	-0.0611471	0.116514	0.013237	0.036842	-0.0754479	0.53363	0.0688154	0.162438	0.00710361	-0.00770296	0.0956123	0.304944	0.0137469	-0.143848	0.581184	0.142063	0.0740774	0.113003	0.0176933	-0.0578842	0.029383	-0.0012463	0.0609311	-0.0203638	-0.00183078
26	31.2	0	-0.00996299	0.109299	-0.0551441	-0.0533818	0.0203803	0.0780388	-0.0661427	0.416585	0.0576103	0.115048	0.0169429	0.0156177	0.0564013	0.111879	0.0338857	-0.18469	0.376121	0.0731941	0.0380517	0.0492139	0.00842536	-0.0699177	0.0263952	-0.0184631	0.0494908	-0.0208526	-0.0108673
27	32.4	0	-0.0190877	0.0277994	-0.0514913	-0.0795768	0.0528064	0.101865	-0.0548779	0.124783	0.0431115	0.109769	0.0170475	0.0684176	-0.0165611	0.155496	0.0217355	-0.190028	0.286716	0.0701927	0.0474418	0.0391784	0.0139966	-0.067186	0.038898	-0.00651744	0.0326914	0.0040535	-0.0212992
28	33.6	0	-0.0139345	0.125519	-0.0617641	-0.0173159	0.0519509	0.565713	-0.0615703	0.267645	0.0262862	0.114684	0.0422823	0.0370684	-0.0331978	0.122825	0.010135	-0.170014	0.330809	0.0972785	0.0212062	0.0145032	-0.00233767	-0.0810142	0.0162291	-0.0229868	0.0700449	-0.00197649	-0.00196167
29	34.8	0	0.00102269	0.0362449	-0.0206369	-0.00406763	0.0459862	0.260011	-0.0969792	0.179269	0.0166313	0.0479124	0.00224753	0.039769	-0.0330988	0.122107	-0.000199939	-0.148652	0.247499	0.15678	0.00124998	-0.00895939	0.0149376	-0.0536085	0.0176272	-0.0234317	0.0730453	-0.00634999	-0.0116692
30	36	0	-0.00865674	0.119191	-0.025475	-0.0182809	0.066711	0.124739	-0.102612	0.386085	-0.0156579	0.084319	-0.00864004	0.00650525	-0.0858406	0.00398072	-0.00323772	-0.153517	0.275288	0.128737	-0.0108419	-0.00131256	-0.0105384	-0.06752	0.0164565	-0.0402516	0.0642846	-0.00466205	0.00285969
31	37.2	0	-0.00363871	0.0685456	-0.0418401	0.0173829	0.112136	0.137976	-0.0981008	0.104997	0.0374302	0.0462733	0.00708816	-0.00389377	-0.101061	0.0718164	0.00877195	-0.174784	0.254297	0.143832	-0.0113525	0.00549012	-0.0284171	-0.0754795	0.0169558	-0.0247056	0.0699325	-0.00792645	-0.00259198
32	38.4	0	0.0168595	0.121577	-0.0461829	0.00351143	0.0928838	0.100286	-0.0899541	0.285768	0.00443109	0.0625729	0.00616947	0.033318	-0.0380935	-0.0118969	0.00467262	-0.217549	0.228106	0.0714864	0.0154118	0.0327146	-0.0608387	-0.0886195	0.00589273	-0.0309397	0.0550425	-0.00919419	0.0164215
33	39.6	0	0.00286278	0.156552	-0.0629011	-0.0641171	-0.00173746	0.13576	-0.0656497	0.164155	0.0633829	0.0142355	0.0386444	0.0368246	0.00491871	0.0795415	0.00407963	-0.229663	0.186989	0.0766826	-0.0100324	0.0495682	-0.0806033	-0.0947531	0.0246952	-0.0359315	0.0639637	-0.0394113	-0.0263913
34	40.8	0	-0.0159163	0.238346	-0.056946	-0.0647403	0.0425148	0.198954	-0.0620879	0.226277	0.0385019	0.0712604	0.0497245	0.0266922	-0.0343548	0.0323346	0.00870697	-0.262014	0.130502	0.0211424	0.000556825	0.0628238	-0.0854603	-0.116617	0.0315852	-0.0295706	0.0577702	-0.0484099	-0.020965
35	42	0	-0.0415863	0.222173	-0.0282725	-0.0979514	0.0648228	0.165632	-0.0650335	0.218921	0.0375768	0.105402	0.033074	0.0803802	-0.026191	0.0478214	0.0241882	-0.261359	0.171513	0.0245956	0.031465	0.0697777	-0.0804017	-0.102113	0.0338744	-0.0441527	0.053438	-0.0254161	-0.00672839
36	43.2	0	-0.0482245	0.304276	-0.0630383	-0.0903121	0.0646301	0.141711	-0.0608061	0.259235	-0.0138891	0.0948711	0.00889701	0.0939314	-0.0392054	0.106957	-0.00134973	-0.26091	0.248275	0.0325403	0.0283108	0.0720203	-0.0988135	-0.115905	0.054644	-0.0469807	0.0301723	-0.00791358	-0.0151067
37	44.4	0	-0.0425959	0.274937	-0.067383	-0.0844418	0.0357089	0.14532	-0.0859979	0.209085	0.0340309	0.101045	0.0165163	0.0456396	-0.022383	0.114192	0.00765463	-0.26697	0.282888	0.00404326	0.0142633	0.0666033	-0.116118	-0.123145	0.0663978	-0.0427595	0.0299156	-0.0198635	0.00214932
38	45.6	0	-0.0701685	0.273416	-0.0722257	-0.0921616	0.0499696	0.105019	-0.0641954	0.286553	-0.0150891	0.0611791	0.0170404	0.137343	0.034882	0.106665	-0.00713908	-0.274728	0.256436	0.0240289	0.00648067	0.0441862	-0.123263	-0.101497	0.045368	-0.0293356	0.0545772	-0.0187373	0.0187382
39	46.8	0	-0.0531423	0.240498	-0.061101	-0.0882012	0.046037	0.145445	-0.0818444	0.200346	-0.0105992	0.0518718	-0.000862696	0.130895	0.0483958	0.0759435	0.0112137	-0.297404	0.230974	-0.0302251	0.0223506	0.0299491	-0.139439	-0.106826	0.0424267	-0.0408215	0.0443724	-0.0373861	0.011346
40	48	0	-0.0504003	0.238339	-0.0481077	-0.0430083	0.0485308	0.172623	-0.0756081	0.399505	0.00773115	0.0693991	0.0082386	0.0717117	0.039615	0.083342	0.00720764	-0.293673	0.249425	0.0441236	0.0156077	0.0426902	-0.145693	-0.123725	0.04701	-0.042482	0.059808	-0.0220631	-0.0152732
41	49.2	0	-0.0807895	0.171175	-0.0145755	-0.0645795	0.0500247	0.215068	-0.0770871	0.235513	0.0202486	0.106951	-0.00181466	0.0958744	0.0375374	0.0795994	-0.0291589	-0.307378	0.283963	0.0810407	0.00596094	0.0285117	-0.140233	-0.126425	0.0215584	-0.0477846	0.0947065	-0.00570254	-0.00737268
42	50.4	0	-0.066449	0.0740223	-0.0685557	-0.0888646	0.0345784	0.258121	-0.0752014	0.258708	-0.0159569	0.185405	0.00853809	0.086921	0.0641717	0.0567891	0.0127455	-0.343021	0.271865	0.0747934	0.0137281	0.068301	-0.116057	-0.116965	0.0124808	-0.0203382	0.0759656	0.00935887	0.00810804
43	51.6	0	-0.0503859	0.204937	-0.0767759	-0.0850248	0.0147581	0.191363	-0.0687925	0.262029	-0.0411527	0.102442	0.0307636	0.0816811	0.0986128	0.0554726	0.00587262	-0.33069	0.214274	0.0519768	0.0201459	0.0647675	-0.125413	-0.145647	0.0192489	-0.0465829	0.0700769	-0.00988023	0.0133043
44	52.8	0	-0.00471057	0.0997077	-0.0504911	-0.0776267	0.0141029	0.218973	-0.076286	0.234467	0.0519345	0.130971	0.0379087	0.0594486	0.073564	0.0590703	-0.0100584	-0.320289	0.232057	0.0510235	0.0309876	0.0703542	-0.11604	-0.15097	0.0190437	-0.0337834	0.0473728	-0.0369373	-0.00374839
45	54	0	-0.000321678	0.131321	-0.0849495	-0.0806623	0.0156241	0.199215	-0.0756697	0.548816	0.0122006	0.126559	0.0357897	0.0305674	0.0907237	0.138651	-0.014988	-0.307102	0.295996	0.0632399	0.0312552	0.0883763	-0.0854091	-0.159748	-0.0125373	-0.0341516	0.0567273	-0.0279388	-0.0371879
46	55.2	0	-0.0060095	0.204879	-0.0822506	-0.0461244	0.0187631	0.233653	-0.106568	0.462083	0.000360136	0.0765021	0.0259396	0.0485682	-0.00376293	0.150453	0.0218664	-0.303078	0.174581	0.0704935	0.0301005	0.0810406	-0.0574424	-0.140304	0.0179417	-0.033727	0.0393181	-0.0177468	-0.0106284
47	56.4	0	0.0334736	0.191296	-0.0759762	-0.0180999	0.0494228	0.174585	-0.106001	0.479126	0.0230282	0.0578809	0.0284794	0.0922291	0.0659869	0.141596	0.00636891	-0.310531	0.242581	0.0218689	-0.00137927	0.0740987	-0.0689513	-0.152213	0.00326292	-0.0407521	0.0302204	-0.0230064	-0.01546
48	57.6	0	0.00217201	0.0788246	-0.106398	-0.0504064	0.0545886	0.174205	-0.140954	0.540047	0.0522226	0.104136	0.0242354	0.102523	0.121004	0.0873212	-0.015901	-0.337421	0.218083	0.0458388	-0.00870314	0.0880624	-0.0677221	-0.143642	0.00709734	-0.0244558	0.0302525	-0.0330641	0.0170925
49	58.8	0	0.0169751	0.116571	-0.0732312	-0.0596541	0.0546731	0.159723	-0.120865	0.487926	0.0205151	0.134493	0.0276142	0.0474104	0.152108	0.145877	0.0091531	-0.350091	0.295618	0.0777042	-0.0242491	0.0863835	-0.0598351	-0.146971	0.00935852	-0.0407604	0.0505498	-0.026268	0.00659961
50	60	0	-0.00133064	0.0226481	-0.0981541	-0.0396711	0.0223301	0.166159	-0.135519	0.528655	0.014055	0.13358	0.0121296	0.0559813	0.142431	0.147564	0.00937618	-0.353416	0.30044	0.0516403	-0.0266654	0.0827977	-0.0775985	-0.139804	-0.00114526	-0.0328408	0.0556041	-0.00576971	-0.00733836
51	61.2	0	-0.0028717	0.107533	-0.110066	-0.0488383	0.0373201	0.211246	-0.135925	0.871924	0.0297573	0.174943	0.0147003	0.0584075	0.0690767	0.0669991	0.020741	-0.271811	0.32902	0.0455812	-0.00727353	0.0871327	-0.0448002	-0.13597	-0.00562988	-0.0355716	0.0324347	0.0146256	0.0035294
52	62.4	0	-0.0179203	0.151482	-0.0732048	-0.078652	0.0413264	0.202988	-0.138415	0.650529	0.000710693	0.083307	-0.00327766	0.00475786	0.0336975	0.114249	0.00490292	-0.292753	0.306314	0.0175509	0.0150477	0.072471	-0.0703228	-0.15035	-0.0137496	-0.0266381	0.0434418	-0.00365443	-0.0105903
53	63.6	0	-0.0372603	0.0472965	-0.117092	-0.111662	0.0499854	0.206195	-0.119299	0.760331	0.00546391	0.101097	-0.0253487	0.0491417	0.0987928	0.0842334	0.0635498	-0.286731	0.290547	0.0364237	0.014145	0.0677915	-0.0813602	-0.168479	-0.00875605	-0.032727	0.031488	-0.0330126	-0.0116146
54	64.8	0	-0.0384447	0.108784	-0.107057	-0.105752	0.027694	0.199963	-0.117204	0.680278	-0.0103511	0.118138	-0.0286016	0.0727384	0.0807167	0.135971	0.0156113	-0.289321	0.283409	0.0684446	-0.0133567	0.0728692	-0.0733483	-0.163834	0.00696382	-0.0481815	0.0744734	-0.00113323	-0.00596083

## Sheet: 20200804_SS47082_G2N-1
Responses of G2N-1 (SS47082) to taste detection in food-deprived animals
Frame	Time (seconds)	Taste stimulus	20200804_Fly1_water	20200804_Fly1_sugar	20200804_Fly1_bitter	20200804_Fly2_water	20200804_Fly2_sugar	20200804_Fly2_bitter	20200804_Fly3_water	20200804_Fly3_sugar	20200804_Fly3_bitter	20200804_Fly4_water	20200804_Fly4_sugar	20200804_Fly4_bitter	20201104_Fly5_water	20201104_Fly5_sugar	20201104_Fly5_bitter	20201111_Fly6_water	20201111_Fly6_sugar	20201111_Fly6_bitter
0	0	0	-0.0211612	-0.194903	0.0149845	2.31342	-0.613548	0.0240635	1.75955	-0.053822	-0.0836877	0.0395913	-0.213543	-0.473488	0.071926	-0.152756	0.0202921	0.133049	0.0152773	0.0666871
1	1.2	0	-0.165485	-0.0732051	0.0135526	1.51109	-0.554722	-0.0136565	1.12065	-0.0305825	-0.058122	-0.00897077	0.00389233	-0.198615	-0.00626109	-0.0537795	0.0187326	0.10209	0.0350415	0.0625056
2	2.4	0	-0.16712	-0.315656	-0.00328853	1.27187	-0.493637	-0.0212688	1.10964	-0.0107839	-0.0994372	-0.00953383	0.222245	0.07287	0.029661	-0.100178	0.0371158	0.0170682	0.0283334	0.00903154
3	3.6	0	-0.191954	-0.329693	0.0017914	1.00725	-0.349978	0.0247397	0.79378	0.01316	-0.074742	-0.0335187	0.0314907	-0.0867993	0.0314033	-0.000728744	0.0600393	0.014309	0.0365883	0.0563337
4	4.8	0	-0.131472	-0.237489	-0.00198353	0.838567	-0.353833	-0.00743875	0.66566	0.0117513	-0.0637075	-0.00366192	0.0641758	0.0321225	0.0396178	0.019637	0.0335571	0.0147669	0.0324707	0.0240277
5	6	0	-0.101714	-0.410346	0.0173356	0.686234	-0.338028	0.000604841	0.551175	-0.00875549	-0.0571017	0.0076724	0.033848	0.0493092	-0.00613552	0.0254398	0.0208765	0.0744403	0.0512928	0.0069283
6	7.2	0	-0.113007	-0.42561	0.011821	0.53071	-0.282971	0.0208757	0.426825	-0.0121913	-0.0640465	0.036659	0.161943	0.11845	0.0374044	-0.00268612	0.038998	0.010817	0.116388	0.00631838
7	8.4	0	-0.0912856	-0.488246	0.00881003	0.363232	-0.159165	-0.000441424	0.199813	-0.0108942	-0.021865	0.0107363	-0.131246	-0.0174562	0.00149918	-0.066927	0.0376488	0.00558467	0.071887	0.0462679
8	9.6	0	-0.0811393	-0.122891	0.0025212	0.375301	-0.239571	-0.0136075	0.388986	-0.0228321	-0.0348585	0.0475327	-0.224446	0.0800816	-0.000341918	-0.178949	0.0196999	0.0359136	0.0208703	0.0327011
9	10.8	0	-0.0869188	-0.170343	-0.00926679	0.31885	-0.117905	-0.00108224	0.18369	0.00877359	0.00704953	0.0160232	0.0939338	0.136304	-0.0200742	-0.118126	0.00127298	0.00543583	0.0233141	0.0209238
10	12	0	-0.0225917	-0.351231	0.00866893	0.138366	-0.019328	-0.0157898	0.318286	-0.0110443	0.000663647	-0.0111353	-0.0235079	0.0514187	0.00768821	0.00301736	-0.00813981	-0.000609353	-0.00262134	0.0300878
11	13.2	0	0.00343533	-0.0500146	0.015624	0.129818	-0.0584876	0.00795999	0.215771	-0.0190551	-0.0315419	0.0177563	0.00849359	0.0406678	0.0244847	0.00758858	-0.0133188	0.0118474	0.00795394	-0.00597761
12	14.4	0	-0.000380091	-0.0322645	0.00224049	0.0607848	0.0464897	-0.0192361	-0.0117497	0.00448594	-0.0025592	-0.0219504	-0.141734	-0.171135	0.0211516	0.0518583	-0.0140381	0.00165759	-0.00542533	-0.0394318
13	15.6	0	0.0183435	-0.0673703	0.00906345	-0.0589696	0.0186885	-0.00430947	-0.141914	0.00947409	-0.00709616	-0.0218846	-0.0830468	0.031239	0.0137427	0.0398942	0.000855981	0.0305325	-0.00890694	0.00784318
14	16.8	0	0.0198964	0.0975087	-0.0141194	-0.0996311	0.0218388	-0.00178021	-0.0198254	-0.0104759	-0.00886392	0.0115407	-0.13202	-0.0478213	-0.0116228	0.0346696	0.0194645	0.0314141	-0.00525679	0.0095861
15	18	0	0.00921127	0.0793492	-0.016422	-0.133228	-0.0318628	-0.00912447	-0.227616	0.00491573	-0.0199279	0.00512035	-0.076332	-0.147522	-0.00180662	0.0120122	0.0323826	0.000535569	-0.00297112	0.0159598
16	19.2	0	0.0329142	0.125358	-0.00453883	-0.163755	0.0893313	0.0175655	-0.205025	-0.00162223	0.0554013	0.00302899	0.287246	0.0815986	-0.0116199	-0.0968477	0.00243671	-0.0376132	0.00477708	-0.0157623
17	20.4	0	0.0260898	0.369008	0.00875008	-0.192235	0.0512351	0.0257968	-0.111616	0.0145482	0.00687456	0.00150068	0.0669683	0.0252506	-0.0219436	0.0659333	-0.0209161	-0.0432004	-0.0108636	-0.0232289
18	21.6	0	0.0343453	0.388172	0.01933	-0.231489	0.119485	-0.0112088	-0.281125	0.0115486	-0.00232381	0.017866	0.130571	0.0463068	-0.0324468	0.0714953	-0.0285695	-0.0449751	-0.018172	-0.0215207
19	22.8	0	0.0300984	0.520825	0.00825663	-0.26888	0.133143	0.0116689	-0.422742	0.617887	0.0101086	-0.0335187	-0.0248002	0.0505791	-0.0280971	2.35834	-0.0344119	-0.0528521	0.372288	-0.00294974
20	24	1	0.0308187	1.67334	-0.00143171	-0.318662	2.6182	-0.0158959	-0.294948	1.19265	0.00921239	0.0314525	0.052356	-0.0052841	-0.000408064	2.27823	0.00472411	-0.0594583	0.896282	0.0370302
21	25.2	1	0.0416419	3.35682	-0.00469906	-0.347569	4.19536	0.0161369	-0.432016	1.10705	0.0282455	0.0129447	3.32473	-0.0243977	0.0400088	1.83705	-0.00833643	0.048794	0.930124	-0.0213113
22	26.4	1	0.0483033	2.75582	-0.00524947	-0.424955	3.25649	-0.0154796	-0.544179	0.884005	-0.0251419	0.0053836	3.19872	-0.277428	0.030511	1.38287	-0.0239507	0.0833363	0.729231	0.00431499
23	27.6	1	0.0332334	2.44735	0.00770323	-0.37711	2.67648	-0.027047	-0.510392	0.674572	0.000380577	-0.00160712	2.32124	-0.200306	0.0291833	1.00786	-0.0325	0.0445464	0.570287	-0.0229533
24	28.8	1	0.033463	1.56847	-0.011177	-0.406401	2.19888	-0.0473179	-0.582117	0.503053	-0.0110932	-0.00856858	1.99521	-0.081208	0.00351175	0.724044	-0.0491127	0.000947741	0.359399	-0.0394351
25	30	1	0.0158517	1.09897	-0.00534364	-0.431799	2.09864	-0.012232	-0.426338	0.640203	0.00902289	0.0152481	1.24865	0.0188613	-0.0110069	0.370545	-0.043908	-0.0420555	0.224987	-0.0213351
26	31.2	0	0.0289558	0.794668	0.00467989	-0.50155	1.79545	-0.0286239	-0.519096	0.31338	0.00770671	0.0920729	0.821555	-0.157943	0.022475	0.270846	-0.0574526	0.0354557	0.130646	-0.0462831
27	32.4	0	-0.00257199	0.385403	-0.000529013	-0.449171	1.65421	-0.000958434	-0.762072	0.191155	0.010994	0.0407101	0.611927	-0.271736	0.0234495	0.23714	-0.0694538	0.0118588	0.100958	-0.023879
28	33.6	0	-0.0018977	0.452794	-0.0162399	-0.489324	1.72848	-0.00383464	-0.788799	0.143962	-0.0245812	0.0556276	0.756417	-0.135933	0.00585355	0.192744	-0.063819	-0.0515011	0.0550411	-0.00182649
29	34.8	0	0.0161281	0.408579	-0.0475353	-0.510794	1.60918	-0.0307423	-0.589163	0.115148	0.0238435	0.0222242	0.552302	-0.0487291	0.0164462	0.107631	-0.0748956	-0.0512149	0.0457102	-0.0326978
30	36	0	0.0128646	0.289084	-0.0447341	-0.482211	1.50366	0.236435	-0.778004	0.107816	0.0292833	0.0346993	0.475392	0.0635709	0.0160454	0.0906474	-0.0807457	-0.058073	0.0412774	-0.0298859
31	37.2	0	0.0274459	0.416691	-0.0460706	-0.518377	1.60576	-0.0208987	-0.686276	0.109595	0.0541685	0.0319571	0.345686	0.107048	0.0602051	0.0189745	-0.0874164	-0.0683773	0.00238636	-0.0580375
32	38.4	0	0.0406721	0.46814	-0.0562416	-0.585883	1.56754	0.0325098	-0.816052	0.124584	0.062906	0.0113798	0.261599	0.0445775	0.0491132	0.0517138	-0.0837671	-0.0565388	-0.00975079	-0.0438033
33	39.6	0	0.0405358	0.3399	-0.0623066	-0.604045	1.59945	0.0246308	-0.723399	0.139899	0.0852685	0.0239134	0.167386	0.127985	0.0454355	-0.0396714	-0.0932643	-0.0587027	0.00247987	-0.0204496
34	40.8	0	0.0166762	0.434411	-0.07015	-0.634308	1.62122	0.0219682	-0.720704	0.128982	0.0818089	0.0266702	-0.127911	0.00584471	0.0263335	-0.192816	-0.0946674	-0.0546955	-0.00469461	-0.0691332
35	42	0	0.0515423	0.24233	-0.0486044	-0.667515	1.74145	0.0217737	-0.707084	0.159303	0.102632	0.00499604	0.120175	-0.00448712	0.0117469	-0.293118	-0.096635	-0.0771359	-0.0124797	-0.0849162
36	43.2	0	0.052602	0.21815	-0.0292764	-0.687157	1.78511	0.0158757	-0.915603	0.154908	0.112174	0.0400886	0.0840164	-0.0259577	0.0190821	-0.18212	-0.0974884	-0.0588401	-0.00440024	-0.0963841
37	44.4	0	0.0750093	0.359191	-0.0422316	-0.687389	1.71458	0.0445262	-0.798825	0.16109	0.110885	0.0214345	0.298876	-0.123709	0.0507431	-0.127591	-0.0830385	-0.0514782	0.0111343	-0.10173
38	45.6	0	0.0572619	0.242598	-0.0420273	-0.730543	1.68489	0.0721713	-0.64798	0.173674	0.108752	0.0469038	0.200194	-0.0411136	0.0226087	-0.108465	-0.0962916	-0.0211836	-0.00844057	-0.0661933
39	46.8	0	0.0648676	0.120067	-0.0458187	-0.735891	1.68229	0.0650733	-0.856125	0.178127	0.134708	0.0487246	0.157411	-0.0139859	0.0103679	-0.078063	-0.0966822	0.0559154	-0.000699298	-0.0159468
40	48	0	0.0669461	0.0580937	-0.020421	-0.704428	1.63885	0.04405	-0.948771	0.162326	0.142218	0.0344141	0.12586	-0.062476	-0.00747552	-0.0281079	-0.0930931	0.00727916	-0.000695835	-0.0528391
41	49.2	0	0.067193	0.268312	-0.0288446	-0.727308	1.58914	0.113082	-0.839682	0.179915	0.120017	0.0601467	0.150754	-0.0294374	-0.00877481	-0.0485097	-0.0969229	-0.0133523	-0.0210672	0.00669931
42	50.4	0	0.0962885	0.149732	-0.0399194	-0.757219	1.69466	0.0954177	-1.02662	0.188255	0.0927898	0.0700039	0.0894246	0.0545376	-0.00370671	-0.00802221	-0.0855876	-0.0520163	-0.0219941	-0.0343214
43	51.6	0	0.0965014	0.298148	-0.0440606	-0.766126	1.76466	0.14537	-0.642242	0.183857	0.0924083	0.0666913	-0.0483134	-0.0254352	0.0389609	-0.041701	-0.0902378	-0.0522797	0.0156213	-0.0344863
44	52.8	0	0.0859801	0.0628494	-0.0575795	-0.768747	1.687	0.234072	-0.837092	0.199013	0.0991109	0.0789251	-0.0245037	0.0361303	0.0349709	-0.0822367	-0.0973304	-0.0401206	0.00469974	-0.0454995
45	54	0	0.0663893	0.0105814	-0.0336245	-0.728797	1.70451	0.201278	-0.8128	0.180467	0.12153	0.0782304	-0.0679922	0.174248	0.0140611	-0.0592421	-0.095568	0.041478	0.00383511	-0.0460031
46	55.2	0	0.0590535	0.060907	-0.0183313	-0.732385	1.60049	0.249806	-0.506331	0.175605	0.113547	0.0707424	-0.0358383	0.155358	0.0185873	-0.0733804	-0.0421064	-0.0006437	-0.0206597	-0.0587104
47	56.4	0	0.0488082	0.248895	-0.0407251	-0.77128	1.66267	0.277662	-0.56476	0.20676	0.115579	0.0579968	-0.190542	0.171127	-0.00307183	-0.031589	-0.0433001	-0.0268739	-0.00348135	-0.022696
48	57.6	0	0.0483767	0.267441	-0.0410281	-0.813745	1.71948	0.256885	-0.709077	0.250365	0.112224	0.0333757	-0.163018	0.0636356	-0.000175426	0.0400177	-0.0315748	-0.0387009	0.00578139	-0.0825047
49	58.8	0	0.0868584	0.304512	-0.0650826	-0.85216	1.72043	0.289128	-0.507854	0.23383	0.121882	0.0369515	-0.231134	0.0672177	0.00134434	0.0156228	-0.0334055	-0.0551534	-0.00231081	-0.0946325
50	60	0	0.0592452	0.442799	-0.0321614	-0.836502	1.80424	0.248234	-0.579897	0.222598	0.132419	0.0462091		-0.0433851	0.0174544	0.0172309	-0.0394861	-0.0631908	-0.00392117	-0.0982573
51	61.2	0	0.0879998	0.501802	-0.0443202	-0.877049		0.320396	-0.520597	0.220547	0.119023	0.0453828		-0.0451967	0.0470872	-0.135989	-0.0433915	-0.0670148	0.00828293	-0.0831863
52	62.4	0	0.0823993	0.565145	-0.053511	-0.871722		0.232938	-0.536354	0.229606	0.1128	0.0490171		-0.0755456	0.0225502	-0.169569	-0.0168974	-0.068778	0.00863964	-0.0843844
53	63.6	0	0.0875722	0.649519	-0.0278903	-0.925472		0.171474	-0.586893	0.248905	0.137853	0.0884093		-0.0067749	0.0519447	-0.0464981	-0.0437037	-0.0637518	0.0777016	-0.096103
54	64.8	0	0.102074	0.733008	-0.0377967	-0.948165		0.154136	-0.551287	0.23956	0.115038	0.0772651		0.0158564	0.00649333	-0.00453207	-0.0408999	-0.0539856	0.0832068	-0.0900842

## Sheet: 20211103_SS50091_Rattle
Responses of Rattle (SS50091) to taste detection in food-deprived animals
Frame	Time (seconds)	Taste stimulus	20211103_Fly1_water	20211103_Fly1_sugar	20211103_Fly1_bitter	20211103_Fly2_water	20211103_Fly2_sugar	20211103_Fly2_bitter	20211103_Fly3_water	20211103_Fly3_sugar	20211103_Fly3_bitter	20211103_Fly4_water	20211103_Fly4_sugar	20211103_Fly4_bitter	20211103_Fly5_water	20211103_Fly5_sugar	20211103_Fly5_bitter	20211103_Fly6_water	20211103_Fly6_sugar	20211103_Fly6_bitter
0	0	0	0.0256015	0.0879828	0.0550156	0.0318976	0.00943224	0.0283323	-0.0333883	0.00568942	0.049	0.0865728	0.042569	0.101	-0.0665177	0.0544597	0.0722155	-0.0264852	-0.00221088	-0.000147017
1	0.67	0	-0.0230378	0.0363102	0.0871323	0.00623305	0.0111939	-0.000517934	0.00721399	0.0196479	0.113823	0.046684	0.030833	0.0154391	-0.0159058	0.0468765	0.015759	-0.00778328	0.0290701	0.00782762
2	1.34	0	-0.0343548	0.0723893	0.0382124	0.0167823	-0.0323063	-0.0196604	0.0111856	0.00931642	0.0269131	0.0619863	-0.0113802	0.0371385	-0.0346738	-0.0226635	0.0290191	0.00280886	0.0306468	0.026419
3	2.01	0	-0.0193993	0.0146566	-0.00494148	-0.00461511	0.015845	0.0069187	0.0124711	0.00498472	0.045076	-0.00680062	-0.0317926	0.0104787	-0.0356158	-0.0333215	-0.0022398	-0.0115794	0.0576881	-0.00234775
4	2.68	0	-0.0306525	-0.0485139	-0.0871801	0.0362595	0.0186999	0.0071604	0.0355384	0.0148468	-0.0478089	-0.0360997	-0.0467904	-0.00648751	-0.0507212	-0.042156	-0.0568109	-0.00139004	0.0244632	-0.0228469
5	3.35	0	-0.0847146	-0.0927048	-0.0501124	0.032997	0.00430895	0.00459085	0.00201634	0.0321334	-0.0764771	-0.0626699	-0.128853	0.0228248	-0.0413045	-0.0528921	0.0158685	-0.0036048	0.000948971	-0.00606106
6	4.02	0	-0.0127046	-0.200787	-0.105575	0.0244096	0.00372692	0.0294984	0.0110009	-0.00631914	-0.0705215	-0.0150938	-0.0521403	0.0308776	-0.0179306	-0.0227854	0.00766467	-0.00751908	-0.0266889	-0.0133967
7	4.69	0	0.0845182	-0.0978801	-0.0530095	0.020317	0.0227024	0.00357647	0.0143677	0.00695705	-0.0808771	-0.0313817	-0.0187662	0.0229094	0.000271662	-0.0608235	-0.0460318	-0.0153865	-0.0213211	-0.0315889
8	5.36	0	0.0329008	-0.0366628	-0.0465464	0.0220384	0.0265294	0.0102156	-0.0217453	-0.013688	-0.103701	-0.0370428	-0.0341842	-0.00138964	0.000924506	-0.0324688	0.03326	-0.00763756	-0.00961494	-0.00405984
9	6.03	0	0.0457069	-0.0323824	-0.0296268	0.0183874	-0.0165561	-0.025754	-0.00499275	-0.00813656	-0.0878054	-0.0423202	-0.0177795	0.000714754	0.029925	-0.0337229	-0.0199254	0.014763	-0.00752013	-0.0109698
10	6.7	0	0.0475714	-0.0157858	-0.00809694	-0.00246949	0.00270874	-0.0150127	-0.00782429	-0.0140685	-0.0758022	-0.0557832	-0.0471804	-0.0312028	0.016287	0.0204015	-0.0300268	-0.01405	-0.00332112	0.0200349
11	7.37	0	0.0190011	-0.000641556	-0.0173929	-0.037541	-0.0117613	-0.00753984	-0.00215784	-0.0239182	-0.0488374	-0.0107197	-0.0230411	-0.057051	0.00601487	0.0254851	-0.019126	0.00450701	-0.0274639	0.0110208
12	8.04	0	-0.0378071	-0.0421863	0.0357453	-0.0242796	-0.0159594	0.0194107	0.0168039	-0.0195171	-0.0185428	-0.0044839	-0.0405231	-0.0500497	0.0189817	0.00198876	0.0411247	0.0163229	-0.00371754	0.0342204
13	8.71	0	0.0328453	0.0623729	0.0461883	-0.033372	-0.022409	0.0117956	0.00867523	0.0120354	0.0559707	0.0314266	-0.00476159	-0.074307	0.0358962	-0.0174152	-0.0334617	0.0243744	-0.00385269	-0.00888227
14	9.38	0	-0.000520774	0.0474834	0.0273547	-0.0297619	-0.00987563	-0.0332899	-0.024502	-0.00509705	0.0272818	0.013146	-0.00640653	-0.0421637	0.0631622	0.015883	-0.0217166	-0.0170597	-0.0333611	0.0165802
15	10.05	0	-0.0294162	0.0710152	0.0521105	-0.0270121	-0.0124872	0.000141811	-0.000237776	0.0106477	0.0665078	0.0320429	0.0133373	-0.00745382	0.0512051	0.0332809	-0.0385251	-0.0290651	-0.0223274	0.00105288
16	10.72	0	-0.0067071	0.0861454	0.0532546	-0.0139817	0.00139932	-0.0068971	0.0109456	-0.00328755	0.0577819	0.0307983	0.0280226	-0.0165193	0.0267753	0.0359268	0.0235078	0.00893838	-0.00100611	0.00122496
17	11.39	0	0.0068435	0.0814309	-0.0124171	-0.0159763	-0.00616072	-0.00682598	-0.0287337	-0.019727	0.0409818	-0.0323087	0.177104	0.0511215	0.0321311	0.0385724	0.00232914	0.015708	0.0101847	-0.00256509
18	12.06	0	-0.015674	0.00775806	0.0198849	-0.0203126	0.0109689	-0.00614308	-0.00663686	-0.00249967	0.127037	0.0320474	0.171733	-0.00588015	-0.0189052	0.0453743	0.0271156	0.0541379	0.00940378	-0.0155154
19	12.73	0	-0.011543	-0.0211443	0.00361907	-0.0156902	-0.00553642	-0.00551017	-0.0250549	-0.0170135	0.0951092	-0.00874787	0.1397	-0.00368066	-0.0512357	-0.0106206	0.00659075	0.0316405	0.00610796	0.00581281
20	13.4	0	-0.0619901	-0.0792286	0.0369585	0.0113629	0.00428623	-0.0183475	0.0104424	-0.00221596	0.0655197	-0.000997072	0.133561	0.0184772	-0.0211155	0.0237245	-0.0412023	0.00522377	0.00961164	-0.0198439
21	14.07	0	0.0949076	-0.0348828	0.0253583	0.00636263	-0.0264957	-0.0188091	-0.00270561	-0.0158776	0.0991534	0.0156923	0.0675847	-0.0321167	-0.0909228	0.0173584	-0.0103117	0.0251531	-0.0142784	-0.0177776
22	14.74	0	0.0379765	-0.0648967	0.0172417	-0.00644996	-0.00641801	-0.00170087	0.00385994	-0.0165702	0.118797	0.000216454	0.077776	0.00713205	-0.108014	0.0101317	0.0107364	0.0555634	-0.00316374	0.00585183
23	15.41	0	-0.0668154	-0.0349222	0.000633728	-0.00713006	-0.0193688	0.00525936	-0.00665384	-0.0184484	0.103631	-0.00705091	-0.00992189	-0.00212994	-0.0874563	-0.00124702	0.085546	0.0568714	0.00396994	-0.019309
24	16.08	0	-0.118769	-0.0356084	-0.0596999	-0.00879132	-0.0138863	0.00096584	0.0079501	-0.00259554	0.0948406	-0.0193705	0.00350053	0.0065334	-0.0418735	0.0279704	0.012268	0.0710927	0.045818	-0.0262837
25	16.75	0	-0.0332733	-0.0750572	-0.0556246	-0.0346629	0.00447485	-0.00401013	0.0488911	0.00809531	0.0685998	-0.0457648	-0.0449213	-0.0374432	-0.0406993	0.0324337	0.0108759	0.0569229	0.0231058	0.00385842
26	17.42	0	-0.0966919	-0.0344387	-0.0529927	-0.0200634	-0.00482598	-0.0141515	0.0335888	0.0194948	0.0741056	-0.0518789	-0.0247517	-0.00557786	-0.0448956	0.024475	0.0472414	0.0484509	0.002112	0.00309251
27	18.09	0	-0.115158	-0.0405446	-0.0654713	-0.00464712	0.0275721	-0.0189817	0.0303194	0.00958226	0.0787507	-0.044534	-0.0331423	-0.0349163	-0.0966063	0.0305937	0.0437412	0.0530648	0.036668	-0.0127716
28	18.76	0	-0.0659064	-0.0179398	-0.0247928	-0.0123252	0.0199159	0.00342944	0.0182214	0.00371386	0.0482717	-0.0561221	0.0366244	-0.0462801	-0.0394243	0.0353037	0.0436129	0.0259656	0.0174585	-0.0125957
29	19.43	0	-0.117192	0.00775172	-0.0640176	0.0236653	0.00665244	0.00484068	0.0571843	0.000506595	0.0627957	-0.0198948	-0.0219907	0.0653209	-0.0604093	0.0104734	0.040779	0.0237675	0.0187602	-0.00512189
30	20.1	1	-0.18398	0.491347	-0.0709163	-0.0207833	-0.00255332	0.0190439	0.0518536	-0.00867333	0.0530539	-0.02692	-0.0153479	0.0123943	-0.0455951	0.0372903	0.0280074	0.0278454	-0.0103544	-0.00588548
31	20.77	1	-0.120565	0.744071	-0.0753979	0.00362013	0.0675369	0.0161167	0.0821802	0.0784011	0.0961889	-0.0759837	0.0468758	-0.0231157	-0.0362661	0.0370079	0.0625139	0.00306748	0.00106768	0.00596308
32	21.44	1	-0.0974803	0.780962	-0.079312	0.00187669	0.600267	0.0486808	0.097826	0.546232	0.0101392	-0.0197523	0.262627	-0.0533274	-0.0336307	0.30683	0.0754928	-0.0271348	0.0359883	0.00877569
33	22.11	1	-0.0745879	0.749264	-0.0403566	0.0426803	0.829094	0.0424165	0.0467476	0.696909	-0.0557322	-0.0577075	0.948784	-0.0435666	0.0215056	0.710542	0.0142264	-0.00208742	0.0662833	0.00153842
34	22.78	1	-0.029626	0.809783	0.051024	0.0226155	0.913941	0.0588283	0.0631104	0.767583	-0.129997	-0.0692779	1.29843	-0.0438373	0.0119026	0.752227	0.0285298	0.0392436	0.240834	0.0407848
35	23.45	1	-0.0485593	0.692125	0.0425017	0.0516548	0.930757	0.0603873	0.0188316	0.711236	-0.0789688	-0.031762	1.37611	-0.0312779	0.0427608	0.766998	0.023655	-0.00953215	0.714974	0.0226821
36	24.12	1	-0.0608523	0.666408	0.0452808	0.0516418	0.909394	0.0609401	0.0484735	0.705586	-0.04101	-0.0410943	1.2933	0.010048	-0.0166724	0.746526	0.0342838	-0.00446896	0.888057	0.0147428
37	24.79	1	-0.0113273	0.65567	0.0392449	0.0341637	0.873934	0.0253477	0.0161151	0.693117	0.0114106	-0.063777	1.3246	0.134719	0.0537001	0.672365	0.0265442	-0.0144202	0.846822	0.00519836
38	25.46	1	-0.0518059	0.604722	0.109606	0.0441368	0.84223	0.016916	0.0447418	0.666866	-0.0524702	-0.0564638	1.40769	0.124995	0.0617409	0.625965	0.0450059	-0.0215641	0.867105	0.0214275
39	26.13	1	-0.0194929	0.526485	0.0174328	0.0687614	0.780805	-0.0223632	0.0393461	0.623582	-0.0602718	-0.0387531	1.43796	0.0756246	0.0988361	0.566666	0.0163034	-0.0208098	0.788797	0.00429511
40	26.8	1	-0.0520851	0.452025	0.0458571	0.0384384	0.721812	-0.0127217	0.0495195	0.601989	0.0111747	-0.0568036	1.45308	0.0527238	0.0420543	0.456198	0.0499979	-0.00322254	0.790571	-0.0185333
41	27.47	0	-0.0171158	0.42385	0.0484699	0.0400482	0.651278	0.0103422	0.0428462	0.590925	-0.0671866	-0.0171204	1.54035	0.0072624	0.0968658	0.348	0.0253241	-0.00939421	0.778197	0.0163538
42	28.14	0	-0.100953	0.438287	0.0696636	0.0338303	0.55132	-0.0183114	0.0162448	0.596601	0.0609323	-0.0269648	1.67701	-0.0530135	0.0462463	0.327077	0.0667837	0.0136145	0.7589	-0.0110404
43	28.81	0	-0.0651146	0.428541	0.0592613	0.0662528	0.476328	0.01726	0.0721101	0.553394	0.108523	-0.0420055	1.71985	-0.0534199	0.0650906	0.314472	0.0346558	-0.0076506	0.630544	-0.0240213
44	29.48	0	-0.0782098	0.47352	0.0874886	0.0406395	0.36331	0.00140651	0.0327987	0.510719	0.134444	-0.0887345	1.50574	-0.0530222	0.0226605	0.280557	0.0577461	-0.0443575	0.471691	-0.0108472
45	30.15	0	-0.10596	0.423907	0.0852865	0.0280141	0.305571	0.0133485	0.0163544	0.453215	0.160334	-0.076269	1.20921	-0.0289327	0.0187996	0.295821	0.0438316	-0.0289834	0.385108	-0.0232306
46	30.82	0	-0.111028	0.40377	0.0771564	0.0134597	0.31644	0.0448654	0.0642634	0.399218	0.156857	-0.00783152	1.00895	-0.0531951	0.0289434	0.253021	0.0380861	-0.03148	0.344979	0.0300229
47	31.49	0	-0.0780355	0.267092	0.11254	0.0134288	0.276717	0.054288	0.0366694	0.366454	0.123826	-0.0137801	0.881765	-0.0405599	0.0247269	0.255709	0.0849769	-0.00769076	0.277459	-0.0443683
48	32.16	0	-0.101917	0.135813	-0.0185018	-0.0250895	0.193128	0.030919	-4.93561e-05	0.34287	0.138664	0.00651598	0.757082	-0.0518194	-0.00566083	0.172391	0.038483	-0.0395913	0.221468	-0.0142889
49	32.83	0	-0.160432	0.171328	0.0643007	-0.031657	0.16018	0.0640867	0.0144878	0.328347	0.153618	-0.000666403	0.717767	-0.0327861	-0.0185068	0.193382	0.101214	-0.0268575	0.199186	-0.0121389
50	33.5	0	-0.0567074	0.151707	0.0371247	-0.0152711	0.151804	0.0293897	0.000835847	0.306492	0.165256	0.0154304	0.723506	0.0368571	-0.0343166	0.171272	0.0603775	-0.0104631	0.14473	0.00915187
51	34.17	0	-0.0655782	0.109738	0.0369084	-0.0257519	0.131683	0.0324594	0.0211056	0.330925	0.0889535	0.0298792	0.80652	0.0086749	-0.0462733	0.152523	0.060792	0.00917735	0.122423	0.0144285
52	34.84	0	-0.0422089	0.124261	0.00585196	-0.0213374	0.128721	0.00640164	-0.0189607	0.299209	0.102091	0.0276634	0.709675	-0.0252165	0.0311317	0.114825	0.108096	0.0191205	0.110778	0.0180595
53	35.51	0	-0.0533077	0.13764	0.0114061	0.000194814	0.078133	-0.0256384	0.0344239	0.284705	0.154357	0.0129555	0.65034	-0.0344103	-0.035857	0.154123	0.0616816	-0.00501914	0.0690462	-0.0306792
54	36.18	0	-0.10681	0.0799062	0.0190205	-0.026444	0.0799434	0.00276133	0.0334835	0.250039	0.139946	0.0558761	0.601193	-0.0107617	-0.0286029	0.156335	0.0634425	0.017839	0.0929423	-0.0144897
55	36.85	0	0.0136603	0.0628437	0.031295	0.0144578	0.0651566	-0.00578148	0.0584003	0.256545	0.13373	0.00326839	0.588884	-0.0376641	-0.00252007	0.11643	0.0343669	0.0282024	0.273683	-0.0087933
56	37.52	0	-0.0340593	0.0551884	0.0346641	0.0390432	0.0782921	-0.000544326	0.0241957	0.295646	0.127902	0.0297586	0.671068	-0.0242545	-0.00589826	0.136847	0.0419565	0.0276804	0.24895	-0.00362942
57	38.19	0	0.0145295	0.0425218	-0.00288553	0.0288096	0.087644	0.0409674	0.022154	0.264616	0.123602	0.0375764	0.616347	0.177888	-0.0198208	0.110927	0.0110856	0.0303225	0.223492	-0.0211833
58	38.86	0	-0.0146823	0.0779048	0.0308612	0.000916829	0.0945055	0.0186906	0.0144215	0.270643	0.184459	0.0234734	0.598513	0.169634	0.0173991	0.112448	0.0266749	0.0168746	0.239732	0.0107638
59	39.53	0	-0.0351697	0.0939339	0.0644817	-0.00919463	0.131096	0.0222778	0.0523111	0.270584	0.165953	0.0241184	0.597895	0.126908	0.028782	0.0687517	0.0151743	0.0558989	0.238161	0.00870312
60	40.2	0	-0.045478	0.168278	0.016506	-0.0128527	0.145276	0.0308459	0.0786843	0.254062	0.11828	0.0774421	0.527064	0.0406862	0.000816252	0.109585	0.0489211	0.0434822	0.24673	0.0121303
61	40.87	0	-0.0670345	0.13986	0.0866384	-0.0073489	0.152943	0.0475344	0.0631735	0.228468	0.11078	0.0900527	0.515825	-0.0167095	0.0324319	0.106213	0.0352542	0.0551499	0.325883	0.0114344
62	41.54	0	-0.0581667	0.16988	0.0891629	-0.00717714	0.176087	0.0565401	0.0541246	0.219761	0.176844	0.0976568	0.569484	0.0335985	0.0651315	0.110463	0.0302081	0.0742538	0.331681	0.0692948
63	42.21	0	-0.0928822	0.176122	0.0895458	-0.0134323	0.153747	0.0484706	0.0430299	0.197195	0.156534	0.0716575	0.585892	0.0352551	0.0523769	0.120758	0.0757469	0.0645373	0.314439	0.0292258
64	42.88	0	-0.0869319	0.193269	0.0667357	0.0162314	0.12884	0.05737	0.0208027	0.208119	0.169046	0.0369573	0.502202	0.0652705	0.0249974	0.155985	0.0388766	0.074756	0.340674	0.0603285
65	43.55	0	-0.0422157	0.183731	0.130903	0.00113641	0.171967	0.0612832	0.0633923	0.16949	0.156474	0.0589468	0.517219	0.1308	0.0181574	0.119586	0.0740521	0.0645484	0.308971	0.043923
66	44.22	0	-0.0616492	0.178402	0.152789	-0.00105543	0.183808	0.0323086	0.0461616	0.177901	0.116506	0.164798	0.560009	0.116492	0.0507458	0.17291	0.063192	0.0986762	0.297099	0.0384005
67	44.89	0	-0.0425907	0.171842	0.187413	0.036959	0.174244	0.052104	0.0381084	0.151953	0.0983779	0.112853	0.540113	0.0740271	0.0279672	0.100046	0.101102	0.0553835	0.252551	0.0497947
68	45.56	0	-0.00260682	0.118475	0.181973	0.00518339	0.137531	0.0297958	0.0504016	0.16331	0.152379	0.101968	0.5835	0.045838	0.0731054	0.122614	0.0458829	0.0775148	0.26004	0.00697933
69	46.23	0	-0.057806	0.105779	0.0951035	0.0111493	0.119267	0.0384108	0.0585484	0.14865	0.166403	0.0435704	0.592882	0.0312542	0.0322764	0.126145	0.0741587	0.0807324	0.283658	0.0288329
70	46.9	0	-0.0621191	0.0553304	0.161491	0.0130905	0.103174	0.0145779	0.0500742	0.134397	0.177936	0.0353238	0.541598	0.0149239	0.047957	0.143443	0.0489062	0.0746446	0.223886	0.00241669
71	47.57	0	-0.0486177	0.0618239	0.176384	0.0325449	0.112702	0.0526312	0.0305185	0.118812	0.16049	0.0446325	0.527413	-0.0307331	0.0321095	0.127896	0.0850526	0.0808814	0.212897	-0.00227608
72	48.24	0	-0.0557756	0.116987	0.145856	0.00227923	0.0902711	0.0495517	0.0217994	0.121827	0.16424	0.0611897	0.516129	-0.0594383	0.0710815	0.123539	0.11942	0.0650638	0.192939	-0.0282039
73	48.91	0	-0.068414	0.0991447	0.157403	-0.0254544	0.128417	0.0699912	0.0445937	0.134959	0.184542	0.020736	0.547975	-0.01893	0.0310571	0.12666	0.161435	0.081268	0.179153	-0.0105148
74	49.58	0	-0.0161492	0.0244373	0.148809	0.00992313	0.123896	0.0671724	0.0176614	0.183974	0.208147	0.0500707	0.437855	-0.047215	0.0270437	0.147545	0.0961796	0.0812763	0.158202	0.0161427
75	50.25	0	0.0157372	0.109623	0.0866691	-0.0101028	0.11977	0.0696375	0.0458693	0.107758	0.145516	0.0545326	0.38741	-0.0129141	0.0607335	0.12925	0.120497	0.034413	0.186233	0.0159845
76	50.92	0	-0.0538086	0.151552	0.131835	0.00295278	0.161391	0.09526	0.0244805	0.137966	0.166641	0.0554121	0.423801	-0.0386787	0.0589989	0.180343	0.0855244	0.0434988	0.178945	0.032469
77	51.59	0	0.00578051	0.153267	0.110047	0.0315708	0.156801	0.0671497	0.030242	0.139821	0.151138	0.0693024	0.402305	-0.0510762	0.051468	0.135568	0.109906	0.0330036	0.163551	0.0334138
78	52.26	0	0.0689867	0.162265	0.140532	0.0275886	0.1559	0.0801087	0.0429342	0.141011	0.0857348	0.156292	0.415551	-0.0327469	0.0196715	0.14694	0.0904458	0.00852283	0.151073	0.025149
79	52.93	0	0.0517541	0.115253	0.0970961	0.0204158	0.176373	0.0723178	0.0660926	0.108123	0.125602	0.0620386	0.533359	-0.0206048	0.0979283	0.145499	0.0520642	-0.0208765	0.0983374	0.0571795

## Sheet: 20210322_SS37122_Usnea
Responses of Usnea (SS37122) to taste detection in food-deprived animals
Frame	Time (seconds)	Taste stimulus	20210322_Fly1_water	20210322_Fly1_sugar	20210322_Fly1_bitter	20210322_Fly2_water	20210322_Fly2_sugar	20210322_Fly2_bitter	20210322_Fly3_water	20210322_Fly3_sugar	20210322_Fly3_bitter	20210322_Fly4_water	20210322_Fly4_sugar	20210322_Fly4_bitter	20210322_Fly5_water	20210322_Fly5_sugar	20210322_Fly5_bitter	20211116_Fly6_water	20211116_Fly6_sugar	20211116_Fly6_bitter	20211116_Fly7_water	20211116_Fly7_sugar	20211116_Fly7_bitter
0	0	0	0.0104074	0.0406902	-0.0753977	0.0824728	0.0905202	0.0722229	-0.0306613	-0.0840037	0.065478	0.421707	-0.0317216	-0.0587586	0.0243046	0.0190177	0.039361	0.0326906	-0.272599	-0.186521	0.155584	0.0567437	0.0751181
1	1.2	0	-0.00230065	0.0348807	-0.00697547	0.118828	0.0365867	0.0410924	-0.000345319	-0.0374983	0.0243399	0.250625	-0.0590341	0.0173253	0.0113488	0.00228556	0.0112875	0.0214252	-0.236242	-0.108715	0.104642	-0.0351732	0.0545704
2	2.4	0	-0.00372104	0.00660809	-0.0615605	0.0483826	0.0114639	0.0326743	0.055395	0.0282841	0.00999449	0.198736	-0.0649317	0.0535329	0.0135946	0.00107351	0.0194415	0.0306493	-0.232608	-0.0787081	0.0588694	-0.0857175	0.0496109
3	3.6	0	-0.0114207	0.018504	-0.0695092	0.0480044	0.0324743	0.0430322	0.0523353	0.021304	0.0124945	0.0621165	-0.0491602	0.0722558	0.018848	-0.00703147	0.00354495	0.0533325	-0.233707	-0.0655303	0.0686941	-0.100349	0.0439496
4	4.8	0	-0.00353203	0.0157203	-0.0844828	0.0479684	0.0518561	0.0358156	0.0397748	0.0306455	0.0129734	0.0648301	-0.0378818	0.0640731	0.00925779	0.00751245	0.00207975	0.0831986	-0.202272	-0.0766693	0.0412895	-0.0798789	0.0528358
5	6	0	0.00592053	0.0109953	-0.0558127	0.0514406	0.0405726	0.0394886	0.0434091	0.0146441	0.028239	0.0114446	-0.0616779	0.0464081	7.13268e-05	0.00517502	0.00488518	0.0911825	-0.188329	-0.0628058	0.039621	-0.0548543	0.0437289
6	7.2	0	0.0101699	0.0110179	-0.0327221	0.0135266	0.0117674	0.0273419	0.032631	0.0176811	0.00620943	0.0071462	-0.0564773	0.0498011	0.00087157	0.0121511	0.0225827	0.0767122	-0.120832	-0.0526491	0.0320807	-0.0438886	0.0623842
7	8.4	0	-0.00944572	0.0129351	-0.061657	-0.0136705	0.00984385	-0.0116027	0.0325192	0.0299767	0.0279664	0.015379	-0.0404964	0.0566409	0.0193768	5.82581e-05	0.0473189	0.0701208	-0.0782215	0.00997751	0.0238242	-0.0218102	0.0670993
8	9.6	0	-0.00811025	0.00256736	-0.0166784	0.00228267	-0.0231098	-0.0220404	-0.00984085	0.0412842	0.00622503	0.0339217	-0.0454502	-0.00261248	-0.000718219	-0.00640342	0.0314874	0.0537809	-0.0226609	0.00106262	0.00918022	-0.016281	0.0525756
9	10.8	0	-0.00993663	-0.000548468	-0.00533442	0.0153462	-0.0447143	-0.0264269	-0.0149014	0.0285368	0.00972831	0.0323667	-0.00126565	-0.013007	-0.00415075	-9.80441e-05	0.0090052	0.0824164	0.0108657	0.00397247	0.013978	-0.0115947	0.0339518
10	12	0	-0.00699036	-0.00312953	-0.0151614	0.0258536	-0.0544228	-0.0414404	0.0392633	0.0278167	0.0148924	0.0546146	-0.0072188	-0.00653167	0.00612857	0.00969997	-0.00540919	0.0776374	0.00484483	-0.00926086	0.0129039	-0.00406252	0.0193965
11	13.2	0	0.00880265	0.0023573	-0.0262682	0.0459479	-0.00701312	-0.0163218	0.0267772	0.0198047	0.00734506	-0.0130911	0.0501077	0.00995155	0.0145137	0.00847513	0.00935962	0.0844672	-0.0133233	0.023007	0.0202438	-0.00512197	0.0243954
12	14.4	0	0.0240955	0.00513742	-0.0340101	0.0282948	0.0330206	0.0608575	0.0126772	-0.00017249	0.00916048	-0.0144763	0.0398152	-0.000962732	-0.00513243	0.00971915	0.00403796	0.00565757	-0.00525326	0.0374635	-0.00482642	-0.00366812	0.0216673
13	15.6	0	-0.00838211	0.0118384	0.0241328	0.00698888	-0.0067876	0.0586464	-0.000910368	-0.00831866	-0.00100075	-0.00678362	0.0173335	0.0326423	-0.00479538	-0.00971844	0.00313972	-0.0424657	-0.00732358	-0.0158775	0.00855007	-0.00440278	0.0232364
14	16.8	0	0.00158894	-0.0033336	0.0475682	-0.0136217	0.0284282	0.00936945	0.00675771	-0.0186382	-0.012407	-0.061561	-0.0194597	0.015958	-0.00165004	0.00321698	0.00869489	-0.0616101	-0.0178442	0.00287896	-0.00331548	-0.0026164	-0.0079636
15	18	0	0.00535275	-0.00093248	0.0330166	-0.037721	0.00399935	0.013713	-0.024368	-0.0254423	-0.0133035	-0.0396035	-0.013235	-0.0058607	-0.00743683	-0.00841332	-0.0109408	-0.0787418	-0.0148655	-0.0284436	-0.0102329	0.0213643	-0.0182926
16	19.2	0	0.00118373	-0.00630405	0.032054	-0.0452731	0.0227614	-0.0173039	-0.0191522	-0.00823529	-0.011399	0.026186	-0.0333669	-0.00803402	0.00597716	-0.00684177	0.00235402	-0.0360175	0.024027	0.00699353	-0.0137345	0.0111797	-0.0283063
17	20.4	0	-0.0157145	-0.00508503	-0.0559974	-0.0258157	0.0247283	-0.0410933	-0.0261434	-0.0153513	-0.00301592	0.0223482	-0.0327104	-0.0241557	-0.00345399	-0.00603966	-0.0202415	-0.0313435	0.0188723	-0.0207335	-0.0235664	-0.00107749	-0.0680849
18	21.6	0	0.151464	-0.0116693	-0.044477	0.0344234	-0.00998786	-0.0404356	-0.0280469	-0.00716557	-0.0326288	-0.0302113	-0.0577864	-0.00324431	-0.00979902	-0.00636221	-0.018471	-0.0111307	0.039153	0.00645604	0.175491	-0.00657581	-0.0710101
19	22.8	0	0.439638	-0.00751527	-0.0244561	0.689608	-0.0478547	0.155837	0.660981	0.0266007	-0.0217852	0.0952811	-0.0440706	0.00294662	0.26284	0.0115585	-0.0203219	1.25513	0.321329	-0.0254226	0.403071	0.0714369	-0.0964385
20	24	1	0.325361	0.0390158	0.0336068	0.806163	-0.00906894	0.0787294	0.730348	0.0332391	-0.0258504	1.16164	-0.0482269	-0.0294938	0.296467	0.020926	-0.00183474	0.895533	0.28831	0.0121831	0.168474	0.0203822	-0.0821355
21	25.2	1	0.19916	0.0455166	0.0420437	0.735938	-0.0273057	0.184604	0.485577	0.00164148	-0.0344717	1.46585	-0.0660488	-0.0645143	0.176984	0.0144807	-0.0185665	0.739879	0.164957	-0.028666	0.0835458	0.0119066	-0.0956263
22	26.4	1	0.114689	0.0227984	0.0629417	0.599316	-0.0336962	0.107103	0.535619	-0.0105601	-0.0309023	1.34452	-0.0348756	-0.0672728	0.154376	0.00797354	-0.0335384	0.590272	0.0541311	-0.0269053	0.0423708	-0.00134816	-0.0543339
23	27.6	1	0.0614542	0.00676679	0.0679255	0.499847	-0.0652033	0.0807215	0.448586	-0.0216872	-0.034891	0.739249	-0.0496786	-0.0895849	0.144329	-0.00253281	-0.0151075	0.517167	0.000345053	-0.0335961	-0.005342	-0.0188175	-0.0390059
24	28.8	1	0.149777	0.0247729	0.0644669	0.424981	-0.0532579	0.0406503	0.255675	-0.0243924	-0.0181203	0.798665	-0.0652836	-0.0832265	0.0974219	-0.0170121	-0.0268314	0.529634	0.00824607	-0.0280173	-0.0261729	-0.0241457	-0.0198538
25	30	1	0.108578	0.0115035	0.0243149	0.260324	-0.0659515	-0.0119121	0.193154	-0.0432769	-0.008023	0.648857	-0.0808	-0.102491	0.0377063	-0.0313556	-0.0235691	0.447028	0.0518073	0.107504	-0.0383178	-0.0412051	-0.0185686
26	31.2	0	0.0572078	0.046339	0.0602277	0.111909	-0.0905187	0.00368385	0.286745	-0.0397351	0.0194607	0.737933	-0.04941	-0.0967471	0.0228231	-0.0256265	-0.0211989	0.335815	0.107516	0.15712	-0.0375229	-0.0829413	-0.0127891
27	32.4	0	0.014256	0.0390866	0.0342025	0.0497624	-0.0352468	0.00691053	0.199506	-0.0439134	0.0236374	0.790803	-0.0567534	-0.108848	0.0389499	-0.036017	-0.0201219	0.268251	0.22713	0.118773	-0.0549668	-0.0952371	-0.0076561
28	33.6	0	0.0116532	0.0880488	0.0129654	-0.00689466	-0.00257695	-0.0391165	0.156255	-0.048259	0.00485646	0.402393	-0.0430315	-0.115368	0.00723041	-0.0269167	-0.0362702	0.2387	0.201673	0.155266	-0.026488	-0.121793	-0.0193255
29	34.8	0	-0.0153275	0.0499565	0.0186581	-0.0471264	0.00216874	-0.0626456	0.0888718	-0.0294102	-0.0120252	0.171043	-0.0417868	-0.126345	-0.00477945	-0.0220258	-0.0215856	0.195442	0.126613	0.0823902	-0.0333052	-0.101563	-0.016077
30	36	0	-0.0202024	0.0397002	0.0187077	-0.0572487	-0.0297731	-0.0674095	0.0480217	-0.0252947	-0.018401	0.121395	-0.0470047	-0.107314	0.0139764	-0.0338927	-0.0194974	0.184777	0.126782	0.0543296	-0.0562271	-0.105476	-0.0289844
31	37.2	0	-0.0169719	0.0149581	0.035987	-0.0875287	-0.037026	-0.0790589	-0.00588982	-0.0140737	-0.0282696	0.106283	-0.0552791	-0.165361	0.00247852	-0.0426975	0.0246551	0.107599	0.07344	0.0293642	-0.0656651	-0.0751076	-0.0320673
32	38.4	0	-0.0273059	0.00881213	-0.00398572	-0.103798	-0.0399619	-0.0892015	-0.0204284	-0.0109989	-0.0231758	0.0635617	-0.0602592	-0.299005	-0.0139356	-0.031416	-0.0143343	0.0745278	0.0721514	0.0180954	-0.0648774	-0.0720761	-0.0675645
33	39.6	0	-0.0310129	0.00283487	0.0669933	-0.107692	-0.0523823	-0.0955755	-0.0309328	-0.0331307	-0.0295801	-0.000815619	-0.007831	-0.149573	-0.016624	-0.0332313	-0.0548035	0.0450815	0.0718134	0.00406514	-0.0658012	-0.0248417	-0.0900203
34	40.8	0	-0.0382465	0.00170574	0.045723	-0.0446346	-0.0577387	-0.103454	-0.0505571	0.0111332	-0.0278978	0.00952499	-0.0384385	-0.155346	-0.0175395	-0.0291688	-0.0415477	0.0229324	0.0838339	0.045878	-0.0562629	-0.0399214	-0.0917234
35	42	0	-0.0418265	0.0032945	0.0435386	-0.0232976	-0.0745015	-0.104244	-0.0534352	0.0600974	-0.0360585	0.000555292	-0.0315978	-0.0804626	-0.00769246	-0.0318416	-0.0437725	0.0426968	0.0617153	0.0446548	-0.0563989	-0.0626957	-0.0960127
36	43.2	0	-0.0434999	-0.00457584	0.0946374	-0.0549812	-0.0768364	-0.115236	-0.0689754	0.03464	-0.0290341	-0.0589344	-0.0402743	-0.0567497	-0.0011531	-0.0357655	-0.0505533	0.0663816	0.0802214	0.0349614	-0.0674482	-0.0886871	-0.112121
37	44.4	0	-0.0472473	-0.00935133	0.127207	-0.0953282	-0.0429375	-0.123394	-0.0621097	0.0143292	-0.0315025	-0.097189	-0.0385998	-0.0592624	-0.0256877	-0.0345627	-0.0554484	0.0642736	0.0815312	0.0495478	-0.047233	-0.0977813	-0.13699
38	45.6	0	-0.0471778	-0.0205549	0.272842	-0.11823	-0.0230771	-0.0865364	-0.0794572	0.00436203	-0.0264514	-0.116265	0.00899312	-0.067151	-0.0201246	-0.0363637	-0.0527722	0.0691956	0.0722781	0.0508637	-0.0667894	-0.121066	-0.127213
39	46.8	0	-0.0539729	-0.0146088	0.124342	-0.116011	-0.0248445	-0.0481777	-0.0876238	0.00387773	-0.0264821	-0.132409	0.00992267	-0.0878541	-0.0337286	-0.0307269	-0.0780931	0.0824831	0.0083517	0.0339977	-0.0602945	-0.141977	-0.112791
40	48	0	-0.051446	-0.0145838	0.0977347	-0.0687363	0.0128449	-0.0248556	-0.0714009	0.000735684	-0.0446335	-0.0906087	0.0142778	-0.0870444	-0.0327161	-0.0405355	-0.067993	0.0899997	-0.00033097	0.0502706	-0.066152	-0.109373	-0.0798489
41	49.2	0	-0.055962	-0.00222468	0.066985	-0.0518942	-0.00145857	-0.0574303	-0.0783107	0.00980153	-0.0509836	-0.141437	0.0281265	-0.0494906	-0.0399777	-0.0427721	-0.0458097	0.110375	0.0204567	0.019782	-0.0665889	-0.0963198	-0.0561316
42	50.4	0	-0.0497573	-0.0128435	0.0492423	-0.0361138	-0.0525989	-0.0925544	-0.0972574	0.039484	-0.0542198	-0.103042	0.0140932	-0.0297235	-0.0450158	-0.026403	-0.0779833	0.117195	0.0317801	0.0239337	-0.0600581	-0.0561534	-0.0345431
43	51.6	0	-0.0621416	-0.0049091	0.00227234	-0.0459637	-0.0663364	-0.131501	-0.100153	0.0464339	-0.0599155	0.0152249	0.0115717	-0.0184862	-0.0367002	-0.0347225	-0.0702941	0.112673	0.0685811	0.0462487	-0.0647843	-0.0367353	-0.00397392
44	52.8	0	-0.0596075	-0.0129503	0.0374405	-0.0930428	-0.0830487	-0.117707	-0.103325	0.0143779	-0.0772005	0.161123	0.0141645	-0.0313737	-0.0270572	-0.0497922	-0.0773855	0.0914305	0.0534974	0.0431164	-0.0686941	0.00299791	-0.0465674
45	54	0	-0.0392172	-0.0202512	0.0420796	-0.108329	-0.0814133	-0.109689	-0.11831	0.00243669	-0.0627266	0.0483877	0.0270311	-0.00345575	-0.0452939	-0.0381605	-0.0897605	0.0918407	0.0735879	0.0182437	-0.0660375	-0.0190186	-0.0698826
46	55.2	0	-0.0508683	-0.0193894	0.0779373	-0.117085	-0.0737159	-0.110499	-0.12699	0.00140322	-0.0838444	-0.0179968	0.0493988	-0.0239481	-0.0497286	-0.0478803	-0.0747102	0.101093	0.140979	0.0808518	-0.0898688	0.00101821	-0.105987
47	56.4	0	-0.0593559	-0.00198938	0.0818703	-0.134389	-0.0590277	-0.116648	-0.107085	-0.00580095	-0.0777182	-0.0383751	0.0121561	-0.0174136	-0.0750791	-0.0475926	-0.0807951	0.087491	0.114487	0.10035	-0.102637	-0.00907364	-0.117175
48	57.6	0	-0.0618434	-0.0131103	0.0710642	-0.143802	0.00756304	-0.130555	-0.0976735	0.020832	-0.0870048	-0.116266	0.0122544	-0.00397499	-0.0718948	-0.046345	-0.0816095	0.0976785	0.165907	0.0808704	-0.117918	-0.000203641	-0.108061
49	58.8	0	-0.0615894	-0.0143933	0.0820772	-0.141038	0.00213817	-0.128323	-0.116806	0.0132961	-0.0787264	-0.13315	0.00757067	-0.00630948	-0.0608243	-0.0612378	-0.0783837	0.0833798	0.127628	0.110673	-0.10694	-0.0391249	-0.0904224
50	60	0	-0.0566823	-0.00750123	0.0412411	-0.121029	-0.0291716	-0.123525	-0.108742	-0.00483462	-0.0851861	-0.186788	0.00220195	-0.0211528	-0.0856675	-0.0452438	-0.0782422	0.0651797	0.132698	0.0883767	-0.102594	-0.0271848	-0.0623527
51	61.2	0	-0.0568734	-0.0162855	0.0160462	-0.0653019	-0.0507546	-0.0548188	-0.0833497	0.00320624	-0.0884035	-0.0617705	0.0445852	0.0130371	-0.0737794	-0.0469397	-0.0975626	0.0426491	0.141993	0.174449	-0.0993212	-0.0336111	-0.0473874
52	62.4	0	-0.0487584	-0.016354	-0.0220208	-0.0896876	-0.0801368	-0.0334471	-0.0960097	-0.00713443	-0.105838	0.155197	0.0368548	-0.0305418	-0.0638239	-0.0525566	-0.0788056	0.0413423	0.138634	0.159566	-0.0917951	-0.0422105	-0.0594984
53	63.6	0	-0.0648098	-0.0146484	0.0201419	-0.0735308	-0.0801501	-0.048922	-0.10747	0.0212587	-0.0736036	0.0631323	0.0280732	-0.0222597	-0.0745502	-0.0536933	-0.0842144	0.0312311	0.160816	0.113972	-0.0697253	-0.030688	-0.039337
54	64.8	0	-0.0575725	-0.0149007	0.0389437	-0.100775	-0.103825	-0.00954104	-0.0743355	0.0184605	-0.0389626	-0.00066542	0.0129034	-0.0106111	-0.0768668	-0.0689669	-0.0686874	0.00699301	0.157436	0.149224	-0.0758049	-0.0522868	-0.00734071

## Sheet: 20200812_SS48944_FMIn
Responses of FMIn (SS48944) to taste detection in food-deprived animals
Frame	Time (seconds)	Taste stimulus	20200812_Fly1_water	20200812_Fly1_sugar	20200812_Fly1_bitter	20200812_Fly2_water	20200812_Fly2_sugar	20200812_Fly2_bitter	20200812_Fly3_water	20200812_Fly3_sugar	20200812_Fly3_bitter	20200812_Fly4_water	20200812_Fly4_sugar	20200812_Fly4_bitter	20200812_Fly5_water	20200812_Fly5_sugar	20200812_Fly5_bitter
0	0	0	0.174938	0.0677657	0.155488	-0.117576	0.125742	-0.04354	-0.229415	-0.00617364	-0.0145551	0.283016	0.0237203	-0.0119485	0.0397497	-0.087944	-0.0896812
1	1.2	0	0.105667	-0.0438499	0.0318614	-0.116926	0.0626196	-0.0399585	-0.110494	-0.066238	-0.00294306	0.10609	-0.0360327	-0.00615479	0.0224803	-0.110413	-0.05792
2	2.4	0	0.0583144	-0.058743	0.024931	-0.115371	0.012679	-0.0568249	-0.10125	-0.0502375	-0.00657885	0.0789818	-0.0269755	-0.0148789	0.021894	-0.0686604	-0.0345113
3	3.6	0	0.0359975	-0.0530181	0.0146099	-0.0549127	0.0460935	-0.0328103	-0.140637	-0.0269245	-0.0152103	0.0286365	-0.0313599	-0.00860991	0.011395	-0.0878678	-0.0397539
4	4.8	0	-0.0016802	-0.0464626	0.00850359	-0.0581958	0.035517	-0.0389068	-0.0623158	-0.0196169	-0.00572617	0.0117919	-0.0307121	-0.0128954	0.0122453	-0.0504184	-0.0447178
5	6	0	0.00609722	-0.0373011	0.0133047	-0.0787686	-0.0193886	-0.00521426	-0.0733821	0.00491111	-0.0164119	0.04551	-0.0333262	-0.0220227	0.00822105	-0.0414734	-0.0321113
6	7.2	0	0.035348	-0.0441208	0.00530401	-0.0380601	-0.0451011	0.0161529	-0.0751857	0.0103566	-0.00673456	0.0164596	-0.0167819	-0.00165648	-0.00850447	-0.0493721	-0.0136576
7	8.4	0	0.0595502	-0.0532489	0.00653009	-0.0417396	-0.034363	-0.0512324	-0.0516471	0.0215157	0.00182893	0.00613834	0.0103735	-0.00333859	0.00616139	-0.0155424	-0.0288748
8	9.6	0	-0.0031284	-0.0116234	0.00689219	-0.0313922	-0.040656	-0.0140069	0.00860935	0.0155288	0.0104292	0.0147201	0.00351972	0.00178927	0.00224803	-0.0324136	-0.0216324
9	10.8	0	0.0254357	-0.0387892	-0.0066145	-0.0422377	-0.0424639	-0.0488213	-0.0249916	0.00842294	0.00188083	0.00747199	0.00180385	-0.0107869	0.00022005	-0.0312078	-0.0105038
10	12	0	0.0666558	-0.00281972	0.00692053	-0.0398897	0.048006	-0.0141657	0.0260091	0.00885861	-0.0246633	0.0224031	-0.0143259	-0.00386748	0.00583395	-0.00810741	-0.0142828
11	13.2	0	0.0169435	-0.0134634	0.0120502	-0.012832	0.00803192	0.0118235	0.055306	-0.00559698	0.0281842	0.0249979	-0.00228081	0.00375641	-0.0109602	0.00439511	0.00638244
12	14.4	0	-0.00973495	0.00517745	0.0101587	-0.0105755	0.00197456	-0.00070833	-0.00384096	-0.0647048	-0.00019206	0.0252443	-0.0017168	-0.00164502	-0.00862066	0.0140071	0.000426195
13	15.6	0	-0.021852	-0.00773534	0.012587	0.0309969	0.0200218	-0.000237282	-0.0819151	-0.00537865	0.0202043	-0.0124893	-0.0102799	0.000513341	-0.00216177	-0.0320387	-0.0167637
14	16.8	0	-0.0011578	0.0101606	-0.0169673	0.029208	0.00156915	0.0213973	-0.00594637	0.0251822	-0.00578734	-0.038336	-0.00349084	0.000899326	-0.00879494	-0.00465316	0.0129042
15	18	0	-0.0253721	0.0260869	-0.0080415	0.030194	-0.00318051	0.0255621	0.0186837	0.00494048	-0.0415226	-0.0263332	-0.0355132	-0.00243063	-0.00217233	-0.000213638	-0.00613379
16	19.2	0	-0.0220801	0.00506534	-0.00968052	0.0101396	-0.0182338	0.00311723	0.0178673	0.0119123	0.00475096	0.00519609	0.0253965	0.00582642	0.0148331	0.019582	0.0129842
17	20.4	0	-0.0288381	0.0163173	-0.000412671	0.00499637	-0.0157251	0.00203249	-0.0011721	0.016364	0.0171449	-0.00815492	0.040407	0.00773455	0.0118228	0.0382364	0.0149871
18	21.6	0	0.00956645	0.0129606	0.00208574	0.0109222	0.112036	-0.00499965	0.0264884	0.0264667	0.0125408	-0.0044004	0.0234662	0.00713313	0.00869636	0.0443361	0.0077037
19	22.8	0	-0.00431969	-0.00315674	-0.00569335	0.0390573	0.160796	-0.0211122	0.0375753	0.426966	0.00688629	0.0545557	0.0196736	-0.00400132	-0.000408412	0.00127389	0.012299
20	24	1	0.00132036	0.104735	-0.0191238	0.0618663	0.846095	0.0248199	0.134244	0.803397	0.0426554	0.00692113	0.0223422	-0.00717692	0.0897837	0.392305	0.0214182
21	25.2	1	0.039621	0.450301	-0.0342238	0.09239	0.973791	0.0505734	0.141497	0.795777	-0.0149153	-0.0349004	0.459487	-0.00595415	0.0349808	0.443141	0.0245472
22	26.4	1	0.00565397	0.4739	-0.0134808	0.0508481	0.901937	0.026822	0.0689099	0.740057	0.0167981	-0.0463379	0.50928	-0.00799228	-0.00240998	0.400396	0.016842
23	27.6	1	0.0321218	0.397674	-0.0440617	0.0267076	0.706933	0.0138998	0.187905	0.608944	0.0203915	-0.0550791	0.398252	0.00402643	-0.0198115	0.361615	0.0412102
24	28.8	1	0.0142139	0.271799	-0.0327938	0.0297772	0.496297	-0.00468812	0.196247	0.335934	-0.00218766	-0.0832598	0.371292	-0.00511758	-0.0179367	0.320147	0.0185198
25	30	1	0.0766859	0.20061	-0.0447076	0.0438651	0.401605	0.030536	0.132888	0.211217	0.0245678	-0.108788	0.288362	0.0121519	-0.0244537	0.281323	0.0230794
26	31.2	0	0.0284611	0.117693	-0.0382924	0.0444343	0.404034	-0.00287744	0.069913	0.123613	0.0250652	-0.152856	0.163375	0.0104329	-0.0240523	0.302438	-0.00371116
27	32.4	0	0.00673319	0.099536	-0.0416158	0.0474328	0.355995	0.0257939	0.127173	0.0911875	0.0265376	-0.110803	0.0936387	-0.00958009	-0.0173293	0.221177	0.0196629
28	33.6	0	-0.0045506	0.107942	-0.0397295	0.0295231	0.337964	0.0152774	0.101058	0.0573341	0.0277284	-0.115166	0.0630658	0.00604528	-0.000392568	0.191123	0.0295841
29	34.8	0	-0.0352455	0.133701	-0.0447098	0.0411004	0.308783	-0.00965265	0.0932791	0.0560936	0.0467721	-0.173774	0.0716714	0.0145103	-0.00627053	0.183136	0.0294588
30	36	0	0.00233883	0.118887	-0.0402281	0.0477581	0.297929	0.0369788	0.121881	0.0362601	0.01266	-0.118703	0.0548617	0.013302	-0.00450661	0.213372	0.0164043
31	37.2	0	-0.00167691	0.0968218	-0.0458224	0.0431028	0.309522	0.0206098	0.0930144	0.0198347	0.0511728	-0.0828249	0.0747512	0.00416271	-0.0134899	0.221626	0.0271465
32	38.4	0	-0.00141299	0.0772194	-0.0295066	0.0216355	0.270124	0.0162967	0.112249	0.00621617	0.058657	-0.0928853	0.0628573	0.00892565	-0.0112877	0.224438	0.0413723
33	39.6	0	-0.00114283	0.0492357	-0.0346545	0.0202227	0.302514	0.0368458	0.0963744	0.0129011	0.0466211	-0.11908	0.0649635	0.0186407	-0.020947	0.229772	0.0432531
34	40.8	0	-0.0217514	0.0144326	-0.0434757	0.0527691	0.260829	0.0515108	0.182116	-0.00615797	0.0423004	-0.110701	0.0602653	0.00590374	-0.021549	0.225015	0.0457423
35	42	0	-0.00751496	0.0373903	-0.052221	0.0652205	0.301943	-0.000486344	0.1601	0.00992479	0.0463528	-0.139085	0.0669098	0.000275067	-0.0333313	0.206057	0.0221606
36	43.2	0	-0.0144978	0.00924164	-0.0446349	0.0369736	0.328301	0.0120004	0.186503	-0.00493711	0.0268622	-0.124197	0.0621956	-0.00380354	-0.032724	0.235158	0.0360545
37	44.4	0	0.0254834	0.0250867	-0.0458955	0.015608	0.356238	0.0488458	0.200747	0.0234268	0.0913996	-0.11679	0.0544467	0.0038658	-0.0296609	0.260227	0.0499465
38	45.6	0	-0.00909006	0.00836514	-0.0478366	0.0211781	0.352563	0.0134745	0.151539	0.0434365	0.0523995	-0.0906383	0.0606135	-0.00237856	-0.0349685	0.250484	0.0420763
39	46.8	0	-0.0243599	0.0154504	-0.0473312	0.00103225	0.336766	0.0297894	0.129437	0.0208783	0.0961924	-0.107787	0.0733869	0.00160688	-0.035428	0.266898	0.0406373
40	48	0	-0.0247443	0.0199636	-0.0424593	-0.00654024	0.351674	0.052533	0.166878	0.0225741	0.0410511	-0.110324	0.0663257	-0.00722289	-0.0421404	0.29438	0.0467773
41	49.2	0	-0.0082307	0.0218569	-0.0497637	0.0093874	0.329783	0.0523028	0.110582	0.0148856	0.081449	-0.115151	0.089994	-0.00147081	-0.0401124	0.248709	0.0452873
42	50.4	0	0.0004328	-0.0115046	-0.0599611	0.0228553	0.347927	0.0515343	0.181513	0.0333347	0.079156	-0.109933	0.088732	0.00683885	-0.0376355	0.244998	0.0491402
43	51.6	0	-0.0385134	0.0307682	-0.0579043	0.0164008	0.380027	0.0715109	0.139381	0.0402174	0.0524219	-0.151508	0.0965819	0.00511212	-0.0386442	0.276349	0.0570853
44	52.8	0	-0.0921045	0.00518706	-0.0519427	0.010292	0.357574	0.0363479	0.126935	0.0166861	0.0951181	-0.122791	0.0541968	0.00440906	-0.0377147	0.295892	0.0519408
45	54	0	-0.107231	-0.00129998	-0.0520152	0.00350221	0.364588	0.0552109	0.187787	0.0131948	0.0592802	-0.100061	0.0902334	0.00316925	-0.033944	0.290373	0.0341093
46	55.2	0	-0.0990963	-0.0148367	-0.0553312	-0.0177211	0.368362	0.0148707	0.140757	-0.0131983	0.0671244	-0.0944798	0.0823582	-0.00145526	-0.0347097	0.30029	0.0422153
47	56.4	0	-0.0478335	-0.0312707	-0.0585222	-0.0276924	0.359451	0.0294688	0.191572	-0.00513389	0.0661549	-0.0845065	0.100524	-0.00423552	-0.034414	0.274628	0.0278973
48	57.6	0	-0.0358787	-0.0235023	-0.07321	-0.0493121	0.354396	0.0577849	0.225371	-0.00400212	0.100043	-0.0707206	0.087524	-0.0204765	-0.0412637	0.289056	0.0374973
49	58.8	0	-0.0592211	-0.0264218	-0.0581074	-0.0500541	0.374461	0.0327479	0.211975	0.000619953	0.0978552	-0.0765335	0.0990056	-0.0173543	-0.0520003	0.261369	0.0425253
50	60	0	-0.103067	-0.0223531	-0.0787751	-0.0719279	0.339285	0.0497211	0.209242	0.0103037	0.0914328	-0.0905659	0.0952432	-0.0324471	-0.0506325	0.294107	0.0456945
51	61.2	0	-0.11033	0.00780204	-0.0531921	-0.0176296	0.367629	0.058373	0.234004	0.0119015	0.091637	-0.107034	0.102947	-0.036758	-0.0444746	0.271367	0.0471033
52	62.4	0	-0.0618421	-0.000185242	-0.065768	0.0360995	0.349958	0.0263577	0.203831	0.00279637	0.127169	-0.107034	0.102575	-0.0563049	-0.0428639	0.259612	0.0326943
53	63.6	0	-0.0818548	0.0138996	-0.0761528	0.0173563	0.357145	-0.00678017	0.202561	0.0221687	0.111223	-0.135403	0.0901675	-0.0493886	-0.034678	0.303641	0.0295131
54	64.8	0	-0.0738998	0.0227703	-0.080831	0.033223	0.36805	-0.00907628	0.212131	0.0395732	0.11737	-0.122269	0.0925308	-0.0648595	-0.0451559	0.270634	0.0240536

## Sheet: 20201028_SS68204_Phantom
Responses of Phantom (SS68204) to taste detection in food-deprived animals
Frame	Time (seconds)	Taste stimulus	20201028_Fly1_water	20201028_Fly1_sugar	20201028_Fly1_bitter	20201028_Fly2_water	20201028_Fly2_sugar	20201028_Fly2_bitter	20201125_Fly3_water	20201125_Fly3_sugar	20201125_Fly3_bitter	20201125_Fly4_water	20201125_Fly4_sugar	20201125_Fly4_bitter	20201125_Fly5_water	20201125_Fly5_sugar	20201125_Fly5_bitter
0	0	0	0.422006	0.369673	0.256018	-0.098528	-0.0156001	-0.0395121	0.00504071	0.0400699	-0.15513	0.0718124	0.0176628	0.109826	0.355776	0.0923717	-0.0311184
1	1.2	0	0.0655348	0.107113	0.110135	-0.141053	-0.0359561	-0.0295544	-0.0198587	-0.0241885	-0.085998	-0.0202059	0.00272039	0.0448368	0.184678	0.0359381	-0.111933
2	2.4	0	-0.0217989	0.0775167	0.0856969	-0.165849	-0.0565499	-0.0273993	-0.0291035	-0.0107757	-0.0716764	-0.042439	-0.0136371	0.0101966	0.144896	0.0245813	-0.077923
3	3.6	0	-0.037252	0.0421936	0.0694938	-0.0552909	0.0549052	-0.0171672	-0.0340336	-0.0139659	-0.0683013	-0.0468279	-0.0301905	0.0205637	0.114393	0.0153611	-0.0871088
4	4.8	0	-0.0511608	0.0187242	0.0249224	-0.0109808	0.0578264	0.00882824	-0.0492745	-0.0273338	-0.0317564	-0.00461074	-0.00237472	0.0218084	0.100995	-0.0132256	-0.0345189
5	6	0	-0.00174143	0.027854	0.038313	-0.0813741	-0.0256203	0.0207084	-0.0261558	-0.0288136	-0.0669502	0.0140814	-0.0163943	0.0109237	0.0849724	-0.025983	0.0254812
6	7.2	0	-0.0293399	0.0383235	0.0228039	-0.00185161	0.0492455	0.00607985	-0.0100876	-0.0136239	-0.0125212	-0.0182384	0.00364097	0.0119366	0.0599029	-0.0102431	0.0431753
7	8.4	0	0.0114591	0.0121367	0.0151089	0.0306052	-0.0265315	-0.00218497	0.00239069	0.00431609	-0.0399017	-0.0315266	-0.00784389	0.00329864	0.0406296	-0.00762028	0.0151662
8	9.6	0	-0.0364432	0.0123206	0.00728001	0.0218196	-0.0406769	0.0306243	-0.0081068	0.0226217	-0.0518858	-0.0276708	-0.0475965	0.0110711	0.044056	-0.0343674	0.000860025
9	10.8	0	-0.0291717	-0.0238118	-0.0106352	-0.000562319	0.00783945	0.0322894	-0.0132219	-0.000661531	0.0231925	0.00210282	-0.00213528	0.0188566	0.0637107	0.0200705	-0.00702604
10	12	0	-0.0416329	0.0155214	-0.00716112	0.0335125	0.0650571	0.0249432	-0.00988749	-0.0100466	-0.0291886	-0.00500905	0.0247195	0.00154445	0.0184902	-0.0219955	0.0380781
11	13.2	0	-0.0235515	0.033933	0.00552005	0.0486536	0.000891823	-0.0126835	0.0295988	0.0193283	-0.0196539	-0.0195065	0.00379029	0.00661927	0.0315991	0.00963828	0.0406849
12	14.4	0	-0.0320499	0.000874269	0.0106475	-0.00791931	0.0437003	-0.0198082	0.0202548	0.0016007	-0.0270879	0.00193821	-0.0272595	0.0311271	0.023179	-0.0385961	-0.00231909
13	15.6	0	-0.0366053	-0.0144554	0.0242276	-0.0235442	0.0453017	-0.0327101	0.0226627	-0.0103774	0.0143519	0.0158121	-0.00337518	0.00150113	-0.0299271	-0.0389358	-0.00640871
14	16.8	0	-0.00680883	-0.020062	0.0189236	-0.0108554	-0.0296186	-0.00593944	-0.00408974	0.0124946	-0.0296199	0.00285144	-0.00249243	-0.0124569	0.00463258	-0.0495766	-0.0157935
15	18	0	0.0422422	-0.00304042	-0.00675169	0.0196934	-0.0373788	0.00564834	-0.00171044	-0.00644323	0.0249682	-0.0161106	0.0213282	-0.0221218	-0.0277688	0.0291643	-0.0312767
16	19.2	0	0.0671001	-0.007678	-0.00105945	-0.0228154	-0.0405558	0.0018288	-0.0118531	0.00189614	0.0233623	0.0178628	-0.00557237	-0.0105605	-0.0264652	0.0566602	-0.0109098
17	20.4	0	0.0604777	0.018719	-0.0337112	-0.0361629	-0.0552371	0.00643148	-0.0317535	-0.00779094	0.0196754	5.86676e-05	-0.00900323	-0.0145093	-0.0574505	0.0335707	-0.00502903
18	21.6	0	0.0316833	0.0305504	-0.0428922	-0.0115734	-0.039955	-0.0176159	-0.0240607	-0.00586839	0.0222789	0.0398567	-0.00574283	-0.00147191	-0.0453735	0.0155423	-0.0242196
19	22.8	0	-0.00579763	0.0297309	-0.0721433	0.097704	-0.0127793	0.00321354	0.0490148	-0.00384612	-0.00214361	0.120903	0.263115	0.00950446	0.26594	0.142718	-0.00790473
20	24	1	0.0548375	0.414714	-0.0484143	0.291255	0.285179	-0.00821218	0.145138	0.249655	0.0343478	0.331228	0.404254	-0.0339504	0.283962	0.346798	0.0185938
21	25.2	1	0.335531	0.267755	-0.0608041	0.184595	0.206853	-0.0058685	0.097191	0.258449	0.0763463	0.353035	0.345983	-0.0155208	0.238347	0.197372	0.0394676
22	26.4	1	0.470652	0.133227	-0.0410525	0.163335	0.158526	0.0193065	0.0991567	0.202608	0.0286877	0.336235	0.310001	-0.0313275	0.249227	0.0919554	0.00315719
23	27.6	1	0.469264	0.131206	-0.0464839	0.10344	0.0949654	0.0520689	0.0503819	0.101557	0.0517061	0.20584	0.208542	-0.0388533	0.137566	0.0679128	0.0155601
24	28.8	1	0.358009	0.0620408	-0.0064588	0.0282567	0.109436	0.0758999	0.0598268	0.112463	0.0328691	0.139235	0.158149	-0.0407559	0.0408654	0.0516634	0.0113688
25	30	1	0.30724	0.0373255	-0.00928661	0.00122551	0.121828	0.0540088	0.00237724	0.114294	0.038704	0.17413	0.140034	-0.0416091	0.00896166	0.045025	-0.00437983
26	31.2	0	0.279243	0.0228683	-0.0143851	-0.0394628	0.102237	0.0256014	-0.00370468	0.11385	0.0785226	0.0766757	0.100574	-0.0401857	-0.0703151	-0.0101908	-0.0114339
27	32.4	0	0.218665	-0.00794483	-0.0114101	0.00931241	0.0720725	0.00598985	-0.0205145	0.0539364	0.0777357	0.00698	0.0358808	-0.0369804	-0.0771027	0.00678398	0.00373495
28	33.6	0	0.130164	0.00205754	-0.0229416	0.104822	0.0344011	0.0199831	-0.0259843	0.0358852	0.0737253	-0.024582	0.0288083	-0.0517704	-0.0841838	-0.0159721	-0.00743845
29	34.8	0	0.127574	0.00483239	-0.02077	0.1086	0.0445158	0.0354621	-0.0238909	0.020786	0.0430505	-0.0212745	0.0290529	-0.0668646	-0.105612	-0.00589026	-0.0152388
30	36	0	0.0857199	0.0106456	-0.0301598	0.132673	0.0397455	0.0164396	-0.0577929	0.038774	0.0684064	0.017883	0.0459816	-0.0587265	-0.103744	-0.0376199	0.0111892
31	37.2	0	0.0786822	-0.0251827	-0.0179206	0.168789	0.0456331	0.0373561	-0.0528359	0.0283579	0.110611	0.00919603	0.0437007	-0.0684373	-0.131559	-0.0623516	0.00255403
32	38.4	0	0.0838322	-0.0429112	-0.0172399	0.175497	0.0366831	0.0511035	-0.0732643	0.0589551	0.124327	0.0176762	0.00357933	-0.0712902	-0.125419	-0.0490865	-0.00518087
33	39.6	0	0.0582269	-0.0610392	-0.0154433	0.173072	0.0468138	0.0370168	-0.0500581	0.0140803	0.129809	0.000345945	-0.00570544	-0.0734215	-0.120509	-0.0674245	-0.0198631
34	40.8	0	0.0915006	-0.0448393	-0.00555695	0.127483	0.0198768	-0.00377684	-0.0451566	0.0156791	0.111697	-0.00519354	0.0200416	-0.0656345	-0.142985	-0.0572854	-0.00504332
35	42	0	0.0878217	-0.0700272	-0.00565346	0.100614	0.0328914	-0.0106358	-0.0400583	0.0418977	0.112783	-0.0145324	0.0441442	-0.0959924	-0.135565	-0.0689905	-0.0219795
36	43.2	0	0.0467883	-0.0391608	-0.00394701	0.135597	0.0214766	-0.00941522	-0.0225507	0.065873	0.0861559	0.0175489	0.0106124	-0.104119	-0.133944	-0.0580744	-0.0208306
37	44.4	0	0.072902	-0.016385	0.00915032	0.112509	0.00543646	-0.0116059	-0.0345448	0.0494528	0.137478	0.0394123	0.0032678	-0.0978996	-0.115337	-0.0602109	-0.0231744
38	45.6	0	0.0611642	-0.026716	0.00452042	0.0898044	0.0366477	-0.0251895	-0.0628071	0.11801	0.116843	0.00714485	0.0254028	-0.102262	-0.113185	-0.0672414	-0.015986
39	46.8	0	0.0648132	-0.0346529	-0.0336865	0.0814885	0.0343057	-0.0137307	-0.0467675	0.0896927	0.137175	0.00660981	0.0253	-0.108132	-0.102287	-0.046138	-0.0284671
40	48	0	0.0562879	0.00282541	-0.0600318	0.0483683	0.110151	-0.0321756	-0.0515832	0.106431	0.156803	0.0245165	-0.0202533	-0.080447	-0.105302	-0.0575222	-0.00733483
41	49.2	0	0.0776741	0.0356331	-0.0982588	0.0348211	0.184351	-0.036588	-0.0664408	0.114609	0.156918	0.0719413	-0.0113415	-0.089609	-0.108984	-0.0321375	-0.0268816
42	50.4	0	0.00946163	0.00679562	-0.102375	0.0242986	0.173608	-0.0299619	-0.0464547	0.111392	0.18214	0.0453608	0.00718665	-0.0900671	-0.130962	-0.0358259	-0.0235957
43	51.6	0	0.00434851	0.0113003	-0.111596	0.113402	0.153881	-0.0344647	-0.0311414	0.105953	0.18103	-0.00301411	-0.00488233	-0.0997528	-0.139833	-0.0319456	-0.0438956
44	52.8	0	0.02889	-0.0220908	-0.110854	0.175851	0.166351	-0.0499098	-0.0104861	0.0656533	0.189202	-0.0168233	0.0347697	-0.0943774	-0.177343	-0.0373467	-0.0266523
45	54	0							-0.0393605	0.065932	0.191364	-0.0140882	0.0381768	-0.100401	-0.18442	-0.0349497	-0.0386941
46	55.2	0							-0.0684048	0.0536938	0.189714	0.0292747	0.0650731	-0.105832	-0.163694	-0.0457772	-0.0295786
47	56.4	0							-0.0510401	0.0565235	0.178859	-0.0341681	0.00242622	-0.106538	-0.16853	-0.0351082	-0.0144322
48	57.6	0							-0.0490761	0.0573914	0.130384	-0.0316027	0.00945906	-0.0937159	-0.162852	-0.0131038	-0.0163961
49	58.8	0							-0.0491737	0.0562187	0.190743	-0.00354624	0.0162048	-0.106943	-0.160309	-0.0309196	-0.0282385
50	60	0							-0.0566966	0.0605052	0.164539	0.0439971	0.0222946	-0.0955954	-0.167723	0.00136927	-0.0237072
51	61.2	0							-0.0537893	0.0491648	0.173614	-0.0010245	0.0059877	-0.0995174	-0.159036	0.0145617	-0.0162859
52	62.4	0							-0.0342185	0.0767653	0.136548	0.057952	0.00218033	-0.0926727	-0.157265	0.013545	-0.00989668
53	63.6	0							-0.0484489	0.0640834	0.152493	0.0240775	0.00567617	-0.0991993	-0.199092	0.0123225	-0.0246667
54	64.8	0							-0.0500144	0.0544927	0.173639	0.0874063	-0.0155548	-0.106615	-0.16737	0.019954	-0.0184078

## Sheet: 20211103_SS31386_Bract
Responses of Bract (SS31386) to taste detection in food-deprived animals
Frame	Time (seconds)	Taste stimulus	20211103_Fly1_water	20211103_Fly1_sugar	20211103_Fly1_bitter	20211103_Fly2_water	20211103_Fly2_sugar	20211103_Fly2_bitter	20211103_Fly3_water	20211103_Fly3_sugar	20211103_Fly3_bitter	20211103_Fly4_water	20211103_Fly4_sugar	20211103_Fly4_bitter	20211103_Fly5_water	20211103_Fly5_sugar	20211103_Fly5_bitter	20211103_Fly6_water	20211103_Fly6_sugar	20211103_Fly6_bitter	20211103_Fly7_water	20211103_Fly7_sugar	20211103_Fly7_bitter	20211103_Fly8_water	20211103_Fly8_sugar	20211103_Fly8_bitter
0	0	0	0.0520281	-0.0294771	0.0552711	-0.0830486	-0.0319456	0.00348518	-0.0506488	0.0326292	-0.0175744	0.0920705	-0.0377927	0.026937	-0.0348571	0.150811	0.0214565	0.0177216	-0.0301798	-0.0589359	-0.0117433	-0.0554846	-0.0242831	-0.0852795	0.023941	0.0428772
1	0.67	0	0.0258686	0.0300885	-0.0341187	-0.0958372	-0.0751408	-0.00782441	-0.0158965	0.0147264	0.0134482	-0.118258	-0.168261	-0.0238177	-0.0596775	0.110361	0.0925212	0.00333918	-0.00281221	0.0119965	-0.00628866	-0.00496743	-0.00978431	-0.0360394	-0.0222514	-0.0802493
2	1.34	0	-0.00584487	-0.00907771	-0.0239328	-0.0161497	-0.0147281	-0.00455747	-0.0223319	-0.0257536	0.00736995	-0.0209417	-0.184385	-0.00852237	0.0676111	0.119357	0.107086	0.0223397	-0.00950984	-0.00897046	-0.0615194	0.0363406	0.061705	-0.00773669	0.00378064	0.0338296
3	2.01	0	-0.0384371	-0.027854	9.06576e-05	-0.0471219	-0.0235586	-0.0153963	-0.0886708	-0.120377	-0.0358478	0.0132741	-0.131559	-0.214958	0.0344794	0.0509868	0.0406807	-0.0133716	-0.0525736	-0.0105753	-0.0186727	-0.0363318	0.0310873	-0.0168456	-0.0125026	0.0164513
4	2.68	0	0.0555452	0.0840555	-0.0383838	0.0116812	-0.025772	-0.014718	0.0610975	-0.0605725	0.0377345	-0.0777056	-0.0776112	0.0226418	-0.0527977	-0.00100264	0.0149593	-0.00237215	-0.0825145	-0.00385702	-0.0747944	-0.0123448	-0.0294089	-0.0373237	-0.0476927	-0.0460773
5	3.35	0	-0.0281776	0.0645738	-0.0100242	-0.0190868	-0.0328256	-0.00684163	-0.0244128	-0.022644	0.0240495	-0.0181483	-0.0567752	-0.0190558	-0.0550226	0.0137767	0.022632	0.052687	-0.0697542	0.0332358	-0.00531147	-0.0226832	0.00802679	0.0210863	0.00635193	-0.0291103
6	4.02	0	0.00167752	0.0816141	0.0674874	-0.0449344	0.0100274	0.0283006	-0.0155855	-0.00128212	-0.0349034	-0.0719422	0.0816955	-0.107476	-0.0321708	0.00352846	-0.0655513	0.0978647	-0.12787	0.0888124	0.0163219	0.0440662	0.0270917	0.00286337	-0.0439562	-0.0309204
7	4.69	0	-0.0820605	0.0112442	-0.0527839	-0.019886	0.0210186	0.0211315	0.0395019	0.0221502	0.0838648	0.03937	0.155437	0.00883988	-0.0897324	-0.0306015	0.0189629	0.0564141	-0.0174496	-0.0226962	0.0477645	0.0157478	0.0733686	0.0299771	-0.0414922	-0.0588815
8	5.36	0	-0.018617	0.0142466	-0.0390777	0.0405359	-0.0152106	0.000188869	0.0535304	0.0501201	0.0142121	0.110156	0.132576	0.112174	0.052492	0.027912	-0.107303	-0.00323947	-0.0403299	0.0527467	0.0796756	0.110712	0.0356118	-0.0274894	-0.00648684	-0.0197194
9	6.03	0	0.0641025	-0.0549503	-0.0135384	-0.0058985	0.00263032	0.0124142	-0.00132041	0.0376572	-0.0528418	0.042113	0.10446	-0.0601754	-0.0263149	0.0898388	-0.0600913	-0.0451506	0.0528186	0.00140058	-0.0147701	-0.0181381	-0.0188324	0.0529625	-0.00902536	0.0289897
10	6.7	0	-0.0167476	-0.0802534	0.0784885	0.0356323	0.0146868	0.0104336	-0.00139508	-0.00117824	0.00418186	-0.0639715	0.137463	-0.0496374	-0.0167704	-0.0236566	-0.00651805	-0.0460821	0.0185037	0.0259383	0.0512877	-0.00313831	-0.0210469	0.0836382	0.0109624	0.0897956
11	7.37	0	0.00677773	0.0331355	0.0391926	0.0209437	-0.0249636	0.0293729	0.018048	0.12598	-0.0813883	0.190731	0.11362	-0.046348	-0.0164476	-0.0269763	-0.0327179	-0.0178219	0.0391378	0.000265615	-0.00611415	-0.0458568	-0.0290097	-0.0107597	-0.0243207	0.043824
12	8.04	0	-0.0448084	-0.00251038	0.0152047	0.013479	-0.0389953	-0.0239106	-0.0029317	0.0170992	-0.0158546	0.035414	0.00673487	-0.0259236	0.0926113	0.00596916	0.00308779	0.0181619	0.103785	-0.0232582	-0.061714	-0.0458761	0.0513845	0.0228411	0.0318484	0.00975018
13	8.71	0	-0.0293794	-0.0420671	-0.0240414	0.0894601	0.0563935	-0.00869621	-0.0446482	0.00333587	-0.0117255	-0.11148	0.0445828	-0.0885379	-0.012696	-0.0787355	-0.0312332	-0.0302003	0.0476819	0.0235159	0.0364314	0.0220595	-0.00356338	0.0123455	0.0757979	0.0536475
14	9.38	0	-0.0257379	-0.000233759	-0.000164059	0.0588335	0.0139513	-0.0345895	-0.0209854	0.053156	-0.00387126	0.0200441	0.0416795	-0.0110512	-0.00564084	-0.0910033	-0.0329151	0.0199376	0.060209	-0.0547894	0.00695273	-0.0239566	-0.0454441	2.62832e-05	0.00489118	0.00417297
15	10.05	0	0.0358307	-0.0415291	0.0115281	0.0106045	0.0166983	0.00615145	-0.0107406	0.0273005	0.0205381	0.0201126	-0.112737	0.0621619	0.0101984	-0.0443511	-0.0363358	-0.0219656	0.0236464	0.00708798	-0.000808106	-0.0277679	-0.0419227	-0.0112263	0.0248866	0.0206484
16	10.72	0	-0.00429404	-0.0492852	-0.0565169	0.028962	0.053193	-0.0148743	0.0522036	-0.120502	0.00871655	-0.0921461	-0.0637371	0.219999	-0.00028704	-0.107048	-0.0264334	-0.0206043	0.0554497	-0.0359253	-0.0136734	-0.00615316	-0.0780467	0.00665393	0.0222322	-0.0950171
17	11.39	0	-0.0613113	0.0146382	0.05128	-0.02649	0.0413827	-0.0180297	0.0654803	-0.0714356	0.00168453	-0.00239336	-0.0138173	0.127788	0.0523245	-0.0669727	-0.0121351	-0.0591512	-0.0202363	-0.0126907	0.00829474	0.0938663	-0.0372174	0.0053607	-0.00508664	0.0414429
18	12.06	0	0.113586	0.0036417	-0.0259612	0.0483208	0.0531582	0.0379598	0.00970594	0.0395909	0.0382072	0.013702	0.0284286	0.0749625	0.0926983	-0.102194	0.0898483	-0.0285068	0.0519984	-0.0133014	0.0286812	-0.0200938	0.0502837	-0.00505464	0.00812247	-0.025454
19	12.73	0	-0.00195082	0.0181628	-0.00144213	0.0222021	0.0320537	-0.036479	-0.0424937	0.0569764	-0.0315664	0.108932	0.0183641	0.037233	0.00998154	-0.109442	-0.0258032	-0.0405525	0.0165713	-0.00731023	0.0483311	-0.0186107	0.0263806	-0.00674351	-0.0124617	-0.0114654
20	13.4	0	-0.0257292	-0.0192975	0.0898819	-0.0263157	0.0340695	-0.00312736	0.000619201	0.0630931	0.0311909	0.0258939	-0.0912281	0.00521875	0.0140714	-0.0333925	0.0395562	0.0369662	0.0151674	0.0210556	0.0202093	-0.00721388	-0.0327621	-0.00296789	-0.0126142	-0.0612157
21	14.07	0	-0.0104138	-0.0936014	-0.0293132	0.0135026	-0.0258698	-0.00417457	0.0321182	0.0305079	0.040283	-0.0223355	-0.0211518	0.0365249	0.0183551	-0.0519759	0.021247	-0.0140806	0.0665624	-0.0127058	0.0940821	0.0837717	-0.0260652	0.00675256	0.00807539	-0.0548453
22	14.74	0	0.0420411	-0.0698376	-0.0623464	0.0208224	-0.0351307	0.037958	0.0449883	0.00847154	0.00489226	-0.0207624	0.103664	0.00614726	0.0446723	-0.0355908	-0.0464325	0.023204	0.0845325	0.0248282	0.0221807	0.0371638	0.0330664	0.00803917	-0.0376405	-0.0390618
23	15.41	0	-0.00231169	0.0491138	-0.0668731	0.00262258	0.0123695	-0.00800411	0.0511002	0.000970564	0.0190725	-0.118404	0.0125486	0.0179262	0.0199737	0.0433269	-0.0171121	0.0131713	-0.0143426	-0.020124	0.0579311	0.136587	-0.0274074	0.020094	-0.0281059	0.0394954
24	16.08	0	0.0139397	-0.0694345	0.00346289	0.000297136	-0.0129372	0.0303639	0.0317987	0.00268397	-0.0460663	0.0498864	-0.0876048	-0.0675778	-0.0642654	0.0398089	0.0333698	0.00943652	-0.0251342	0.00718197	0.062634	-0.0021859	-0.00072899	-0.0119705	-0.0439454	0.0536539
25	16.75	0	-0.0116608	-0.108631	0.00825595	0.0227989	-0.0222836	-0.0548705	0.0240526	0.0289107	-0.0372893	-0.112526	-0.0141912	-0.0160223	0.0225704	0.0272613	0.0534972	0.0263228	-0.0568419	0.0282258	0.0759183	0.132038	-0.0735354	-0.0109488	0.0106561	-0.024402
26	17.42	0	0.0508294	-0.0236512	-0.0236776	0.0507917	0.0423538	-0.0507462	0.0354086	0.0697428	0.0215523	-0.116437	-0.0447501	-0.0632063	0.0461691	-0.0115548	-0.0107043	0.060867	-0.0334859	0.0175851	0.0477345	0.0072833	-0.0492305	-0.0181501	-0.0650262	-0.00981474
27	18.09	0	0.00106551	-0.0525969	0.0386745	-0.0156836	-0.0154017	0.0247786	-0.0108539	0.110805	0.00848239	0.0826563	-0.124048	-0.0314778	0.153969	0.0142143	0.056611	0.0212264	0.00805461	0.0564151	0.0383187	0.0271428	-0.0387682	-0.0103663	-0.0778071	0.00488305
28	18.76	0	-0.00349019	-0.162519	-0.0663637	-0.0212422	0.00203848	0.0340801	0.0105924	-0.0189306	0.0407474	-0.0481283	0.00049611	0.196301	0.104352	0.0225159	0.000202919	0.00405929	-0.0853089	0.0272824	0.0601074	0.00182986	0.0163352	-0.0276665	-0.0112729	-0.0169104
29	19.43	0	-0.0241773	-0.0794986	0.00054191	-0.0883841	-0.00423617	-0.0471685	-0.00891748	0.0496882	0.0253971	-0.0735453	0.0319148	-0.0274017	0.0371431	-0.0492122	0.061593	-0.0405062	-0.0619686	0.0438562	0.0472787	-0.000845062	-0.0364771	0.0119068	-0.0639715	-0.0459946
30	20.1	1	0.0110896	-0.0308569	0.0731226	0.0258429	-0.0433417	0.00977373	-0.00978741	0.128349	-0.0124005	0.0559642	-0.0275217	0.111129	0.186755	-0.0705278	0.0515068	0.00408724	-0.036139	0.0321231	-0.0119084	0.0249973	-0.0126743	0.0301481	-0.0307864	-0.00253099
31	20.77	1	0.0854201	-0.108747	-0.0283707	-0.0206503	0.165779	-0.0373953	-0.0327705	0.390206	0.00574075	-0.0785968	-0.0887922	0.0755484	0.0850894	0.00873559	0.001744	-0.0778505	-0.00666857	0.0685013	0.0225655	0.0777168	0.0487518	0.0799432	-0.0322659	0.0104802
32	21.44	1	-0.0121091	-0.0259272	0.0104076	0.0337704	0.352018	-0.0248231	-0.0106252	0.555087	0.0151252	-0.0287691	0.398978	0.168879	0.0908096	0.304442	0.0545636	-0.0243076	0.0434258	0.0142025	-0.00219252	0.328699	0.0337569	0.115942	0.231577	0.022895
33	22.11	1	0.0492671	0.172973	0.0162834	0.0159789	0.341751	-0.0373678	0.0774964	0.540381	0.000856375	-0.00901577	0.466353	0.125898	0.13469	0.501641	0.0493537	0.0446063	0.404745	0.0227314	0.0358026	0.412836	0.0718212	0.0535951	0.386199	0.00256963
34	22.78	1	0.0405642	0.35407	0.0567708	0.0339903	0.365509	-0.0346443	0.119592	0.450168	0.09638	0.0250457	0.629408	0.0514229	0.0931995	0.561067	0.108591	0.0512642	0.698335	0.0657364	0.0575945	0.365843	-0.0275441	0.00632142	0.392605	-0.0202357
35	23.45	1	0.0315694	0.318324	-0.0361257	0.0650298	0.488986	0.00129835	0.0409571	0.525408	0.00790257	0.0702426	0.523395	-0.0200722	0.151969	0.47445	-0.0265866	0.00911985	0.950606	0.0412058	0.0636303	0.453596	0.0270338	0.049968	0.331984	-0.0375265
36	24.12	1	0.0464422	0.330942	-0.0577014	0.0484786	0.367082	-0.0312394	0.0319881	0.422292	-0.00873308	0.0452937	1.09792	0.0021255	0.0953196	0.502852	-0.00916095	0.024736	1.07769	0.00706077	0.0115262	0.523018	0.0013721	0.0236102	0.281999	-0.0144398
37	24.79	1	0.0304673	0.318216	-0.0143784	0.0801956	0.336905	-0.0146049	0.0581819	0.438753	0.0611594	0.0164408	1.34887	0.120629	0.218982	0.479634	0.0249044	0.112139	1.05334	0.0676328	0.0406592	0.466666	0.0985872	0.0258128	0.253618	-0.0240777
38	25.46	1	0.0462777	0.233152	0.0239448	0.0724197	0.253444	0.0710995	0.0414561	0.369776	0.0593749	-0.0068989	1.44788	-0.0781413	0.0291937	0.515758	0.0400717	-0.0270334	0.818804	0.0376099	0.0591159	0.551214	0.126593	-0.0123876	0.20099	-0.0767624
39	26.13	1	0.0426797	0.210222	0.0110782	0.0494516	0.224902	-0.00663449	0.0131243	0.372287	0.0233739	0.0289178	1.57606	0.00223621	0.0882973	0.495754	-0.0115343	0.00577788	0.616179	0.0290413	0.0343594	0.520157	0.0323719	0.0182878	0.195332	-0.0634286
40	26.8	1	0.036865	0.140649	-0.0460488	0.112121	0.275017	0.0149383	0.051522	0.36458	0.0592957	-0.0530435	1.58212	0.00172551	0.174508	0.399704	-0.0258742	0.00793375	0.527073	0.10701	0.0522171	0.324961	0.040246	0.0404937	0.11541	-0.125903
41	27.47	0	-0.0191723	0.138224	0.0366726	0.0781423	0.299767	0.0112435	-0.0273841	0.31234	0.0769426	0.0276919	1.19185	-0.00232081	0.197727	0.37083	-0.00655476	0.0417636	0.414595	0.0733331	0.099861	0.339926	0.0767876	-0.0369763	0.101163	-0.0717484
42	28.14	0	0.0556658	0.142726	0.0238746	0.0599914	0.234911	0.0196401	0.00483425	0.36852	0.0997295	0.12075	1.42316	0.148111	0.0571098	0.44785	-0.0404646	0.0598457	0.401901	0.068616	0.131241	0.29853	0.0546202	0.116701	0.10447	0.0603037
43	28.81	0	-0.0580666	0.101992	-0.00447369	0.071347	0.336229	-0.00503203	0.0111486	0.383028	0.0773713	0.0359377	1.62432	0.104505	-0.0242529	0.404264	0.0026092	0.102509	0.257684	0.0586083	0.0931219	0.260092	0.0962193	0.125852	0.15285	0.110596
44	29.48	0	0.00834578	0.043456	0.0131479	0.0574324	0.423002	0.0252921	-0.00362272	0.44825	0.0918219	-0.0352044	1.57928	0.231277	0.0464963	0.327024	0.0895525	0.0635732	0.188121	-0.0143589	0.0382748	0.228252	0.0848713	0.11628	0.137734	0.0616877
45	30.15	0	0.0520677	0.0730754	-0.0555992	0.0814428	0.290751	0.0454684	0.0277349	0.397992	0.0751945	0.218988	1.21025	0.0100994	0.0822452	0.365469	0.0191221	0.11646	0.0874656	-0.0270896	0.0793031	0.0405917	0.0732585	0.114196	0.0779191	0.0908267
46	30.82	0	-0.0720804	0.140289	-0.0147059	0.0990091	0.339608	0.0633648	0.0366642	0.312788	0.057655	0.150878	0.966966	-0.0224782	-0.0238886	0.310267	-0.0393378	0.0372117	0.0382391	-0.0542303	0.0367073	0.106345	0.0602783	0.0666137	0.0650217	0.0593869
47	31.49	0	-0.0135993	0.0931723	-0.0192337	-0.00589507	0.227691	0.0823013	-0.00544331	0.237576	0.0815582	0.0571101	0.657779	0.122636	0.207967	0.244731	-0.0605538	0.117097	0.0761376	-0.0387091	0.0381658	0.110752	-0.0361202	0.103985	0.0892173	0.0928927
48	32.16	0	-0.0379758	0.14261	0.0478336	0.0926904	0.288047	0.0446652	0.0202043	0.136656	0.052722	-0.0785055	0.465814	0.116634	0.0427331	0.236965	0.031623	0.0911839	0.118234	-0.0275575	0.00297974	0.08865	0.0223974	0.100854	0.0661316	0.0610613
49	32.83	0	0.0168158	0.0188143	-0.00346749	0.137302	0.215826	0.042601	-0.0285531	0.240308	0.0741449	0.120712	0.28767	0.0674528	0.0311938	0.121242	0.105236	0.0633641	0.0937889	-0.0985672	0.0100816	0.110113	0.00729795	0.12832	0.10365	0.142402
50	33.5	0	-0.0741215	0.0984524	-0.0153832	0.0453847	0.233961	-0.0200674	0.0327951	0.138279	0.0609274	0.196235	0.2862	0.063675	-0.00344009	0.211786	0.0925845	0.100565	0.0394212	-0.0477052	-0.0669293	0.128917	0.0944349	0.112924	0.101749	0.085288
51	34.17	0	0.0402762	0.135134	0.00832456	0.0438332	0.309235	0.0204793	0.037067	0.187859	0.046088	0.155299	0.208437	0.00460709	0.0476517	0.147851	0.0858535	0.0346712	0.0338703	0.00712144	0.0359843	0.078018	0.0211237	0.123146	0.130396	0.0930169
52	34.84	0	0.00749658	0.108879	0.0274873	0.0828541	0.253252	-0.0152457	0.041573	0.131388	0.0548954	0.274744	0.15977	-0.03192	0.0220721	0.140884	0.0206194	0.0614193	-0.0253195	-0.0193153	-0.00965673	0.187085	0.0323505	0.0831545	0.134125	0.0957706
53	35.51	0	0.0404928	0.0591285	-0.0190246	-0.0399297	0.244718	0.0325449	0.0393937	0.146718	0.0555691	0.221858	0.155814	0.0977412	-0.00322644	0.22224	0.0445202	0.0699716	-0.0365196	-0.00247773	0.0362135	0.141971	0.0308566	0.128154	0.0754014	0.0992125
54	36.18	0	0.000861175	0.0981825	-0.124791	0.0947978	0.153112	0.0399932	0.0069008	0.226638	0.0480784	0.248923	0.0296013	0.121444	0.0345523	0.173074	0.122833	0.0342827	0.0329479	0.0617341	0.0226103	0.0886212	0.0561763	0.0882027	0.0632759	0.127971
55	36.85	0	0.0668646	0.101293	-0.0365334	0.0774317	0.148658	0.0461384	0.0178044	0.154462	0.0815481	0.151344	-0.0502692	-0.0372844	0.111327	0.127498	0.0710831	0.000185529	-0.00496754	0.0448849	0.00236905	0.0141299	0.0451357	0.10677	0.0900929	0.057368
56	37.52	0	0.0783351	0.0950815	0.0584631	0.0887132	0.234791	0.00601452	0.031127	0.149829	0.0417109	0.205937	0.0058712	0.208584	0.02975	0.227179	0.00577397	0.0390981	0.00817218	0.0289748	-0.0500359	-0.00340203	0.0689525	0.126166	0.0290839	0.104241
57	38.19	0	0.0551967	0.0436279	0.0148342	0.0396297	0.261919	-0.0185539	0.00457035	0.107327	0.0680064	0.214818	-0.0983902	0.232021	0.0641234	0.226138	0.0212561	0.00757683	0.0292358	-0.0472669	0.0856068	0.0634	0.0767819	0.141486	0.0173566	0.0918874
58	38.86	0	0.0196458	0.132745	0.0546344	0.0262662	0.182716	0.00925054	0.0819875	0.0901521	0.0630779	0.195027	0.0908096	0.167481	0.121497	0.247217	0.0246436	-0.00516158	0.0249459	0.00965694	0.0864169	0.00684131	0.0479378	0.116513	0.000491447	0.176872
59	39.53	0	0.114735	0.0221162	0.019836	0.0411576	0.155199	-0.017607	-0.0123984	0.0776904	0.0638819	0.223339	-0.076306	0.107381	0.0589316	0.338571	-0.0107521	0.0140397	0.0261546	-0.0106921	0.0447703	0.00174099	0.0577793	0.0905885	-0.0240765	0.044185
60	40.2	0	0.145595	-0.108897	0.0107109	0.0954111	0.179214	0.0441682	-0.00477968	0.153665	0.00256333	0.196693	-0.0284759	0.278951	0.0572415	0.263371	-0.0566473	-0.00426768	0.0613643	-0.0150875	0.0979745	0.00844109	0.0372134	0.0893713	-0.00874732	0.108642
61	40.87	0	0.103174	-0.0299299	-0.0180578	-0.0192202	0.152573	-0.00132985	0.00308652	0.119146	0.0328599	0.212253	-0.0723345	0.249436	0.106511	0.334834	-0.0917504	-0.0823407	-0.0560647	-0.0605774	0.0418918	0.0251449	0.0638237	0.112872	-0.00409778	0.0117167
62	41.54	0	0.149879	0.00210768	-0.0330614	0.00151492	0.178138	0.0328605	0.0617336	0.225643	0.0459865	0.406534	-0.165018	-0.0424113	0.0860892	0.34607	-0.0322837	-0.0761135	0.00911702	-0.00947987	0.0627632	0.0485559	0.0422516	0.121801	-0.00894051	0.101455
63	42.21	0	0.183394	-0.0166453	-0.0259058	0.0666652	0.182486	0.032627	0.00922242	0.112596	0.0391921	0.305945	0.0221232	0.0910394	-0.0382502	0.284074	-0.0348843	-0.0907399	0.0191026	0.0240984	-0.00383511	0.0567026	0.0938877	0.0867313	0.00675237	0.0974503
64	42.88	0	0.064863	0.0952898	0.0286296	0.0180166	0.301967	0.108936	0.0546467	0.116029	0.0540119	0.257397	0.0180552	0.159551	0.0866916	0.301808	0.00144689	-0.111308	0.0447848	0.00213367	0.0804091	0.0454754	0.0887765	0.110175	0.0287454	0.147658
65	43.55	0	0.103547	0.107837	0.0228006	0.0179107	0.2461	0.0510737	0.0223494	0.124095	0.0587417	0.267994	0.0101316	0.137811	0.125154	0.210468	-0.0779166	-0.0235598	0.0277487	-0.00363863	0.107703	0.0407848	0.126712	0.117829	0.0264967	0.0511401
66	44.22	0	-0.00643616	0.0189073	0.015882	-0.0202259	0.198353	0.0825197	0.0733834	0.133893	0.0666298	0.278467	-0.00257174	0.11831	0.0628705	0.125086	-0.0541576	-0.0484128	-0.0215893	-0.0283139	-0.00671705	0.0115491	0.107685	0.133735	0.0051517	0.055599
67	44.89	0	0.0661405	0.0440567	-0.0499971	0.0505901	0.187657	0.051207	0.053935	0.146239	0.091079	0.25298	-0.143022	0.216831	0.133398	0.162992	-0.0479894	-0.1023	-0.0472317	-0.0184972	0.0722194	0.0542539	0.0372893	0.116994	0.00389431	0.113004
68	45.56	0	0.0461023	0.0524013	-0.0187973	0.0283112	0.143641	0.0646259	0.032128	0.137263	0.112239	0.177939	0.0837178	0.143911	0.0888927	0.197102	-0.0329533	-0.0884946	-0.0476199	-0.0213851	0.0638391	0.0371995	0.0723159	0.108781	-0.00872529	0.11384
69	46.23	0	0.109953	0.0337808	-0.00576643	-0.0155323	0.0968812	0.126031	0.0401609	0.149966	0.0800979	0.140487	-0.0115789	0.028168	0.105765	0.160056	-0.0048291	-0.0593279	0.00811823	-0.0230361	0.0704499	-0.000772482	0.118523	0.166584	0.0142577	0.0955389
70	46.9	0	0.0880055	0.058753	-0.0500151	0.0305448	0.0669483	0.0545492	0.00939145	0.0122348	0.0540474	0.2146	0.0280032	0.147984	0.0440854	0.196173	0.00343402	-0.0989921	-0.00871463	-0.00610371	0.01245	0.0954599	0.107206	0.0676735	0.0371931	0.0725716
71	47.57	0	0.0228513	0.0265919	-0.028632	0.0582311	0.0970994	0.0694368	0.0762245	0.00826095	0.0567568	0.0857366	0.166285	0.357588	0.0210487	0.195509	0.0445999	-0.0915045	0.0301012	-0.0631789	0.0681778	0.108086	0.0878479	0.141339	0.0534275	-0.00199073
72	48.24	0	0.0684645	0.0224091	-0.000715523	0.0711407	0.104673	0.0785689	0.0473442	0.0737806	0.0199997	0.153212	0.089169	0.25711	0.095402	0.187887	-0.00765454	-0.0915724	-0.0502686	0.00401461	0.0148739	0.0853851	0.0557156	0.124831	0.0337854	0.145419
73	48.91	0	0.178168	0.0764109	0.0916193	0.101425	0.118103	0.0713628	-0.00904239	0.086911	0.0857064	0.273041	0.00624827	0.127316	-0.0814944	0.186253	0.00613825	-0.108454	0.0270122	-0.0610248	0.152552	0.050549	0.047181	0.0974281	0.0461466	0.0674624
74	49.58	0	0.104641	0.0194375	0.0401239	0.0735076	0.0277146	0.0248902	0.00218305	0.11715	0.0430983	-0.0269023	0.0997981	0.0628063	0.125786	0.185998	-0.03362	-0.132425	0.0208378	-0.0646577	0.0864657	0.0269016	0.0905137	0.117939	0.0683509	0.0562688
75	50.25	0	0.0656713	-0.0443708	0.0212989	0.0337636	0.0918788	0.0436909	-0.0133055	0.0899452	0.144759	0.110807	0.0260868	0.23489	0.114457	0.174762	-0.0419299	-0.0710026	0.0828786	-0.0675832	0.0417055	0.0659654	0.0974056	0.14297	0.0756273	0.120337
76	50.92	0	0.0735263	-0.00654409	0.0259772	0.0628013	0.121502	0.0687114	0.0819228	0.128159	0.0398616	0.0697185	0.0788576	0.186607	0.0353958	0.152453	-0.024221	-0.061723	0.175364	-0.0591946	0.0520362	0.0503419	0.0857644	0.0901603	0.0427163	0.105115
77	51.59	0	0.086354	0.0110663	0.0473791	0.0794741	0.149626	0.0588141	0.0238023	0.0743126	-0.0251752	0.0201435	0.0707884	0.0782514	0.0864488	0.152409	-0.0070984	-0.0566209	0.111848	-0.0734768	0.0718592	0.0345561	-0.0173136	0.0849575	0.0119406	0.0975436
78	52.26	0	0.131164	0.0283734	0.0594022	0.0343621	0.0591807	0.0611132	-0.0190733	0.0906368	0.0727356	0.024693	0.107503	0.29937	0.0871266	0.196909	-0.00542425	-0.0908592	0.0547222	-0.0807818	-0.0265873	0.138516	0.0953733	0.132567	0.0527691	0.0523186
79	52.93	0	0.0457724	0.0543643	-0.0365183	-0.0313624	0.0921011	0.0308937	-0.0226412	0.132463	0.0907086	0.106196	0.39136	0.168944	0.0272426	0.192931	-0.0389779	-0.0752164	0.0746277	-0.0655433	0.0350044	0.0102623	0.0931824	0.13351	0.0117027	0.0387807

## Sheet: 20201103_SS31345_Fdg
Responses of Fdg (SS31345) to taste detection in food-deprived animals
Frame	Time (seconds)	Taste stimulus	20201103_Fly1_water	20201103_Fly1_sugar	20201103_Fly1_bitter	20201103_Fly2_water	20201103_Fly2_sugar	20201103_Fly2_bitter	20201103_Fly3_water	20201103_Fly3_sugar	20201103_Fly3_bitter	20201103_Fly4_water	20201103_Fly4_sugar	20201103_Fly4_bitter	20201103_Fly5_water	20201103_Fly5_sugar	20201103_Fly5_bitter	20201103_Fly6_water	20201103_Fly6_sugar	20201103_Fly6_bitter	20201103_Fly7_water	20201103_Fly7_sugar	20201103_Fly7_bitter	20201103_Fly8_water	20201103_Fly8_sugar	20201103_Fly8_bitter
0	0	0	-0.124169	-0.0439827	0.0133008	0.0404181	-0.0196675	0.00528481	-0.0303319	0.00131519	-0.019552	-0.151916	-0.0856168	-0.00870586	0.0969701	0.00579194	-0.00510879	0.106171	0.0309783	0.0400121	-0.0043012	-0.027865	0.0570793	-0.0166134	0.0141758	0.0384525
1	1.2	0	-0.110438	-0.0193258	0.0203241	0.0276957	-0.0266034	0.00105913	-0.0415382	0.0110556	0.00638197	-0.129771	-0.048387	-0.0554032	0.0941175	0.0931705	0.126876	0.0593414	0.0195642	0.0159572	0.018773	0.00351725	0.0923045	-0.00829032	0.00916636	0.0191205
2	2.4	0	-0.129909	-0.0230791	0.00754808	0.072073	0.0301019	-0.0253092	0.0400885	0.0348797	0.0445109	-0.152084	-0.0723059	-0.0583838	0.0848923	0.0644362	0.042527	0.040443	0.00982115	0.00644844	0.0136194	-0.0346673	0.0842691	-0.00540435	0.00588668	0.0102355
3	3.6	0	-0.111473	-0.02302	0.00778556	0.0766021	0.0328667	0.0076617	0.074294	-0.00518452	0.0642006	-0.142686	-0.0673346	-0.0462014	0.041636	0.0618217	0.0229603	0.0275906	0.00484122	0.0131874	0.00269134	-0.00853499	0.0808659	-0.0109984	0.00603519	0.010347
4	4.8	0	-0.078697	-0.0117701	0.00232852	0.0471557	0.022735	0.0291701	0.123203	-0.0259918	0.0368311	-0.0980639	3.8801e-06	-0.0219514	0.0661498	0.0957069	0.0402228	0.010892	0.00520489	0.0107655	-0.00343445	0.0156223	0.095392	-0.00195127	-0.00658853	0.00288473
5	6	0	-0.060833	-0.0139586	0.00580573	0.0394315	0.0233543	0.0186807	0.128668	0.116576	0.0130268	-0.095806	0.0100954	-0.0127576	0.0489389	0.00944658	0.0573003	0.0117422	0.0154415	0.00340991	0.00855945	-0.0107499	0.0759642	-0.01262	0.00208513	0.00413191
6	7.2	0	-0.0481896	-0.0158791	-0.00110174	0.0129722	0.0308348	0.0316914	0.122364	0.0292492	0.0356153	-0.090837	0.000521102	-0.00695953	0.0459904	0.0516813	0.060334	0.00550273	0.0154792	0.00475694	0.014082	-0.0122454	0.0734722	-0.000320789	0.0024246	-0.000818107
7	8.4	0	-0.0490278	-0.00885497	-0.00313386	0.00332804	0.0298949	0.0252942	0.0969867	0.000929269	0.0291215	-0.0536717	0.0388432	-0.00643366	0.0988825	0.0144946	0.0129691	0.00665436	0.0110928	0.00517378	-0.0118735	-0.0295571	0.0827894	-0.00720728	0.000175986	0.00264872
8	9.6	0	-0.0477208	-0.00871149	-0.00683493	0.0167933	0.036398	0.0223655	0.100318	-0.0471668	0.0181949	-0.0372305	0.030737	-0.0159921	0.0280702	0.0442783	0.000152868	0.00474247	0.017102	0.0180892	-0.0176889	-0.0337803	-0.00461317	-0.00412251	-0.0112621	0.00388567
9	10.8	0	-0.035534	-0.0275105	-0.00886167	-0.00556537	0.00458598	0.00968209	0.0955934	-0.0398789	0.0221253	-0.0322961	-0.00178063	0.0312006	0.0212241	5.28817e-05	0.0246261	0.00685229	0.00105471	0.0069473	-0.0133083	0.0158742	-0.0534574	-0.00985433	0.000179183	0.00661574
10	12	0	-0.0174019	-0.00952508	0.00561597	0.021438	0.0217948	-0.00391844	0.0865461	0.0266248	0.0433468	-0.0157816	-0.0145125	0.0344334	0.000413921	0.0623476	0.0488652	0.00225477	0.00596461	-0.000485943	-0.00495711	0.0110127	-0.0123263	-0.00533955	-0.00840214	0.00166567
11	13.2	0	-0.0148456	-0.0081789	0.00696628	0.0156005	-0.0143586	0.0130719	0.0646042	0.06328	0.0565609	-0.00596265	0.0416185	0.0106181	-0.0109539	0.0101236	-0.00633589	0.00577264	0.000840266	0.0107129	-0.0109131	0.000283546	0.027827	-0.00798217	-0.0091916	0.000209552
12	14.4	0	-0.00600976	-0.00526816	8.2787e-05	-0.00128016	0.010565	-0.0111276	0.0207611	0.071923	0.0146552	-0.0192681	0.0504736	-0.00600062	-0.0204987	-0.0063566	-0.00796852	0.00826034	-0.00382574	-0.00180547	-0.00365699	-0.00258712	0.0361413	-0.00214265	-0.00932219	-0.00386044
13	15.6	0	3.93362e-05	0.0210064	-0.00672934	0.0135122	0.00565749	-0.002277	-0.0433294	0.0162847	-0.00809343	0.00266387	0.0381315	-0.0155735	0.0392308	-0.00950264	-0.0228374	0.00548024	-0.00207303	-0.00454053	0.0082842	-0.0209685	0.012321	0.00348476	0.0116779	-0.0028354
14	16.8	0	0.011739	0.0175559	0.000609121	0.0105524	-0.00426562	0.00737863	-0.0790431	-0.0015109	-0.0172886	0.00877995	-0.0172634	0.00164769	0.0192705	0.0283658	-0.0351892	0.00295655	0.000691027	-0.00240758	0.0132446	-0.0169852	0.0173236	0.00893871	0.00175988	-0.0046179
15	18	0	0.0128628	0.00620224	-0.0125763	-0.00354007	0.00392497	0.0134839	-0.0581756	-0.0324931	-0.0255826	0.014368	-0.0174235	-0.031722	-0.0106959	-0.00506726	-0.00605426	-0.00379128	0.00473351	0.00537207	0.0150425	0.0101235	0.0101501	0.0122584	0.00780354	0.0056872
16	19.2	0	0.014465	0.000213752	0.00756759	-0.0162949	-0.0104234	-0.0294895	-0.0610583	-0.0426504	-0.0381934	0.0635809	-0.0392119	-0.0119288	-0.0214764	-0.0369648	0.00696843	-0.0142279	-0.000920654	-0.00821783	-0.00537878	0.0356307	-0.0258877	-0.000883775	0.00554539	-0.00285777
17	20.4	0	0.0346852	0.0055043	0.00732555	-0.0344226	-0.0174807	0.00319601	-0.0258985	-0.0615794	-0.0475301	-0.0160843	-0.0400318	-0.0126748	-0.0165144	-0.0429986	-0.00207441	-0.0135576	-0.0064647	-0.00557492	0.00164304	-0.0323838	-0.0120916	0.00152057	-4.99519e-05	-6.656e-06
18	21.6	0	0.0258602	0.00650579	0.00554643	-0.0401686	-0.00822158	0.00624242	-0.0635826	-0.0863886	-0.0515859	-0.0211128	-0.0290704	-0.0445256	-0.0803167	0.00578823	-0.00570511	-0.0121676	-0.00401555	0.00651019	0.000419058	-0.00688816	0.0113881	0.000642809	0.00299126	-0.00043782
19	22.8	0	0.014879	0.00856735	-0.00147308	-0.023018	-0.0277171	0.0102453	-0.0707455	-0.114852	-0.0828536	-0.0192667	-0.0475614	-0.0382455	-0.0449027	-0.0272628	0.0138387	-0.00161398	0.00187769	-0.00451882	-0.0207284	0.0492077	0.0350484	0.0116038	0.0172899	-0.00536659
20	24	1	0.010551	0.0331869	-0.00959267	-0.0181934	-0.00379866	-0.026236	-0.0901968	-0.0323195	-0.0810648	-0.0442275	-0.01427	-0.0437405	-0.0309044	0.00161426	0.0157562	0.0147068	0.068683	-0.00109674	-0.0219465	0.0399639	0.027805	0.0215868	0.0476187	-0.0100351
21	25.2	1	0.0415981	0.0660207	-0.00175416	-0.0453984	0.0282604	-0.0205868	-0.063136	0.387283	-0.0293357	-0.0902965	-0.0234207	-0.038104	-0.0268151	-0.0267041	0.00286239	0.0180537	0.0607888	0.0128454	-0.0121605	0.0241362	0.0618084	0.0143933	0.0277114	-0.00501214
22	26.4	1	0.0374172	0.0305837	-0.000219369	-0.0648232	0.0311396	-0.00305043	-0.0769338	0.330701	-0.0534808	-0.0748441	-0.0309348	-0.0414515	-0.0109482	-0.0475578	0.0266008	0.00353236	0.0425286	-0.00316504	-0.0137241	0.0523231	0.0564336	0.00510198	0.0138514	-0.0183784
23	27.6	1	0.040773	-0.0031524	0.0109873	-0.0904689	0.0298016	-0.00739166	-0.0759593	0.252826	-0.0530938	-0.0756793	-0.0322332	-0.0506916	-0.0469819	-0.0125205	0.0121935	-0.00407019	0.0356177	-0.00766155	-0.0248279	0.0459628	0.0333945	0.000508408	0.00275817	-0.00882959
24	28.8	1	0.0372075	-0.0155827	0.00996772	-0.0691059	-0.0100581	-0.00307893	-0.0721757	0.162982	-0.106244	-0.0938948	-0.0265692	-0.0624226	-0.0252322	-0.0236324	0.0657223	-0.0228022	0.0203205	-0.00394903	-0.0247986	0.0244027	0.022455	0.00262184	0.00630719	-0.0109857
25	30	1	0.0238734	0.0177298	0.0187558	-0.08884	0.0509453	0.00253794	-0.0882355	0.102659	-0.112228	-0.0689967	-0.0317278	-0.0444441	-0.0548891	-0.0685193	0.0292632	-0.0199186	0.0237081	-0.0164037	-0.0221574	0.0614399	0.0540153	0.00381026	0.000715524	-0.00755249
26	31.2	0	0.0434972	0.0117801	0.0205286	-0.127	0.0371428	0.0121936	-0.0908214	0.0580479	-0.0882939	-0.101745	-0.00168409	-0.0722202	-0.0881708	-0.0396179	0.0100263	-0.0167741	0.0376061	-0.00985963	-0.0183156	0.0892885	0.0282744	-0.000100635	0.00150726	-0.0226732
27	32.4	0	0.0137902	0.0164254	-0.0002158	-0.122781	0.083636	-0.00461496	-0.079265	0.0269252	-0.125869	-0.073136	-0.00697546	-0.0688156	-0.0682647	-0.0927779	-0.0177124	-0.0181956	0.0353048	0.00483558	-0.0207635	0.0810156	0.0741591	-0.00926616	0.00896862	-0.0205191
28	33.6	0	0.0359794	0.002426	0.011805	-0.140903	0.0480734	-0.00977429	-0.0725414	-0.000935739	-0.10684	-0.109955	-0.00171605	-0.0802771	-0.0983129	-0.0762266	-0.0480939	-0.0215381	0.0450787	-0.00107551	-0.0205761	0.0531944	0.0394403	-0.00508306	-0.00407753	-0.0216794
29	34.8	0	0.0496154	-0.0137998	0.0191924	-0.12224	0.0205641	0.00151938	-0.0947236	-0.0491653	-0.121364	-0.101396	-0.0360184	-0.0749525	-0.0671199	-0.0582484	-0.0125739	-0.0302877	0.0424175	0.00252846	-0.0225673	0.0528443	0.0508641	-0.00686887	0.000566969	-0.0130285
30	36	0	0.052419	-0.00244625	0.0282872	-0.0823865	0.0102146	0.00417915	-0.0263521	-0.0666741	-0.0988631	-0.0871507	-0.0205683	-0.0914204	-0.0896785	-0.0674274	-0.021202	-0.0313539	0.0221162	-0.00121397	-0.0220285	0.052663	0.0604258	0.00671665	-0.00773969	-0.021597
31	37.2	0	0.0688338	0.0165176	0.0170922	-0.0397367	0.0397642	-0.00733074	-0.0313844	-0.0844964	-0.124127	-0.0846298	-0.00896804	-0.055248	-0.0848625	-0.0877348	-0.00727353	-0.0223118	0.0271169	-0.000470987	-0.0197914	0.0587263	0.057943	0.0148229	0.0189587	-0.0176176
32	38.4	0	0.0657713	0.0243957	0.00876512	-0.0531375	0.0313	0.0031922	-0.0771753	-0.0966962	-0.125385	-0.101578	-0.00361246	-0.0821868	-0.0648999	-0.118199	-0.0510102	-0.0285153	0.0341939	-9.46691e-05	-0.0221164	0.0793587	0.0872482	-0.00188229	0.0193252	-0.0152103
33	39.6	0	0.0524946	0.042839	-0.00100006	-0.0939738	0.0102118	-0.0373458	-0.0740234	-0.0995161	-0.110745	-0.130437	-0.0208286	-0.0934956	-0.0865647	-0.0944837	-0.040398	-0.0274222	0.0237844	-0.00429061	-0.0268776	0.0729487	0.0812713	0.00762848	0.021185	-0.0209305
34	40.8	0	0.0439606	0.0393506	-0.00243218	-0.108977	0.00136823	-0.0214467	-0.0864565	-0.132475	-0.0811654	-0.135076	-0.0534248	-0.0994376	-0.0828983	-0.0731153	-0.0419847	-0.0446156	0.0156444	0.000347746	-0.0276389	0.0922472	0.0825585	-0.00886624	0.0148549	-0.0143347
35	42	0	0.0528611	0.0382085	0.00396869	-0.120514	-0.0219232	-0.0219436	-0.0753684	-0.132811	-0.103956	-0.163416	-0.0257044	-0.111883	-0.105344	-0.078252	-0.0550107	-0.0430007	0.0231198	-0.000706909	-0.0332377	0.0507937	0.0661542	-0.0168094	0.0151786	-0.00366714
36	43.2	0	0.0523751	0.0472866	0.0121744	-0.118295	-0.0239945	-0.0179022	-0.0901779	-0.13332	-0.126705	-0.173081	-0.0257368	-0.122895	-0.0875658	-0.112572	-0.0789679	-0.0493841	0.0234811	-0.00125498	-0.0216186	0.0759246	0.0702801	-0.0122837	0.0146242	-0.0192397
37	44.4	0	0.0183314	0.0355724	-0.00161158	-0.130281	-0.0129722	-0.0491299	-0.0644142	-0.145164	-0.152979	-0.171126	-0.0272056	-0.123346	-0.0998476	-0.108153	-0.0541495	-0.0616966	0.00641378	-0.0099595	-0.0381863	0.0999191	0.049356	-0.0159593	0.0141015	-0.0233903
38	45.6	0	0.0131355	0.0376371	-0.00161555	-0.119073	0.0325173	-0.0279612	-0.0917064	-0.146079	-0.136737	-0.179654	-0.0575295	-0.111916	-0.0908621	-0.137732	-0.0987262	-0.0312594	0.0153642	0.00109218	-0.0188895	0.0750782	0.0567583	-0.0038475	0.0097401	-0.0268708
39	46.8	0	-0.00181528	0.0361723	0.0233521	-0.0984378	0.015224	-0.0352695	-0.0937822	-0.145167	-0.137738	-0.185589	-0.054015	-0.115499	-0.125169	-0.115745	-0.0752971	-0.0242552	0.0218617	-0.00297061	-0.0272173	0.0783304	0.0748966	-0.00608285	0.00157912	-0.0227225
40	48	0	0.0284046	0.0261609	0.0234204	-0.0239696	0.0454416	-0.0469055	-0.0905537	-0.140369	-0.134082	-0.183064	-0.0280214	-0.107124	-0.126266	-0.167188	-0.0874818	-0.0191493	0.0206484	0.00474729	-0.0358555	0.0671036	0.106711	-0.00665906	0.00408438	-0.0249492
41	49.2	0	0.0610341	0.013979	0.0535454	-0.0317683	0.0102965	-0.046253	-0.09781	-0.154887	-0.142771	-0.167949	-0.0120691	-0.102868	-0.103426	-0.157093	-0.0838014	-0.0306521	0.0152628	-0.0175587	-0.0356036	0.100625	0.102307	-0.000363775	0.0261164	-0.0137987
42	50.4	0	0.0747546	0.022741	0.0529134	-0.0682976	0.0378293	-0.0564004	-0.0969231	-0.140803	-0.149233	-0.134378	-0.0342779	-0.120278	-0.0866892	-0.152223	-0.0659952	-0.0443817	0.0145437	-0.00796357	-0.0401189	0.0809761	0.0782715	-0.00184269	0.0323104	-0.0151958
43	51.6	0	0.0766497	0.0434938	0.0446734	-0.0817301	0.0102977	-0.0682602	-0.0930874	-0.151027	-0.153943	-0.0988905	-0.0373296	-0.12957	-0.105338	-0.143823	-0.100817	-0.0474587	0.00231623	-0.0211125	-0.0386373	0.0879762	0.0874466	-0.00508493	0.00566718	-0.013827
44	52.8	0	0.0877745	0.0588827	0.0446139	-0.096452	0.00567327	-0.0497467	-0.0648817	-0.14894	-0.155644	-0.138806	-0.0406214	-0.113949	-0.113166	-0.157738	-0.116873	-0.0383222	-0.000259947	-0.0154233	-0.0378584	0.0870912	0.0788299	0.00587179	0.0116068	-0.016366
45	54	0	0.0894062	0.0367924	0.033917	-0.11166	0.00534615	-0.0213098	0.00248317	-0.157049	-0.156057	-0.169303	-0.0267913	-0.12625	-0.131959	-0.153413	-0.135381	-0.0531314	-0.00488586	-0.0257996	-0.0323006	0.10387	0.0938545	0.000929614	0.0222485	-0.0243494
46	55.2	0	0.0885642	0.0335579	0.0296601	-0.129757	0.0926809	-0.0461969	0.0147827	-0.157096	-0.155918	-0.156139	-0.0143816	-0.162558	-0.122411	-0.167481	-0.10515	-0.0494471	-0.0141657	-0.0237187	-0.0353577	0.12327	0.0924259	-0.0108682	0.0212792	-0.014873
47	56.4	0	0.0485242	0.0625742	0.0245534	-0.108731	0.0841398	-0.0486882	-0.0373051	-0.151815	-0.142956	-0.262407	-0.0219834	-0.181209	-0.140436	-0.175236	-0.109403	-0.0519573	-0.0177199	-0.0208515	-0.0326227	0.0959671	0.0925423	-0.00362328	0.0237615	-0.0209347
48	57.6	0	0.0283399	0.060081	0.0270556	-0.115928	0.0862683	-0.0525821	-0.0682746	-0.144232	-0.16929	-0.167157	-0.0523384	-0.143094	-0.127543	-0.196716	-0.0897458	-0.0596948	-0.0189684	-0.0181579	-0.0443004	0.0817698	0.0841517	-0.0189895	0.0293342	-0.0281388
49	58.8	0	0.0145875	0.0686993	0.0253098	-0.0894776	0.0532478	-0.0786279	-0.0872554	-0.134095	-0.136749	-0.169485	-0.0335801	-0.162423	-0.0827793	-0.180216	-0.112322	-0.0568562	-0.0272852	-0.0161673	-0.0352991	0.0595185	0.074071	-0.0095516	0.0262142	-0.0212708
50	60	0	0.0205213	0.0559505	0.0120372	-0.0850097	0.0689835	-0.0750509	-0.10399	-0.161289	-0.0760258	-0.199221	-0.0395222	-0.130644	-0.102535	-0.190062	-0.113483	-0.0719398	-0.0206066	-0.022227	-0.0324588	0.0760476	0.0788067	-0.00975339	0.0146249	-0.02777
51	61.2	0	0.0573073	0.0460901	0.0236943	-0.107052	0.0413339	-0.0607372	-0.105347	-0.150783	-0.0637534	-0.183648	-0.0374064	-0.146701	-0.0770912	-0.190377	-0.121153	-0.0846347	-0.0243651	-0.0162078	-0.0337472	0.0760025	0.0736308	-0.0155309	0.025888	-0.0278305
52	62.4	0	0.078627	0.0318013	0.0115036	-0.131367	0.0614444	-0.0677105	-0.111099	-0.155643	-0.084199	-0.189942	-0.0874888	-0.155384	-0.0367087	-0.178127	-0.132162	-0.0733299	-0.0328375	-0.0367504	-0.0318555	0.0739631	0.124346	0.000850077	0.0277711	-0.0215428
53	63.6	0	0.0786056	0.0321126	0.0240184	-0.120558	0.0314137	-0.0707377	-0.107057	-0.156085	-0.116125	-0.210313	-0.100347	-0.172468	-0.0841623	-0.192089	-0.127964	-0.072952	-0.0359024	-0.0285631	-0.0358203	0.0859221	0.112619	-0.0119073	0.0190664	-0.0229838
54	64.8	0	0.0766984	0.0468338	0.0183508	-0.0994316	0.0346386	-0.0764872	-0.118816	-0.157343	-0.139161	-0.193966	-0.0886899	-0.10587	-0.101154	-0.193436	-0.104792	-0.0765598	-0.0283956	-0.0430041	-0.0318907	0.0766868	0.128657	-0.0166272	0.00759857	-0.0231222

## Sheet: 20210817_SS47744_Roundup
Responses of Roundup (SS47744) to taste detection in food-deprived animals
Frame	Time (seconds)	Taste stimulus	20210817_Fly1_water	20210817_Fly1_sugar	20210817_Fly1_bitter	20210817_Fly2_water	20210817_Fly2_sugar	20210817_Fly2_bitter	20210817_Fly3_water	20210817_Fly3_sugar	20210817_Fly3_bitter	20210817_Fly4_water	20210817_Fly4_sugar	20210817_Fly4_bitter	20210817_Fly5_water	20210817_Fly5_sugar	20210817_Fly5_bitter	20210915_Fly6_water	20210914_Fly6_sugar	20210914_Fly6_bitter
0	0	0	0.0543441	-0.0389896	0.0865522	0.0672383	-0.0226771	0.0735928	-0.053642	0.0712982	0.00714473	-0.0905729	-0.000695916	-0.0782102	-0.00409829	0.0155505	0.0268676	0.0354773	-0.022894	-0.00575512
1	0.67	0	0.0435879	-0.00153995	0.0334998	-0.0514728	-0.0421385	0.0452376	0.178781	-0.0494374	-0.146003	-0.0299399	-0.00738078	-0.0101868	0.0035632	0.072803	0.0582362	-0.00408864	-0.0306569	0.0523548
2	1.34	0	0.0234441	0.0237837	0.0564922	0.0136625	-0.0696479	0.11887	-0.0993546	0.0235598	0.0514221	-0.0433026	0.0316612	-0.0429608	-0.0791538	-0.0227984	-0.0263199	0.0156913	0.0504906	-0.0185527
3	2.01	0	-0.00640537	0.0508071	0.0382324	0.0952584	0.0111079	0.0230959	0.0356755	-0.0267711	0.00262993	-0.0777955	-0.00809635	-0.0188607	-0.0290808	0.04751	-0.0188197	-0.0678323	-0.0122569	0.0705813
4	2.68	0	-0.0129986	0.0242504	0.0406469	-0.0156762	0.0522482	0.0406102	-0.172641	0.0137912	0.139522	-0.0280257	0.0111983	-0.0102851	0.00919967	0.0206035	-0.0310117	-0.0416869	-0.0991901	-0.0365392
5	3.35	0	0.04317	0.0506847	0.0121896	-0.0221355	0.0299119	0.103333	-0.137954	-0.00299752	0.14949	-1.74992e-05	0.0274454	0.0894875	-0.0213644	-0.000327071	-0.0106028	0.0256783	0.0159754	0.0220552
6	4.02	0	0.0618167	0.0615681	0.00246509	-0.0600105	0.0280715	-0.0337561	0.000639987	-0.0177377	0.113921	-0.00724743	0.10126	0.0387965	0.0384914	-6.59053e-05	0.0302996	0.00703259	-0.00358073	-0.0497038
7	4.69	0	0.0200002	0.0263908	0.0215749	-0.0448291	-0.0410987	0.0535744	-0.146182	-0.0413346	0.108768	0.00864956	0.0754319	-0.00058612	-0.0277052	-0.0654879	0.0344969	-0.0241063	0.10515	-0.0494616
8	5.36	0	-0.0120192	0.0552601	-0.0240287	-0.0365043	-0.0312945	0.0924231	-0.0625087	-0.0796487	0.000407298	-0.0030915	0.0411973	0.0821697	0.0178609	0.00977078	-0.0227251	-0.0628749	0.0691696	0.0574817
9	6.03	0	0.0636647	-0.0131508	0.0335536	0.0235185	0.0674439	0.0349426	-0.105195	-0.0491691	-0.0225982	0.0706107	-0.0345753	0.0970064	-0.0153022	0.0165722	0.012003	0.0365897	0.0685125	-0.0152365
10	6.7	0	-0.0360945	-0.0590909	0.00930724	0.020118	0.0325142	0.0888103	0.152075	-0.0246489	-0.0169173	-0.0511363	-0.0316114	0.0340393	-0.0433668	-0.00524265	0.0183888	-0.049595	0.0265868	-0.0338482
11	7.37	0	-0.0767733	0.0146101	0.019674	0.00760756	0.0677414	-0.00233504	0.114049	0.00453942	0.0234621	0.0669599	-0.0206373	-0.0454259	-0.04593	-0.00309751	0.0380855	0.0288666	0.0771467	-0.0037705
12	8.04	0	-0.0353306	-0.0245883	0.0273793	0.0997437	0.0225414	0.0662855	0.00826266	0.0141658	-0.0300462	0.000363309	0.0772415	0.0472254	-0.00944939	-0.0198873	-0.00538819	-0.0524042	0.0287697	-0.0169522
13	8.71	0	-0.0234233	-0.0129444	0.0122413	-0.0026816	0.117317	0.0421319	0.0302937	0.0221762	0.00496196	-0.024738	-0.0826954	0.0290861	-0.0263326	-0.0480158	0.00554391	-0.00920774	0.0516611	-0.0499524
14	9.38	0	-0.0180625	-0.0750431	0.0174201	-0.0363912	0.0644347	-0.0238564	0.0780155	-0.00381741	-0.031191	0.0205687	-0.0155752	-0.033933	-0.0578172	0.00116028	-0.0023334	-0.00717921	0.021224	-0.0175732
15	10.05	0	-0.0227669	-0.0370235	-0.0188132	-0.108478	0.0330051	-0.0272435	-0.114753	0.00679191	0.0939617	-0.01706	0.0354799	-0.0985449	-0.00462001	-0.0379468	0.03878	0.00343132	0.00633449	-0.0188536
16	10.72	0	-0.0171563	-0.0727762	-0.0310844	0.00547857	0.0274173	-0.0214412	0.151759	-0.015488	-0.0488597	-0.00550013	0.0555797	0.0337001	0.0115168	-0.0339333	0.000573194	-0.0334065	-0.0393645	-0.0382869
17	11.39	0	-0.0433584	-0.0352983	-0.0268967	0.0841689	0.139664	-0.118719	-0.0315223	-0.0306365	0.0233163	0.0628535	-0.0082248	-0.00338247	0.0261524	0.0319118	0.0719998	-0.00180211	-0.0321235	-0.0239912
18	12.06	0	-0.0599706	0.0872812	-0.00148447	0.0262974	0.121447	-0.00837304	-0.0181555	0.00572888	-0.0903998	0.0497998	-0.0300489	0.0640758	-0.0131542	-0.0422196	0.0125604	0.0436869	-0.0435502	0.0213499
19	12.73	0	-0.0061571	0.0199513	-0.0292105	-0.04638	-0.0172103	-0.0729836	0.0296126	0.0295637	0.00589035	0.0541067	-0.0632982	-0.0550526	0.0339993	-0.0666889	0.0431016	0.0255602	-0.094413	0.000809063
20	13.4	0	0.0352236	0.0290711	-0.0338091	-0.0625745	0.0079925	-0.0371082	-0.171691	0.00944259	0.0206639	0.0684098	-0.0687103	-0.0228728	-0.0303154	-0.0464845	0.000491438	0.0245027	0.0231011	0.0532265
21	14.07	0	0.0590514	-0.0640223	-0.0296563	0.0197737	-0.0910531	-0.104164	0.157106	0.0257991	-0.0203949	0.0483337	-0.0300179	-0.0417495	0.0253459	0.098633	-0.107567	0.0138343	0.00244687	-0.0643505
22	14.74	0	-0.0485621	-0.0225723	-0.0454699	-0.00520112	-0.0792168	-0.107256	0.0949601	0.0114339	-0.013382	0.0442042	0.0160893	0.0634583	0.0419743	0.0235899	-0.0848777	-0.0149429	0.010585	0.0179024
23	15.41	0	-0.0182497	0.0180582	-0.0297503	0.00888353	-0.0948435	-0.134815	0.0960871	0.0271003	-0.132854	-0.03703	0.0605306	0.00134968	0.0540285	0.044509	-0.0455977	-0.0367115	-0.0050474	0.0253746
24	16.08	0	0.0672868	-0.0374657	-0.0631387	-0.0205094	-0.126542	-0.0933013	-0.117646	0.0791582	-0.102917	-0.039677	-0.073265	-0.068353	0.0482593	-0.0111383	-0.0268415	0.0182832	-0.0628549	0.0873545
25	16.75	0	-0.0153345	0.00348111	-0.0262474	0.0221827	-0.106725	-0.0206819	0.09893	-0.0208708	-0.0630618	-0.0267551	-0.0105107	-0.00683836	0.0553537	0.0101859	0.00666042	0.0341956	-0.0912863	-0.031154
26	17.42	0	-0.0189264	0.0293074	-0.0516392	0.0189127	-0.100412	0.0231273	0.00499803	0.0180086	-0.0269368	-0.0129702	-0.0477718	-0.0431524	0.0419449	0.0105343	-0.0160039	0.0930082	-0.019935	0.0654917
27	18.09	0	-0.00996514	-0.0029347	-0.0163557	-0.00119193	-0.109438	0.036794	-0.2041	0.0578946	-0.108723	-0.0346387	-0.0557057	0.0483897	-0.0165206	0.0347185	-0.0587188	0.0188781	-0.0324493	0.0982657
28	18.76	0	-0.00963512	0.0733741	-0.0552424	0.00488607	-0.14804	-0.00350573	-0.0693306	0.0244157	-0.033929	0.00439103	0.0862041	-0.0198559	0.043454	0.062965	-0.0376619	-0.0393154	-0.0286759	-0.022061
29	19.43	0	0.006536	0.0516849	-0.0718509	-0.0473954	-0.0182451	0.0676418	-0.0677444	0.0105646	-0.0210449	-0.0186007	0.0598652	-0.0329151	0.011319	-0.0361396	-0.0555437	0.0410326	-0.060093	0.0711105
30	20.1	1	-0.0108623	-0.00839336	-0.0722637	-0.00316117	-0.0836612	0.00493641	0.00821019	0.0537488	-0.0705281	-0.0197606	0.0371743	0.0189792	-0.0558	-0.00905736	-0.034023	0.0309674	-0.0188664	0.0554288
31	20.77	1	-0.00547107	0.0229915	-0.0452156	0.0476104	-0.0477042	0.0760248	0.0197685	0.321442	0.134446	0.0333348	0.218659	-0.0279821	0.040603	0.464997	0.00195173	0.0601168	1.02545	0.0682232
32	21.44	1	-0.00888233	0.567445	-0.0412694	0.0472913	1.04631	0.0122453	-0.0809466	0.434448	0.106162	0.0343684	0.740297	-0.04068	0.00511483	0.739765	-0.0353375	-0.000952189	1.46991	0.0479374
33	22.11	1	-0.035271	0.748698	-0.0391089	0.0788468	0.94774	0.0597689	0.106621	0.321976	0.120501	0.0578285	0.60921	0.0895332	0.029446	0.49023	0.0445255	0.0112634	1.00405	0.0716536
34	22.78	1	-0.0423446	0.492089	-0.047555	0.102758	0.611575	0.0689232	0.0818883	0.300273	0.13265	0.00711388	0.471695	0.00192728	0.0822081	0.339675	0.0221176	-0.016575	0.792337	-0.0445577
35	23.45	1	0.0757948	0.374646	-0.019466	0.00168415	0.398664	0.0770982	-0.158156	0.175352	0.104631	-0.00657232	0.367856	0.111584	0.0394744	0.254235	0.0108392	0.0610908	0.550315	0.0242735
36	24.12	1	0.0526593	0.40302	-0.0621389	0.0585637	0.342554	0.0577907	-0.144888	0.0705601	0.0689423	0.031751	0.326316	0.11245	0.0618505	0.208056	0.0554955	0.0140464	0.298166	-0.0380415
37	24.79	1	0.0165518	0.349393	-0.057783	-0.0539338	0.244823	0.0977348	-0.0735146	0.0948483	0.107592	0.0472878	0.154649	0.0306363	0.0754226	0.152112	0.031024	-0.00845936	0.227256	-0.0177695
38	25.46	1	0.0196374	0.288299	-0.0678397	0.127345	0.164686	-0.0192861	-0.0234375	0.142426	0.0444145	-0.0205666	0.239082	0.0695433	0.112159	0.143794	0.0702626	0.0407047	0.159122	0.000541246
39	26.13	1	0.0155435	0.22482	-0.0496765	0.105686	0.0610099	0.0563064	0.0508282	0.133965	-0.0554632	0.0438269	0.0623828	0.0622176	0.0694639	0.0206733	-0.017234	0.00475735	0.0887639	-0.00785818
40	26.8	1	0.0518681	0.163127	-0.0142291	0.0926462	0.0283935	0.0591143	-0.0921288	0.0415336	0.0420313	0.0391112	0.144494	0.000304258	0.0687023	0.0611003	0.020635	-0.0114356	0.25859	0.017912
41	27.47	0	-0.0152482	0.145967	-0.0595566	0.0417856	-0.0582687	0.0381126	-0.0234433	0.133338	0.0828985	0.0263285	0.0625351	0.0998692	-0.0280207	0.0404532	0.0165348	0.0836477	0.329412	-0.0427544
42	28.14	0	0.0163711	0.0679492	-0.0280729	0.0601033	-0.033033	-0.0352457	0.0125004	0.0870157	0.0711014	0.0203561	0.11629	0.0618955	0.0721056	0.0459955	0.0263308	0.0935392	0.292513	-0.022076
43	28.81	0	0.0368833	0.119193	-0.0281087	0.119457	-0.0483733	0.0462299	-0.066209	0.0476654	0.137479	0.0419253	0.0908909	0.0761715	-0.051155	0.0218032	0.110595	0.0128324	0.181886	0.0585391
44	29.48	0	0.0352601	0.0534232	-0.064665	-0.00903485	-0.122124	0.0525369	0.0173636	0.121363	0.135355	0.0340394	0.10195	0.127053	0.0431829	-0.0415431	0.0766385	0.0168308	0.1603	-0.0670394
45	30.15	0	0.038064	0.0341068	-0.0351297	0.0424773	-0.0421963	0.00836114	-0.037357	0.150909	0.0334916	0.0618717	0.0832613	0.123982	0.00391862	0.0353854	0.114136	0.077984	0.19192	-0.0168765
46	30.82	0	-0.0391793	0.0927641	-0.0650167	0.105178	-0.0582346	0.0207038	-0.0571071	0.192493	0.0434326	-0.00621985	-0.0465713	0.13069	-0.0154664	-0.0265307	0.0185627	0.0824601	0.222566	-0.0415039
47	31.49	0	0.0346838	0.0503819	-0.0831537	0.194872	-0.0596366	0.0960814	-0.113053	0.111264	0.0270098	-0.0424413	0.0102429	0.0653472	0.0491612	-0.051773	0.0175806	-0.008421	0.188696	-0.042159
48	32.16	0	-0.0493781	0.0698957	-0.0437097	0.186316	0.00632655	-0.0623811	0.0607701	0.044692	-0.0770195	0.0572796	-0.0331901	0.0878091	0.0235124	-0.0289434	-0.0282697	-0.00532441	0.179148	-0.00807585
49	32.83	0	-0.0360382	0.0861029	-0.0242054	0.0738759	0.0628593	-0.0635231	-0.0700437	0.0145247	-0.000925483	-0.0300219	0.00675876	0.0299017	0.0145259	-0.0527037	0.017386	-0.00996365	0.173513	-0.0205085
50	33.5	0	-0.0145571	-0.0212149	-0.038671	0.108925	-0.025971	0.0523231	-0.0832065	-0.00691409	0.0397082	-0.0597912	0.0242732	0.0857797	0.0792357	-0.0355368	-0.0328212	0.0419058	0.166175	-0.0313535
51	34.17	0	0.021353	0.0304616	-0.0590411	-0.0289339	-0.0828934	0.0207499	0.00150658	0.020528	-0.0288132	0.0374705	0.022399	0.134482	-0.0109439	-0.0490053	-0.0597684	0.126682	0.192555	-0.0135698
52	34.84	0	-0.00184364	-0.0327441	-0.0313853	0.0277452	-0.0393906	0.0342444	0.0240614	0.0572053	0.0453522	0.0193928	-0.019654	0.151561	0.0412411	0.0238529	0.0473026	0.00665652	0.200053	-0.0784211
53	35.51	0	0.0135557	0.00904962	-0.0368804	0.00491458	-0.102355	-0.0273443	-0.0573502	0.0594804	0.0804977	0.0252823	0.0643166	0.125656	0.0474817	-0.0230933	0.00645191	0.0936926	0.187137	0.0219378
54	36.18	0	-0.0170277	0.015199	-0.0121646	-0.029857	-0.0496632	-0.0110563	-0.0336032	0.0847241	-0.00562625	-0.0134637	0.0809158	0.0366766	0.00808428	-0.0461845	0.0656677	0.0574151	0.206406	-0.0457591
55	36.85	0	0.00275977	0.00747065	-0.00763667	0.0366678	-0.0121092	-0.0285998	-0.209308	0.104995	-0.03177	-0.0237007	-0.029982	0.129678	0.0783052	0.0174467	0.000887844	0.0721745	0.221732	-0.0448767
56	37.52	0	-0.00940467	0.0689573	-0.0236179	-0.0098913	-0.00542316	-0.0801602	-0.0749274	0.0338882	0.00238423	-0.0104054	-0.0344534	0.0557163	-0.0322037	0.0376505	-0.000514026	0.0942755	0.239222	0.00461505
57	38.19	0	-0.0182076	-0.0171912	-0.0802789	-0.0301106	0.0286627	-0.121735	-0.0117136	0.00493774	-0.0909956	0.0140581	0.0334223	0.0915003	0.0295995	-0.0351507	0.0239781	0.019971	0.131617	0.0212347
58	38.86	0	0.026705	0.000292466	-0.0709218	0.057191	-0.0676798	-0.0795572	-0.0599441	0.130383	-0.0899902	0.0633031	-0.0218682	0.0776428	-0.00227563	-0.0263001	-0.0150385	-0.00328309	0.139657	-0.0351126
59	39.53	0	-0.0272272	-0.0561341	-0.04025	0.00543282	-0.0513588	-0.0151396	0.104372	0.165136	0.0818802	0.0650777	0.0101867	0.0290008	0.00851793	0.0349135	-0.0307804	0.0598159	0.13811	0.0605419
60	40.2	0	-0.0310656	-0.029385	-0.0197073	0.0356285	-0.0177171	-0.0458825	0.0570101	0.0303641	0.0326805	-0.00330077	0.0023304	0.0995022	-0.00753866	-0.0575706	0.00644099	0.0393862	0.171961	-0.0313151
61	40.87	0	-0.0148803	-0.0320495	-0.0226111	-0.0415769	0.0168809	0.00608958	-0.0961858	-0.0080728	-0.063229	0.0466893	0.0446259	0.0544602	-0.0391929	-0.0723181	-0.00467577	0.0192565	0.168324	0.0713335
62	41.54	0	-0.0557775	0.00307493	-0.0284293	-0.0423012	-0.105861	0.0444781	-0.162425	0.0704955	0.0606327	0.0550206	0.000801366	-0.0136036	-0.0582363	-0.0725987	-0.0718837	0.00246932	0.238251	-0.0123993
63	42.21	0	-0.0732343	0.00550854	-0.0235642	0.0370734	0.0197316	-0.00514077	-0.112195	0.112848	-0.0706111	0.0461788	-0.036815	0.00470779	-0.0680991	-0.0802727	0.0336954	0.0422541	0.0677391	0.0718649
64	42.88	0	-0.00976369	0.0247505	-0.00501425	0.00658319	-0.0250359	0.0241962	0.0825958	0.0982964	0.00113425	0.0873542	0.0324405	0.014675	-0.0137253	-0.0669772	0.00633426	0.0453875	0.173054	0.0546627
65	43.55	0	-0.0641324	-0.0264085	-0.0119392	0.0180827	-0.0539705	0.0315853	0.0161412	0.122067	-0.00376853	0.0659341	-0.130002	-0.0197791	-0.0389418	0.0151237	-0.00624817	0.00195185	0.235685	0.0245914
66	44.22	0	-0.00971964	-0.0331628	-0.0176961	0.0655054	-0.106674	0.0615752	0.153307	0.0848472	-0.0114205	0.0879769	0.000614663	-0.0127833	-0.00747276	-0.029476	0.00338933	0.0213978	0.187532	0.0490172
67	44.89	0	-0.0121091	-0.02077	-0.0082689	0.0199492	-0.139534	-0.0448791	0.00373579	0.106089	-0.0194328	0.0476751	0.0575013	-0.0312446	0.0348717	-0.0564673	-0.0380507	-0.0180131	0.128605	0.0144603
68	45.56	0	-0.0617439	-0.0480068	-0.00112367	0.079143	-0.0523	-0.0164437	0.0365411	0.0663464	-0.072005	0.029781	0.11039	0.0404712	-0.0489478	-0.00217978	-0.0238828	0.0233782	0.171868	-0.0633091
69	46.23	0	-0.00609765	0.0167446	-0.0242032	0.0154038	-0.0461061	0.00273056	-0.0874449	0.105877	-0.0765879	0.126971	0.013107	0.0571215	-0.0289432	-0.0524708	0.00424414	0.0359105	0.223789	-0.0666776
70	46.9	0	-0.0496459	-0.0213257	-0.0103939	0.0699025	-0.107936	0.0508049	-0.0610945	0.0567956	0.0303196	0.0686872	0.0676636	0.0158923	-0.00906906	-0.0132384	-0.0553362	-0.0131791	0.214227	-0.037381
71	47.57	0	0.0178053	0.0123738	-0.0265599	-0.0440796	-0.126381	0.0256522	0.0423836	0.115001	0.097528	0.0290389	0.0804092	0.0757363	-0.0325742	-0.027489	0.0762462	0.0524637	0.275754	-0.0188654
72	48.24	0	-0.0427262	-0.0367727	-0.0297919	0.0638926	-0.0942992	0.0445401	0.0137555	0.149396	0.131384	0.00474147	0.0513358	0.0813088	0.0363264	-0.021771	0.00358233	0.0986289	0.195731	0.0974089
73	48.91	0	-0.0700259	-0.00597421	-0.012635	0.0611438	-0.122268	0.0219725	0.0995519	0.150071	-0.142044	0.0195982	0.0415201	0.0310868	-0.00806715	-0.0195609	0.00706771	0.0653833	0.18742	-0.0104275
74	49.58	0	-0.0513709	0.0100706	-0.0408405	0.106864	-0.0963892	0.0398139	0.0594078	0.102836	-0.0228105	0.0253257	0.0531567	-0.0515902	0.0248225	0.0611858	0.0081499	0.0501238	0.303706	0.0650425
75	50.25	0	0.0059536	-0.0197005	-0.0227759	0.103484	-0.134637	0.0543045	-0.0848924	0.0893936	-0.0312334	0.0654507	0.11429	0.00424493	0.0327349	-0.00333019	0.0119802	0.0120938	0.300144	0.0458813
76	50.92	0	-0.0123725	-0.0462339	0.000682458	0.113019	-0.0965343	-0.00862296	-0.0619963	0.119935	0.148198	7.32916e-05	0.0600028	0.0840565	-0.000502472	-0.0299442	0.0523812	0.0154469	0.20296	0.060098
77	51.59	0	-0.0361983	0.0208834	0.0194111	0.0706299	-0.0612773	-0.0304083	0.0148437	0.0482009	-0.086523	0.0443306	0.0604841	0.0189193	0.0743563	-0.0553184	-0.026382	0.0181749	0.294945	-0.0107337
78	52.26	0	0.0252698	0.0108373	-0.00789754	0.0834013	-0.0380692	-0.0434151	-0.126854	0.0699027	-0.0654922	0.0238122	0.0318728	0.0549872	-0.0490476	-0.0734286	-0.0273369	0.0734373	0.181461	-0.0346954
79	52.93	0	-0.00693265	0.0208202	-0.0164497	-0.0155439	-0.055174	-0.0885822	-0.00423234	-0.0161667	0.0092091	0.00557123	0.0103203	0.0205067	-0.00317413	-0.0837357	-0.0553058	0.0601146	0.163714	-0.0425538
