# Supplementary material for: Taste quality and hunger interactions in a feeding sensorimotor circuit
Source: eLife. 2022 Jul 6;11:e79887. doi: 10.7554/eLife.79887 (PMC9292995; doi:10.7554/eLife.79887)
Supplement: Figure 4—source data 1. [file elife-79887-fig4-data1.xlsx]

## Sheet: Figure 5
	Sugar GRNs Food-deprived Light intensity 1	Sugar GRNs Fed Light intensity 1	Sugar GRNs Food-deprived Light intensity 2	Sugar GRNs Fed Light intensity 2	Sugar GRNs Food-deprived Light intensity 3	Sugar GRNs Fed Light intensity 3	Sugar GRNs Food-deprived Light intensity 4	Sugar GRNs Fed Light intensity 4	MN9 Food-deprived Light intensity 1	MN9 Fed Light intensity 1	MN9 Food-deprived Light intensity 2	MN9 Fed Light intensity 2	MN9 Food-deprived Light intensity 3	MN9 Fed Light intensity 3	MN9 Food-deprived Light intensity 4	MN9 Fed Light intensity 4	Zorro Food-deprived Light intensity 1	Zorro Fed Light intensity 1	Zorro Food-deprived Light intensity 2	Zorro Fed Light intensity 2	Zorro Food-deprived Light intensity 3	Zorro Fed Light intensity 3	Zorro Food-deprived Light intensity 4	Zorro Fed Light intensity 4	Clavicle Food-deprived Light intensity 1	Clavicle Fed Light intensity 1	Clavicle Food-deprived Light intensity 2	Clavicle Fed Light intensity 2	Clavicle Food-deprived Light intensity 3	Clavicle Fed Light intensity 3	Clavicle Food-deprived Light intensity 4	Clavicle Fed Light intensity 4	G2N-1 Food-deprived Light intensity 1	G2N-1 Fed Light intensity 1	G2N-1 Food-deprived Light intensity 2	G2N-1 Fed Light intensity 2	G2N-1 Food-deprived Light intensity 3	G2N-1 Fed Light intensity 3	G2N-1 Food-deprived Light intensity 4	G2N-1 Fed Light intensity 4	Rattle Food-deprived Light intensity 1	Rattle Fed Light intensity 1	Rattle Food-deprived Light intensity 2	Rattle Fed Light intensity 2	Rattle Food-deprived Light intensity 3	Rattle Fed Light intensity 3	Rattle Food-deprived Light intensity 4	Rattle Fed Light intensity 4	Usnea Food-deprived Light intensity 1
Number of flies extending proboscis	25	1	53	10	57	13	80	44	8	6	48	48	48	49	46	48	2	8	29	29	33	34	38	46	9	0	36	7	54	14	67	24	0	0	58	27	89	66	100	88	1	3	30	32	34	35	46	47	0
Number of flies that did not extend proboscis	58	78	30	69	26	66	3	35	42	44	2	2	2	1	4	2	48	50	21	29	17	24	12	12	93	109	66	102	48	95	35	85	103	90	45	63	14	24	3	2	46	44	17	15	13	12	1	0	53
[truncated: 47 more columns]
