# Supplementary material for: Taste quality and hunger interactions in a feeding sensorimotor circuit
Source: eLife. 2022 Jul 6;11:e79887. doi: 10.7554/eLife.79887 (PMC9292995; doi:10.7554/eLife.79887)
Supplement: Figure 5—source data 1. [file elife-79887-fig5-data1.xlsx]

## Sheet: 20211027_SS47082_Opto
Responses of G2N-1 (SS47082) to optogenetic activation of GRNs in fed animals				Gr5a-LexA								Gr5a-LexA plus Gr66a-LexA								Gr66a-LexA
Frame	Time (seconds)	660 nm light ON		SS47082_Gr5a_Fly1	SS47082_Gr5a_Fly2	SS47082_Gr5a_Fly3	SS47082_Gr5a_Fly4	SS47082_Gr5a_Fly5	SS47082_Gr5a_Fly6	SS47082_Gr5a_Fly7		SS47082_Gr5a-Gr66a_Fly1	SS47082_Gr5a-Gr66a_Fly2	SS47082_Gr5a-Gr66a_Fly3	SS47082_Gr5a-Gr66a_Fly4	SS47082_Gr5a-Gr66a_Fly5	SS47082_Gr5a-Gr66a_Fly6	SS47082_Gr5a-Gr66a_Fly7		SS47082_Gr66a_Fly1	SS47082_Gr66a_Fly2	SS47082_Gr66a_Fly3	SS47082_-Gr66a_Fly4	SS47082_Gr66a_Fly5	SS47082_Gr66a_Fly6
0	0	0		-0.0274688	0.0064176	0.0605896	0.00462216	0.0628779	0.0383469	0.00686606		0.00564515	0.0089243	-0.0730667	-0.0416423	-0.11083	-0.00768422	-0.00620377		0.0460973	0.0901444	-0.0174207	0.00543192	-0.0718627	-0.00444225
1	0.67	0		-0.027586	0.00332245	-0.0340575	-0.0270798	0.0290977	0.0454876	0.0160291		-0.0641095	-0.0503507	-0.0974823	-0.0410335	-0.104066	0.0619806	-0.0170306		0.040359	-0.0306389	0.0235581	-0.0200411	-0.0599008	0.0670333
2	1.34	0		0.00908865	-0.0842592	0.0574517	0.0106653	-0.1173	-0.0367522	-0.0089867		0.0363328	-0.0465656	0.0328244	-0.0528278	-0.00153812	-0.015409	-0.0711149		-0.123465	-0.115148	0.0185406	-0.0765874	-0.0739501	-0.0474407
3	2.01	0		-0.00457127	-0.0513828	-0.033799	0.0612867	0.0146655	-0.0244787	0.0404551		0.0952388	0.0477125	0.0362153	0.0543053	0.0106901	0.0159051	-0.020788		-0.0739157	-0.0866099	0.041325	-0.00834461	0.0383289	-0.0902999
4	2.68	0		0.0157584	0.0200079	-0.000736375	0.018249	-0.0213285	-0.0399394	-0.0107225		0.0654218	0.038213	-0.0366582	-0.0253697	0.00103112	-0.00559388	0.0109064		-0.0327001	-0.0135404	-0.0319649	-0.0122725	-0.0601703	-0.0672295
5	3.35	0		-0.0050892	0.0948973	-0.024207	0.00543899	-0.0494499	0.0575933	0.0441431		0.00530453	0.0590903	-0.0596093	0.0514336	-0.0624322	-0.00165591	-0.0719825		0.0306407	-0.0360561	0.0452598	-0.00391369	0.0715811	0.055665
6	4.02	0		-0.0407026	-0.0284807	0.0182174	0.0799225	-0.085027	-0.0227834	-0.000220998		-0.0885637	0.0153262	0.0479988	-0.0413389	-0.0236454	0.0485985	0.0731645		-0.0688376	0.01436	0.00650996	-0.0794733	0.0157987	-0.0148678
7	4.69	0		0.00230207	-0.0185611	0.0851677	0.00844954	-0.0430489	0.0214947	-0.0215895		0.0713	0.0126848	0.00298342	0.0260907	0.0720237	0.0267176	0.0573966		0.0824798	0.0651251	0.0255879	-0.032896	0.0609508	-0.073097
8	5.36	0		-0.0138458	0.0928067	-0.0787107	-0.0122139	-0.0109396	0.0213762	-0.015601		-0.0306928	0.0219017	0.0855817	0.0162687	0.0440583	-0.00277564	0.028697		0.00320096	0.0532294	-0.0548746	0.0108354	0.119172	-0.0745667
9	6.03	0		0.0721389	-0.0125594	0.00611466	-0.0323006	0.0653584	-0.0230993	-0.0664214		-0.0686868	-0.00653181	0.0607653	-0.02268	0.127263	0.0221678	-0.00281324		0.0501468	-0.0154049	0.0131166	0.00235744	-0.0574754	-0.0663842
10	6.7	0		0.0476133	-0.00574626	-0.0281421	-0.0401076	0.0823377	-0.0118973	-0.0745375		-0.0222543	-0.0935987	0.00685407	0.0245589	0.053547	-0.0278312	0.0289935		0.101348	0.0999755	-0.010963	0.0256435	0.110735	0.0357905
11	7.37	0		0.000189294	-0.0291633	0.085647	-0.0629698	0.0471526	0.00529052	0.00353667		0.142942	0.0277291	-0.0414974	0.0837059	-0.0300526	-0.0343635	0.0206621		0.0556552	0.0983023	-0.00314299	0.0382993	0.00791041	0.115935
12	8.04	0		0.00653011	0.0496749	0.0474906	0.0457081	0.0401301	0.0025507	0.0402122		-0.0481594	0.00586144	0.0659599	-0.0079938	0.0286404	-0.05144	-0.0126323		-0.0403199	-0.0754138	-0.0220531	0.149411	-0.0489069	0.0885675
13	8.71	0		-0.0343569	-0.036974	-0.161026	-0.0596706	-0.0145261	-0.0331895	0.0468374		-0.0997185	-0.0403967	-0.030869	-0.0234769	-0.00468947	-0.0286163	-0.0172549		-0.0706893	-0.0483247	-0.0334787	0.00154996	-0.0522104	0.0753368
14	9.38	1		-0.0201759	-0.0559919	-0.0917921	0.0114185	0.0323945	0.007592	0.0680587		0.097536	0.00616864	0.0379437	0.0491845	0.0290371	-0.0297836	0.0189719		0.0279004	0.0655092	0.0219198	0.0083267	-0.0355312	-0.00352913
15	10.05	1		1.75807	2.28568	1.42248	2.259	2.27502	2.16052	1.92953		2.03615	2.36273	2.1524	1.98629	2.11833	2.22143	2.53565		-0.0332177	0.124908	0.0691141	0.0120509	-0.0883987	0.0753263
16	10.72	1		2.01378	2.56135	1.89839	2.75779	2.27988	2.64655	2.64615		2.01385	2.78895	2.64099	2.39427	2.50053	2.82803	3.25857		-0.089564	-0.151082	-0.0658181	-0.000739469	0.0518259	0.0828002
17	11.39	1		1.9894	2.32054	1.87007	2.68719	2.29508	2.60073	2.52485		2.01981	2.64035	2.5012	2.12796	2.1302	2.47712	2.99333		0.0282386	0.0509105	-0.0458475	-0.0546937	0.00625854	0.141556
18	12.06	0		2.01226	2.21147	2.00906	2.51166	2.35504	2.29352	2.4868		1.64259	2.28111	2.34277	2.0436	2.09743	2.17057	2.87372		0.0108812	0.0345818	-0.0111888	-0.0572049	-0.0279864	0.261566
19	12.73	0		1.77054	1.99434	1.52511	2.32405	2.13998	2.03408	2.19969		1.28419	1.93269	2.00667	1.68814	1.82429	1.77649	2.4483		0.140878	0.099582	0.0544851	-0.109714	-0.0286509	0.0731134
20	13.4	0		1.58421	1.57901	1.50797	2.07867	1.96738	1.8245	1.83865		1.11092	1.39062	1.65019	1.41639	1.55243	1.4496	2.14782		-0.0463166	0.107873	-0.011338	-0.085019	-0.107572	0.00577434
21	14.07	0		1.34541	1.46517	1.10728	1.63248	1.67049	1.46812	1.5418		0.854162	1.23898	1.45432	1.11962	1.26758	1.23113	1.97408		0.0776371	0.106244	0.0297475	-0.00271571	-0.00630946	-0.0500448
22	14.74	0		1.20279	1.32951	1.08389	1.48408	1.4733	1.2574	1.33562		0.70325	0.950211	1.11222	1.02076	1.0673	1.01298	1.72956		-0.0367215	0.0701339	0.06192	0.0634157	-0.207636	-0.0642255
23	15.41	0		1.10185	1.14586	0.805976	1.30202	1.41327	1.1301	1.1959		0.456521	0.991831	0.953957	0.796358	0.796196	0.890059	1.51362		0.0593684	0.113859	0.032791	-0.0115738	0.0137183	-0.0177009
24	16.08	0		0.904926	0.989302	0.708702	1.21708	1.25089	0.996786	1.00729		0.385332	0.776507	0.890621	0.695289	0.661051	0.683994	1.41562		0.024445	-0.0222143	-0.0216741	-0.0371935	-0.0657397	-0.0767009
25	16.75	0		0.837955	0.927154	0.593164	1.08137	1.02901	0.845362	0.825524		0.442273	0.713911	0.751834	0.5929	0.649217	0.663965	1.30164		0.0140208	-0.040829	0.0221935	0.045643	-0.0299646	0.0765004
26	17.42	0		0.646409	0.750589	0.451645	0.881576	0.962935	0.81135	0.777769		0.316675	0.607291	0.714296	0.533104	0.492065	0.570537	1.06089		-0.0529073	0.149859	-0.020693	-0.0504898	0.0747015	0.145357
27	18.09	0		0.592683	0.625273	0.28926	0.861375	0.941539	0.742314	0.629778		0.258583	0.590228	0.488482	0.453667	0.546229	0.590814	0.930578		-0.0905703	0.176414	-0.0478633	-0.0652479	0.00847181	0.171845
28	18.76	0		0.536089	0.552264	0.372153	0.808786	0.739372	0.628524	0.553		0.184045	0.540856	0.53289	0.42947	0.490958	0.456919	0.843483		-0.067111	0.139919	-0.0144973	0.0314543	-0.0925502	0.0809009
29	19.43	0		0.551214	0.545228	0.317124	0.646814	0.782122	0.576299	0.540341		0.194042	0.458162	0.477038	0.497959	0.359934	0.376077	0.736181		0.0244308	0.105725	0.0257756	0.0396632	-0.0610264	-0.0571733
30	20.1	0		0.463144	0.485531	0.343446	0.709228	0.670428	0.564322	0.526882		0.287114	0.456298	0.464732	0.357727	0.308499	0.413122	0.517335		-0.0754863	0.122829	-0.00351312	0.0654998	-0.0329279	0.141203
31	20.77	0		0.467526	0.464127	0.323855	0.649191	0.63276	0.51872	0.43079		0.164546	0.392052	0.370926	0.360202	0.344396	0.362767	0.683974		0.0388979	0.0199541	-0.0733009	-0.0168708	0.0511912	0.0068974
32	21.44	1		0.381991	0.407734	0.355074	0.56135	0.653733	0.471776	0.398471		0.219936	0.321022	0.40611	0.344509	0.205621	0.384259	0.532148		0.134293	-0.017737	-0.0489639	-0.0411734	-0.0632935	-0.0589726
33	22.11	1		1.69924	1.89641	1.54118	2.1982	2.1039	1.75333	1.37756		1.59105	1.67368	2.14211	1.68384	1.75883	1.47968	2.79992		0.152922	0.109896	0.00384764	-0.0391156	0.10748	0.223296
34	22.78	1		1.91458	2.39204	2.27137	2.75576	2.71864	2.29832	2.34851		1.69504	2.49931	2.62722	2.16945	2.1692	1.91104	3.20243		0.0423831	-0.0894722	-0.0384219	-0.0210944	-0.0242774	0.0441713
35	23.45	1		1.67811	1.8971	1.90671	2.27946	2.51717	1.76727	1.91119		1.38846	2.02066	2.09799	1.60225	1.53616	1.35733	2.81266		-0.00882095	0.0607326	0.0720309	0.0305099	-0.0837585	-0.102696
36	24.12	0		1.4024	1.55484	1.686	1.97329	2.07306	1.38389	1.52653		0.964003	1.54611	1.6685	1.32615	1.25307	1.09702	2.48308		0.0951547	-0.0895685	0.0737359	0.0775725	-0.0700989	0.013296
37	24.79	0		1.18609	1.13447	1.28179	1.52129	1.98428	0.974163	1.1207		0.767745	1.27564	1.35782	1.11601	0.813137	0.879394	2.00278		0.105963	0.125124	0.0744453	-0.0422217	-0.0883569	-0.0205478
38	25.46	0		0.98337	1.00295	1.00944	1.1324	1.59118	0.798447	0.822003		0.551585	1.00704	1.06703	0.851903	0.797317	0.703183	1.65218		0.0806401	-0.0088757	0.00777134	0.017745	-0.0711552	0.0337428
39	26.13	0		0.778201	0.876248	0.776488	0.90673	1.37321	0.719653	0.750086		0.471723	0.908197	0.927083	0.710608	0.637869	0.55418	1.37157		0.00994164	0.00343947	0.0546536	-0.024417	-0.115158	0.0504451
40	26.8	0		0.72942	0.690801	0.756922	0.799961	1.15453	0.561831	0.730502		0.425623	0.777965	0.763634	0.607837	0.54113	0.52016	1.23955		0.105804	-0.0181162	0.0501952	0.0294761	-0.158879	-0.0767609
41	27.47	0		0.599582	0.553341	0.558106	0.8478	0.866475	0.674624	0.650108		0.288013	0.631588	0.751771	0.544637	0.445674	0.497077	0.998949		-0.0591938	-0.127391	-0.0138563	-0.0671512	-0.00161948	0.0995791
42	28.14	0		0.515492	0.510309	0.421156	0.653887	0.927367	0.612616	0.593438		0.328295	0.638842	0.633538	0.54915	0.38476	0.516013	0.937682		0.0100161	0.110512	0.0318163	0.0377296	0.00153754	0.0654566
43	28.81	0		0.537942	0.47113	0.444605	0.62265	0.787758	0.59214	0.463664		0.255306	0.631052	0.516767	0.468859	0.376846	0.420063	0.868735		-0.112553	-0.0462681	0.03668	-0.00682611	-0.0913995	0.102591
44	29.48	0		0.39855	0.434473	0.396524	0.541652	0.586957	0.573033	0.461808		0.250769	0.4854	0.499105	0.391693	0.366504	0.407649	0.702615		0.0957605	0.0573357	0.00502495	-0.00332648	-0.104775	-0.0567515
45	30.15	0		0.357288	0.446722	0.436294	0.538205	0.537626	0.462634	0.407861		0.374556	0.42401	0.394412	0.348582	0.326291	0.426486	0.66898		0.0243431	-0.0581309	0.0602517	-0.0197183	-0.0732645	-0.114622
46	30.82	0		0.337289	0.426579	0.341892	0.448692	0.529464	0.382401	0.352678		0.204519	0.366801	0.435355	0.348398	0.243188	0.366325	0.643981		-0.109068	0.00772888	0.0192361	-0.0703353	0.0322246	0.0405348
47	31.49	0		0.301905	0.37931	0.357375	0.412713	0.409948	0.344147	0.395992		0.269687	0.361271	0.317255	0.244304	0.295842	0.287573	0.545395		0.00086163	-0.0602555	0.016491	0.000754552	0.00857073	0.047093
48	32.16	0		0.206638	0.273934	0.200808	0.403238	0.4939	0.368519	0.315704		0.157833	0.270433	0.340085	0.274748	0.252022	0.225737	0.646261		0.00098991	-0.133897	0.0595266	0.0429703	-0.068048	0.0748208
49	32.83	0		0.204649	0.230616	0.223608	0.326905	0.388907	0.259208	0.211696		0.170838	0.248442	0.307818	0.237135	0.255102	0.299057	0.433383		-0.0655783	-0.133152	0.030332	-0.00899125	-0.114603	0.0621646
50	33.5	1		0.187633	0.302581	0.247509	0.373279	0.356117	0.277082	0.339019		0.134844	0.16859	0.331301	0.286425	0.158208	0.203514	0.411346		-0.0986553	-0.0687959	0.0371449	-0.0189483	-0.0103138	0.0800355
51	34.17	1		1.56691	1.88941	1.44968	1.56468	1.97546	1.66312	1.06251		1.3476	1.48309	1.80504	1.14162	1.25373	0.978247	2.3101		-0.0840667	0.0821722	-0.0176099	0.0810858	0.0409389	0.0856659
52	34.84	1		1.94473	2.22203	1.97007	1.96757	2.47299	2.14293	1.97502		1.46162	2.16831	2.11131	1.56543	1.48782	1.16356	3.04639		-0.107206	-0.213166	-0.0553614	-0.0590257	-0.245758	0.11235
53	35.51	1		1.61661	1.89233	1.8585	1.26984	2.09247	1.74336	1.46281		1.03961	1.54578	1.5473	1.06298	1.03711	0.788155	2.36005		-0.14105	-0.0141375	-0.00271677	0.0226205	-0.0855516	0.290871
54	36.18	0		1.37472	1.44457	1.31448	1.09873	1.86706	1.30827	1.20545		0.617141	1.1421	1.26313	0.79319	0.764326	0.60958	2.03064		-0.0787348	0.0105082	0.0247908	0.000971236	-0.0622538	0.296386
55	36.85	0		1.01173	1.12914	1.10875	0.842939	1.40805	1.00233	0.937347		0.634927	0.89022	0.93266	0.62543	0.556829	0.478286	1.60896		0.109707	0.153008	0.0897385	-0.0269571	0.0054928	0.0849113
56	37.52	0		0.853677	0.888376	0.933101	0.684044	1.13494	0.808736	0.74425		0.285503	0.662035	0.736265	0.525295	0.468453	0.440004	1.26077		0.0630106	0.0157118	0.0976416	0.00033563	0.00633802	-0.0272678
57	38.19	0		0.721606	0.740753	0.790884	0.651723	0.906611	0.73997	0.671445		0.290274	0.572402	0.709101	0.468643	0.396833	0.359288	1.1518		-0.0704693	-0.122189	0.036823	0.00515183	0.0497582	0.0750998
58	38.86	0		0.612674	0.697908	0.613865	0.561956	0.720934	0.621584	0.605692		0.207688	0.595192	0.59078	0.373205	0.421564	0.363744	0.895389		-0.10839	0.0185629	0.0566277	0.00815603	0.0849708	0.170057
59	39.53	0		0.520122	0.598117	0.551492	0.478303	0.783438	0.539075	0.521612		0.326041	0.537715	0.571479	0.274882	0.301093	0.374658	0.765019		-0.0743672	-0.0238656	0.034637	-0.00925114	0.035451	0.132782
60	40.2	0		0.478839	0.569044	0.36671	0.383018	0.639782	0.528486	0.436105		0.373195	0.427243	0.366457	0.227446	0.291555	0.24958	0.654685		-0.144227	-0.0117516	0.0194008	0.0949576	-0.00895236	0.154287
61	40.87	0		0.368235	0.430242	0.469848	0.401964	0.634769	0.484391	0.453684		0.248232	0.400356	0.42073	0.259383	0.282312	0.3445	0.674451		0.0335728	-0.0360454	0.0595316	0.0441569	0.0554609	0.145836
62	41.54	0		0.375195	0.415384	0.26225	0.417153	0.621442	0.358769	0.38366		0.0934565	0.420015	0.495521	0.222758	0.202875	0.229734	0.670592		-0.0685667	-0.0670872	0.108316	0.101647	-0.0189118	0.138593
63	42.21	0		0.37125	0.397761	0.365387	0.388712	0.551059	0.393318	0.309488		0.163593	0.367349	0.453316	0.200934	0.22445	0.201027	0.636748		-0.0335091	0.0761602	0.101325	0.0415845	0.0702801	0.0961895
64	42.88	0		0.247769	0.27805	0.27519	0.319567	0.497473	0.373726	0.350691		0.104693	0.285019	0.387083	0.225408	0.176538	0.232319	0.697754		0.0240864	0.0472557	0.0669543	-0.0515065	-0.0846786	-0.052163
65	43.55	0		0.278051	0.25597	0.374799	0.29345	0.446059	0.350194	0.275306		0.0522639	0.259023	0.243232	0.122474	0.321903	0.166006	0.614692		-0.0077523	-0.0513669	0.0630823	0.113086	-0.0361209	0.192515
66	44.22	0		0.176817	0.233607	0.315065	0.328128	0.301263	0.261135	0.233902		0.0131254	0.27776	0.292344	0.148328	0.216908	0.236417	0.543344		-0.106805	-0.00295191	0.00727326	0.0657643	-0.00896997	0.148903
67	44.89	0		0.101571	0.19923	0.175238	0.28783	0.444168	0.238424	0.257059		0.146089	0.235042	0.203259	0.142953	0.207267	0.193093	0.456431		-0.00301659	0.00318718	-0.0549939	0.0157877	0.0181129	0.0416779
68	45.56	0		0.123457	0.187421	0.313117	0.202083	0.359478	0.283645	0.119837		0.0216352	0.178116	0.222669	0.159825	0.203734	0.224162	0.418242		-0.0739654	-0.00391647	-0.0325098	-0.0436526	0.107414	0.0244783
69	46.23	0		0.112078	0.256712	0.0432883	0.214039	0.267574	0.213658	0.128954		0.0933034	0.0595633	0.194087	0.151437	0.136662	0.204631	0.440673		-0.0524339	-0.0837719	-0.0526859	0.0173841	0.00128841	0.274767
70	46.9	0		0.0937949	0.163592	0.163429	0.201108	0.234723	0.130958	0.190126		-0.060216	0.0445008	0.120474	0.101899	0.0797232	0.106955	0.440151		0.0342192	0.117923	-0.0266245	-0.0984943	0.339569	0.121415
71	47.57	0		0.089677	0.104689	0.0790728	0.115022	0.225091	0.15769	0.146181		0.0888949	0.0527592	0.216278	0.126396	0.189069	0.112782	0.370506		-0.0525118	0.13142	-0.00749699	0.0896413	0.165668	-0.0390746
72	48.24	0		0.0821932	0.142622	0.0598665	0.137253	0.14468	0.11892	0.125993		0.00683961	0.164634	0.0839411	0.106664	0.0982023	0.077284	0.310221		-0.096926	-0.0578776	-0.0139818	0.00128205	0.175662	0.158053
73	48.91	0		0.106175	0.156861	0.192587	0.272112	0.132688	0.157417	0.085932		-0.0768238	0.121646	0.034715	0.173242	0.124416	0.11986	0.362198		-0.0498218	0.00598373	0.017844	-0.00714343	0.0100722	0.081858
74	49.58	0		0.0944601	0.115155	0.176038	0.184199	0.193735	0.154711	0.0822436		0.0875711	0.0799482	0.107098	0.103525	0.0818706	0.127732	0.320502		-0.0722981	-0.140626	0.0516984	0.0153972	0.134484	0.25224
75	50.25	0		0.0713948	0.108065	0.113326	0.088764	0.135858	0.178365	0.122783		0.0860581	0.134683	0.0878056	0.123138	0.126165	0.155251	0.360169		0.14342	-0.0266028	0.0779743	-0.00817779	0.0531545	-0.0170787
76	50.92	0		0.0465773	0.112038	0.137062	0.174695	0.0745673	0.147879	0.0888054		0.0874183	0.127263	0.0365118	0.00609757	0.111497	0.145953	0.227491		-0.124459	-0.0897401	0.00217673	-0.0565623	0.105652	0.10228
77	51.59	0		0.0358848	0.0983775	0.231149	0.176168	0.0828374	0.0909298	0.0944554		-8.88299e-05	0.0799265	0.0797185	0.105981	0.136524	0.115693	0.227816		0.0754037	-0.0720059	0.00843084	-0.00387031	0.0231163	0.0608953
78	52.26	0		0.0200446	0.0569346	0.146838	0.221186	0.164272	0.123186	0.0261363		-0.0797832	0.0583504	0.154081	0.0962869	0.160771	0.105813	0.299476		-0.0695305	-0.0425075	0.0409197	-0.0689115	-0.0224866	-0.00248166
79	52.93	0		0.00507518	0.0774804	0.0201727	0.187127	0.240339	0.127241	0.0857881		0.0561881	0.0269692	0.0595383	0.0875335	0.00553658	0.174621	0.170722		-0.0246192	-0.0144055	0.139715	-0.0488776	-0.0107111	0.247114

## Sheet: 20211028_SS47744_Opto
Responses of Roundup (SS47744) to optogenetic activation of GRNs in fed animals				Gr5a-LexA								Gr5a-LexA plus Gr66a-LexA									Gr66a-LexA
Frame	Time (seconds)	660 nm light ON		SS47744_Gr5a_Fly1	SS47744_Gr5a_Fly2	SS47744_Gr5a_Fly3	SS47744_Gr5a_Fly4	SS47744_Gr5a_Fly5	SS47744_Gr5a_Fly6	SS47744_Gr5a_Fly7		SS47744_Gr5a-Gr66a_Fly1	SS47744_Gr5a-Gr66a_Fly2	SS47744_Gr5a-Gr66a_Fly3	SS47744_Gr5a-Gr66a_Fly4	SS47744_Gr5a-Gr66a_Fly5	SS47744_Gr5a-Gr66a_Fly6	SS47744_Gr5a-Gr66a_Fly7	SS47744_Gr5a-Gr66a_Fly8		SS47744_Gr66a_Fly1	SS47744_Gr66a_Fly2	SS47744_Gr66a_Fly3	SS47744_-Gr66a_Fly4	SS47744_Gr66a_Fly5	SS47744_Gr66a_Fly6
0	0	0		-0.106508	-0.12194	-0.03541	0.0366517	-0.00137838	0.0376509	0.0701277		0.0833374	-0.039254	0.0779742	-0.0263704	-0.102511	0.0908441	-0.0225719	-0.00448355		0.034341	0.0133349	0.0186597	-0.114782	-0.113004	0.171341
1	0.67	0		0.0304029	-0.0707706	-0.0315145	-0.0501199	-0.11698	-0.0288399	0.0524642		0.0760554	-0.0397709	0.113636	-0.0347022	0.0406589	-0.00788704	-0.0469248	0.0192869		0.0401888	-0.000517728	0.0327785	0.041169	-0.0196858	-0.0241195
2	1.34	0		0.10211	0.0422375	-0.0449776	0.00901689	-0.0781387	-0.100002	-0.0111838		-0.156276	-0.0764055	-0.0256367	-0.00231739	-0.069469	0.118478	-0.0303136	0.0163841		-0.0248879	-0.0177636	-0.00819441	-0.0552469	-0.0545122	-0.0241298
3	2.01	0		0.0649626	0.0734695	0.0291443	-0.00476506	0.00371911	0.0817789	-0.0138316		-0.170849	-0.078121	-0.0401662	0.0709771	0.00251266	-0.288352	0.0207382	-0.0316995		0.0435086	0.065264	0.0842623	0.0233818	-0.0513017	-0.0960186
4	2.68	0		-0.110759	-0.0154566	0.0169667	-0.0133293	0.177571	0.0569022	-0.0147249		-0.0332078	0.0116541	-0.0758763	0.0382308	0.00263884	-0.138796	-0.089284	-0.02209		-0.18227	0.120878	0.0428347	-0.0251889	0.0907905	-0.0515655
5	3.35	0		-0.0889266	-0.0526251	0.00354196	0.00346042	-0.111067	-0.00328892	0.0157885		0.0423834	-0.00745045	-0.0254127	0.0709212	-0.0156588	0.0565958	-0.0297592	0.0341415		-0.0578586	0.0245312	0.0532845	0.00127368	0.0261028	-0.124001
6	4.02	0		0.0188456	0.0497048	-0.0269505	-0.0183448	0.0322636	-0.0694665	0.00816272		0.0938432	-0.0180324	-0.013976	0.035894	0.0782092	0.17972	-0.0228341	-0.0631438		0.0421236	-0.0542581	0.0507091	0.0648467	-0.0610516	0.0499646
7	4.69	0		0.0780514	0.00181148	0.00725656	0.0428487	-0.0144746	-0.0124704	-0.0606569		-0.0226065	0.0307005	-0.0120626	-8.1034e-05	0.055418	0.0862471	-0.0236351	0.0637315		0.0146122	0.0206462	-0.0061061	-0.0163966	0.0532931	0.0138249
8	5.36	0		-0.171272	-0.0273763	0.00664888	-0.00216705	-0.011857	-0.0141289	-0.0103896		0.0843868	0.0127291	-0.0459967	-0.0526401	-0.0174065	0.0326477	0.00419059	-0.00142304		-0.0187205	-0.02219	-0.0499464	0.0288377	-0.0459597	0.0636031
9	6.03	0		0.040251	-0.0704905	0.0296528	0.0305197	-0.00435797	0.0262987	0.000993072		-0.0729215	0.0689644	0.0533708	-0.0641347	0.0862181	0.117604	0.0698981	0.0326025		0.0457061	-0.0417962	0.0477098	-0.0161807	-0.00831978	-0.0160501
10	6.7	0		0.0999592	-0.0144765	-0.00540662	0.0412311	0.141629	-0.0591617	-0.0252243		0.0196676	0.0192122	0.00688553	0.00584924	0.0675805	-0.292117	0.109851	-0.0286277		-0.00489556	-0.177094	-0.0518128	0.0271551	0.104924	-0.0107271
11	7.37	0		0.0335741	0.117956	0.00756788	-0.00751249	-0.021779	0.0450057	0.0531575		0.0184362	0.0527953	-0.0063548	-0.04923	0.00625163	-0.0519049	0.12288	0.00355019		0.00978939	0.135327	-0.0508966	-0.0664119	0.0832273	0.120513
12	8.04	0		0.10371	-0.00293958	0.00275166	-0.0279126	-0.0221867	0.106477	-0.00280552		0.0158358	0.0299536	-0.0225621	0.0144658	-0.0738447	0.0976968	-0.0493574	0.0303991		0.0972974	-0.00473097	-0.0804749	-0.00426099	-0.00179484	-0.0488597
13	8.71	0		-0.0944006	0.0908962	0.0407285	-0.0395774	0.0270367	-0.0667544	-0.061877		0.0219152	0.0330251	0.0161776	-0.00686243	-0.0605973	-0.000775596	-0.0128773	-0.0486282		-0.0389342	-0.0616313	-0.0828074	0.111804	-0.00270816	-0.0237742
14	9.38	1		-0.0438698	-0.00615051	-0.0195898	-0.0102756	0.0317681	-0.0434447	-0.090048		0.0729003	-0.00901921	0.00440264	-0.101272	-0.0681641	-0.151548	-0.00178052	-0.0325691		0.0919847	2.13111e-05	-0.115899	-0.0387206	0.0412851	-0.0144129
15	10.05	1		1.81841	0.697119	0.845837	1.11188	1.56649	0.968276	0.885568		-0.255688	0.135468	0.504632	0.293173	0.379007	0.646437	0.272658	0.0723537		-0.0445824	0.134636	-0.171165	-0.0263236	0.101641	-0.122659
16	10.72	1		2.00737	0.595984	0.736105	1.91677	2.35293	1.409	1.19488		0.0780168	0.0607981	0.440369	0.115389	0.329969	0.434106	0.4724	0.0970021		-0.148506	-0.0530701	-0.0880994	-0.0185223	-0.183858	-0.000247319
17	11.39	1		1.21159	0.265005	0.232694	1.49613	1.45728	0.87614	0.551066		-0.175577	-0.0346593	0.230227	0.0216586	0.0958828	0.394702	0.169669	0.052251		-0.0216171	0.105352	-0.103097	0.0408165	-0.0272995	0.126106
18	12.06	0		0.720358	0.239561	0.23944	1.04472	0.853442	0.498541	0.311259		0.104873	0.0794506	0.311973	0.120513	0.0500236	0.22679	0.200485	0.0880241		-0.124721	0.0273182	-0.083482	0.270438	0.00228297	0.00437604
19	12.73	0		0.439232	0.252871	0.258117	0.575759	0.57951	0.357016	0.249268		-0.0671749	0.017104	0.248771	-0.00503097	0.175008	0.0643736	0.0934621	0.0781853		-0.00482696	-0.0349493	0.0100132	0.237975	-0.00929315	0.0890269
20	13.4	0		0.580736	0.0902709	0.118663	0.455468	0.372984	0.188771	0.264538		-0.00984419	0.0445141	0.414044	0.0301241	0.163609	0.0741647	0.113931	0.0493707		0.0403763	-0.0734004	0.0447271	0.123626	0.0912307	0.0544091
21	14.07	0		0.242083	0.124751	0.096489	0.390552	0.400428	0.187747	0.116958		0.0158868	0.02127	0.283289	-0.0303412	0.192668	0.250912	0.246783	0.0911622		0.0523258	0.0269159	-0.054794	0.0577692	0.14155	0.0818688
22	14.74	0		0.196855	0.243108	0.118073	0.397703	0.338304	0.230346	0.173091		0.0753099	0.0330384	0.312986	-0.0525125	0.149111	0.064739	0.131126	0.083606		0.00336069	0.0672998	-0.0464162	0.16092	-0.0317784	0.103243
23	15.41	0		0.419504	0.217149	0.163949	0.310683	0.1547	0.122175	0.228385		-0.0405852	0.0285603	0.340512	-0.0251456	0.274385	0.140072	0.184052	0.0568572		-0.10777	0.0892881	0.00233323	0.158025	0.0161936	-0.0515349
24	16.08	0		0.281522	0.0465872	0.167446	0.259489	0.233435	0.089318	0.121535		0.143652	0.0116822	0.33023	-0.00936724	0.182165	0.203283	0.171952	0.029909		-0.00419655	-0.0330239	-0.063226	0.0707456	-0.10705	0.0495829
25	16.75	0		0.33478	0.0587682	0.122726	0.307278	0.222392	0.0473636	0.186155		-0.0892716	-0.0742944	0.300466	-0.0352806	0.187422	-0.0419737	0.0971088	-0.0180848		0.0303579	0.0317117	-0.0204015	0.0859721	-0.0289475	0.0179363
26	17.42	0		0.20591	0.121764	0.131575	0.230385	0.100388	0.0504864	0.147859		0.011791	0.0940028	0.212222	0.00291965	0.175093	0.259426	0.112657	-0.0515244		0.022172	-0.0570569	-0.0837725	0.161057	-0.0617187	-0.0600332
27	18.09	0		0.132154	0.121979	0.0862753	0.1927	0.280193	0.0855136	0.105302		0.0117932	-0.0103436	0.0685951	-0.0228287	0.180572	0.164347	0.079434	-0.0491287		0.0530278	0.082398	-0.0539254	0.0499045	0.0235636	-0.0514951
28	18.76	0		0.227408	0.019649	0.126063	0.124641	0.165376	0.0697623	0.0731652		-0.215105	0.0305777	0.0463548	-0.0499338	0.0888017	0.0696746	0.0975295	-0.0641472		0.0949452	0.0454136	-0.0111025	0.074268	-0.0745356	-0.038452
29	19.43	0		0.130511	0.0904202	0.0598125	0.103604	0.134721	-0.0181086	0.104121		-0.0475566	0.0323325	0.0814647	-0.106047	0.104785	-0.0605769	0.143643	-0.0912151		0.223848	0.0370458	-0.0891359	0.0571604	-0.0103589	-0.130489
30	20.1	0		0.0559942	-0.0088294	0.0327061	0.0951799	0.0924216	-0.0302542	0.0142881		0.0822014	0.000234874	0.0644463	-0.114468	0.00329501	-0.17644	0.0320073	-0.0895468		0.142606	-0.0427613	-0.0238149	0.0129618	-0.0650156	0.0123691
31	20.77	0		0.35112	0.128121	0.0393944	0.121511	0.147629	0.0135124	0.0503425		0.116588	0.0584275	0.0222216	-0.129917	0.0524861	0.0781425	0.0187686	-0.0920922		0.046551	0.0517372	-0.0310394	0.122216	0.0268359	0.00558901
32	21.44	1		0.153696	0.0903642	0.0430468	0.11149	0.0976025	0.0526657	0.0317171		0.158196	0.0820158	-0.0297891	0.0261344	0.0729586	0.0668014	0.0223258	-0.0468819		0.0382563	0.0779904	-0.0993587	-0.0744121	0.014009	-0.139395
33	22.11	1		1.11172	0.578921	0.515223	0.604448	1.46885	0.79047	0.859302		-0.0506185	-0.0628925	0.515538	0.0335231	0.226473	0.220773	0.142364	-0.0874781		-0.0080632	0.0428645	-0.0625338	0.0448267	0.00913565	-0.0500273
34	22.78	1		0.860773	0.2341	0.278655	0.51641	0.980173	1.0257	0.960431		-0.0583975	-0.0447402	0.324396	-0.066705	0.0861539	0.170636	0.12978	-0.128534		0.0856762	-0.0249958	-0.179722	-0.0699597	-0.115013	-0.0781164
35	23.45	1		0.282682	0.0893654	0.0561049	0.265239	0.619932	0.349369	0.4442		-0.0939643	-0.0288807	0.0992706	-0.17154	-0.101551	-0.146969	0.0412913	-0.0529621		0.01043	-0.0431445	-0.00392449	0.0964597	0.0295314	0.0525394
36	24.12	0		0.346429	0.0923617	0.0983336	0.10974	0.482257	0.160613	0.354896		-0.047845	-0.000532392	0.195759	-0.00840358	0.109524	-0.0196395	0.101696	-0.0518552		-0.0656544	0.11157	-0.0509323	0.129804	0.06895	0.0855603
37	24.79	0		0.324949	0.105728	0.113249	0.0493223	0.402153	0.111081	0.298758		-0.193718	-0.0483025	0.208502	0.000714783	0.0584096	0.137593	0.0881656	-0.00428794		0.0351348	0.0261362	-0.0468446	0.0358301	0.0289239	0.122737
38	25.46	0		0.354323	0.011435	0.117022	0.0867443	0.3395	0.109736	0.34358		-0.182182	-0.0201869	0.0679489	0.0346711	0.114069	0.198257	0.129327	0.0142424		-0.00294183	0.0989703	-0.0487706	0.118565	0.12206	0.076542
39	26.13	0		0.207473	0.0399693	0.09118	0.0851155	0.40862	0.0831954	0.215264		0.125971	0.00124221	0.0566418	0.0620736	0.176448	0.0415242	0.0135692	0.00153154		0.0300548	-0.00781559	-0.12085	-0.0216527	0.046777	-0.0906955
40	26.8	0		0.253916	0.0136658	-0.0311754	0.0882784	0.241369	0.0804197	0.230714		-0.0930546	0.000468452	0.0709983	-0.0745989	0.131535	0.264987	0.0850839	0.0245688		0.0106506	0.104351	0.0362466	0.142052	-0.045464	-0.0291772
41	27.47	0		0.341079	0.035713	0.108179	0.0811971	0.282225	0.163911	0.090037		0.00107658	-0.0746336	0.0896274	0.0376449	0.0586547	0.279712	0.0513247	-0.00886035		0.0300781	-0.00812492	-0.0560041	0.0307275	0.095965	-0.0781381
42	28.14	0		0.198293	0.10851	0.0582001	0.0650609	0.221487	0.0934149	0.141679		0.075636	0.0247051	0.0766509	-0.00311284	0.0994856	0.235554	0.0484158	-0.0899802		0.0783821	0.0732201	0.00213807	0.0848579	0.0159395	0.085298
43	28.81	0		0.154279	0.0274336	0.0268676	0.0701141	0.233613	0.191874	0.120854		-0.161539	0.043724	0.123235	-0.058601	0.256448	0.248883	0.00701889	-0.0687251		0.0679101	0.0559985	-0.0241436	0.0631039	-0.0536323	0.135896
44	29.48	0		0.0831949	0.136689	0.0246778	0.0211238	0.220698	0.111693	0.113334		-0.0579227	0.0455734	0.0352224	-0.0359214	0.289756	0.176712	0.092029	-0.0762583		0.00722493	-0.0156086	-0.0365736	0.0376238	-0.0690483	0.0310142
45	30.15	0		0.121127	0.0714066	0.0281646	0.00741627	0.155225	0.0524796	0.115533		0.146046	0.0433432	0.0852489	-0.0842454	-0.0230141	0.0272275	-0.0370476	-0.0790448		-0.0045021	0.0706515	-0.11514	0.0528714	0.0217906	-0.052251
46	30.82	0		0.212989	0.143849	0.0542042	0.0156006	0.0684154	0.0920353	0.0949194		0.0833285	-0.0804082	0.0256067	-0.0833963	0.174312	-0.0987214	0.0286985	-0.128897		0.15374	-0.0450875	-0.104836	0.0722081	0.015112	-0.0666224
47	31.49	0		0.196303	0.116341	0.0872724	0.0350249	0.157622	0.0649935	0.144389		-0.157441	0.0595336	0.049792	-0.0785253	0.0922349	0.0223333	0.0427289	-0.117241		0.0568883	0.0458223	-0.0492331	0.168058	0.0685688	0.104292
48	32.16	0		0.0971931	0.0892721	0.0227161	-0.00923328	0.134164	0.0193657	0.0644116		0.0187735	-0.0135564	0.0499101	-0.0893086	-0.034089	0.242144	0.115534	-0.0584003		0.0229213	0.120322	-0.0957444	0.102374	0.0461805	-0.026057
49	32.83	0		0.136179	0.051665	-0.0162065	0.0323652	-0.041946	0.0323071	0.0488211		-0.0155597	-0.0252884	0.0100948	-0.0595585	-0.0182642	0.28269	0.0445161	-0.0790786		0.0533759	-0.0538808	-0.100219	0.176774	0.00622193	-0.0762709
50	33.5	1		0.271683	0.0836623	0.00130367	-0.0167926	0.157314	0.0505122	0.0541215		0.0973467	0.00449599	-0.0629185	-0.0377823	0.171011	0.16214	0.135769	-0.0670013		-0.00526456	0.149788	-0.100799	0.078103	0.0431617	0.0552186
51	34.17	1		1.31069	0.299206	0.23505	0.215406	0.746459	1.05369	0.469059		0.051731	0.0132912	0.397934	-0.0999009	0.155981	0.332743	0.0257843	-0.0655052		0.0127652	-0.0393778	-0.141631	0.0854405	-0.11806	-0.0205492
52	34.84	1		1.4186	0.186608	0.110107	0.181249	0.349751	0.961323	0.827629		-0.0409336	-0.0978989	0.469553	-0.0059444	0.047918	0.516612	0.0706269	-0.111669		0.00195931	-0.0469271	-0.232238	-0.039544	-0.0819876	-0.0651
53	35.51	1		0.699874	0.0657781	-0.0164833	0.104359	0.292139	0.497726	0.32796		-0.12449	0.0300415	0.0669741	-0.000738052	0.012316	0.166102	0.250297	-0.0436863		0.0358195	-0.167698	-0.0171763	0.117027	-0.108438	-0.0519862
54	36.18	0		0.5418	0.140115	0.0615332	0.0781423	0.177029	0.365612	0.148641		-0.172422	-0.0228934	0.333799	-0.0617506	0.0418706	0.284694	0.0983615	-0.0243118		0.062483	-0.0556487	-0.119667	0.0782378	-0.0146873	0.0652268
55	36.85	0		0.474759	0.110862	-0.0669328	0.0497776	0.0627398	0.258477	0.142953		0.12111	-0.0493644	0.260236	0.0189766	0.157735	0.0939436	0.102184	0.0265958		0.033809	-0.0698303	-0.000373922	0.061623	0.0564304	5.59058e-05
56	37.52	0		0.521884	0.0715466	0.10698	0.0825034	0.0918415	0.170839	0.132799		-0.0293649	-0.0366527	0.201583	0.0264618	0.133718	0.0634541	0.0846924	-0.00767544		-0.0528861	-0.0137179	-0.0689791	0.126753	0.050741	0.0241152
57	38.19	0		0.306461	0.0772124	0.0184295	0.0101469	-0.0543058	0.233512	0.117736		-0.0791318	-0.0670801	0.320495	-0.0140568	0.0198957	0.135939	0.144032	0.0806748		-0.0774845	0.0975946	-0.0521715	0.215662	0.036484	0.007134
58	38.86	0		0.291088	0.0811048	0.0777394	0.0859594	0.0160105	0.155117	-0.00217248		-0.0289101	0.0344228	0.359715	-0.0356209	0.124707	0.143637	0.0402178	0.017893		0.0279784	0.0574981	-0.020033	0.213247	-0.115029	0.163216
59	39.53	0		0.127327	0.120028	-0.0442763	0.00484036	-0.00685684	0.0479718	0.059332		-0.107173	-0.0456159	0.306441	-0.0547867	0.0576234	0.0682067	-0.00291676	0.0415451		0.028918	0.0377345	-0.0156535	0.191942	0.0276016	0.111761
60	40.2	0		0.321107	0.0884694	0.0455	0.0729135	-0.0741473	0.0556531	0.109059		-0.207541	0.053594	0.142736	-0.0960301	0.115005	0.0929038	0.0241364	-0.00934875		0.0780605	-0.0563129	-0.0127606	0.0704497	-0.00404569	-0.00475289
61	40.87	0		0.106188	0.000700725	-0.00301398	-0.0114221	-0.122702	0.0597479	0.0615495		-0.0847254	0.0391493	0.17033	-0.0315586	0.235725	0.040004	0.0456612	-0.0330333		0.0437253	0.0563356	-0.0661341	0.121351	-0.0849569	0.0277619
62	41.54	0		0.158675	0.0614378	0.0136951	0.00484941	0.0867293	0.0639543	0.0424242		-0.0310867	-0.0173533	0.242081	-0.0744723	0.0842599	0.0706823	0.0951211	-0.108656		-0.0580344	-0.0117637	-0.0326267	0.118611	0.0364948	0.0549546
63	42.21	0		0.1609	-0.0263215	-0.00617377	-0.0129297	0.0111428	0.04718	0.0803483		-0.00369599	0.0343089	0.167779	-0.109938	0.109446	0.127347	0.156505	-0.106691		0.106832	-0.0711291	-0.0941775	0.175242	-0.0193419	-0.0435206
64	42.88	0		0.269631	0.111049	-0.0635229	0.0217441	0.0528088	0.0407156	-0.0873351		0.113486	0.144246	-0.00565746	-0.05752	0.135819	0.0493579	0.027278	-0.0964394		-0.00415288	0.0960283	-0.0672376	0.0871964	-0.0250935	0.1286
65	43.55	0		0.180227	0.0321847	-0.0215895	0.00579528	0.0170672	-0.0165679	0.0244759		-0.0139001	-0.0279965	0.0488498	-0.101114	0.0271034	0.00943374	0.00428671	-0.0595056		0.0352091	0.0270644	0.0475467	0.117339	0.0583019	0.0590091
66	44.22	0		0.192426	0.101248	0.0188513	-0.0110451	0.0571595	0.0414958	-0.0158779		0.122692	-0.0404904	0.0306856	-0.0505534	0.2148	-0.0131382	0.0708634	-0.0461112		0.00177395	-0.0589585	-0.0293849	0.0277689	-0.0298848	0.119466
67	44.89	0		0.149663	-0.0890561	-0.0513843	-0.00927639	0.0924002	-0.0407021	-0.00912169		-0.0172748	-0.0833314	0.0975313	-0.107718	0.182472	-0.103641	0.0208936	-0.0865001		0.104409	0.0117751	-0.0356963	0.0541082	-0.0607102	0.0935991
68	45.56	0		0.182436	0.0616991	-0.0133204	-0.00856605	-0.100315	0.113032	-0.0177904		-0.0388745	-0.094658	0.0586899	-0.0257014	-0.0423405	-0.0842893	0.0065553	-0.079363		0.0396927	-0.029514	-0.116813	0.0559399	-0.0791905	0.0993956
69	46.23	0		0.165285	0.0311393	-0.0106331	0.0144833	-0.0112232	0.0123181	-0.00275836		-0.0624023	-0.0107178	0.0642443	0.064506	0.0529156	-0.144778	0.0171099	-0.0524728		-0.0476396	0.0194492	-0.00128543	0.0870647	0.0136118	0.0409775
70	46.9	0		0.0860885	-0.0491341	0.0312918	0.0169499	-0.0110415	0.00509157	0.0282911		-0.219107	0.00116127	0.0723521	-0.0160378	0.115258	0.191517	0.0291953	-0.049125		0.0607922	-0.00160492	0.0334814	0.141911	-0.0531816	-0.044499
71	47.57	0		0.0831467	0.052449	-0.0295167	0.0260125	0.0468564	-0.164893	-0.037637		-0.00769865	-0.0325131	0.0584277	-0.052173	0.0357683	0.0784546	-0.00836515	-0.0835075		0.0874159	0.0299349	-0.0355872	0.0275676	-0.0208028	0.0498005
72	48.24	0		0.0951076	0.0604297	-0.00647718	0.053371	-0.0825656	0.102784	-0.0180428		-0.226644	-0.0497083	0.129058	-0.0219872	0.0916007	-0.0681918	-0.0671626	-0.0546675		0.0265667	0.10117	-0.035601	0.0372694	0.0332109	0.0443949
73	48.91	0		-0.0103295	0.0246241	0.0462901	0.0446701	-0.00287881	-0.123662	0.0137938		0.0670383	-0.018287	0.0779698	-0.0378329	-0.0977644	0.0977944	0.00333373	-0.0573043		0.188386	0.0427896	-0.0790686	0.0743687	-0.0954075	0.0296007
74	49.58	0		0.194992	-0.00390099	-0.0255251	0.0217478	-0.132428	-0.0212673	-0.0442712		0.192938	-0.0131289	0.110433	0.0235353	0.119647	0.11326	0.0467804	-0.0932692		0.0415612	-0.0292787	-0.00715048	0.0344795	-0.127505	-0.0308261
75	50.25	0		0.0141048	-0.0268722	-0.0402431	0.0226273	-0.124998	-0.142112	0.022218		-0.272582	-0.0793812	0.0935909	-0.0453309	0.0685319	0.0318856	0.0684289	-0.0818997		0.123056	0.0848322	-0.0145038	0.0704637	0.012578	0.0661687
76	50.92	0		0.0243412	0.0174648	-0.00250425	0.0146868	-0.0516909	-0.0763824	0.0410057		0.109026	-0.0613495	0.150071	-0.00489805	-0.0194296	0.0332618	-0.0330592	-0.0291178		0.0565081	0.0152819	-0.0163565	0.0622897	-0.0812388	0.0594005
77	51.59	0		0.0362053	0.0318767	0.0220868	-0.0513471	-0.00224638	-0.0926159	-0.0645036		-0.206056	-0.061113	0.0822492	-0.0216086	0.056326	-0.0124564	0.0586678	-0.0142536		0.0413104	-0.0614874	-0.0396789	0.14025	-0.0425209	0.0336098
78	52.26	0		0.10839	0.023896	-0.0071791	-0.0443142	-0.0135227	0.00100887	0.00928102		-0.113864	-0.05791	-0.0065084	-0.00580963	0.0992219	-0.234272	0.0233846	0.00981302		0.0337077	0.080016	-0.0468023	0.0307347	0.0354513	0.0011672
79	52.93	0		0.116321	0.0149632	-0.0339312	-0.0279177	0.05158	-0.143711	0.0314317		-0.0416081	-0.0719605	0.0960907	-0.0440253	0.0685137	-0.0501711	0.0253633	0.0288196		0.0298452	0.137848	0.0460901	0.167901	-0.0236577	0.00557973
