# Supplementary figures and images for: Taste quality and hunger interactions in a feeding sensorimotor circuit
Source: eLife journal article supplement (doi:10.7554/elife.79887), 2022-07-06

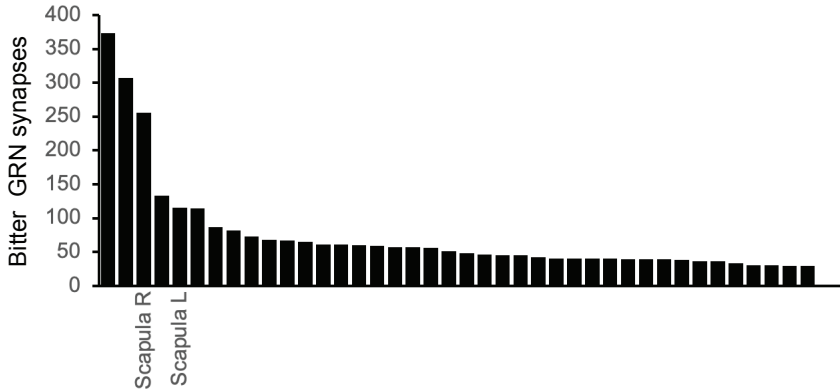

Supplement: supp [file elife-79887-supp-v1.zip]

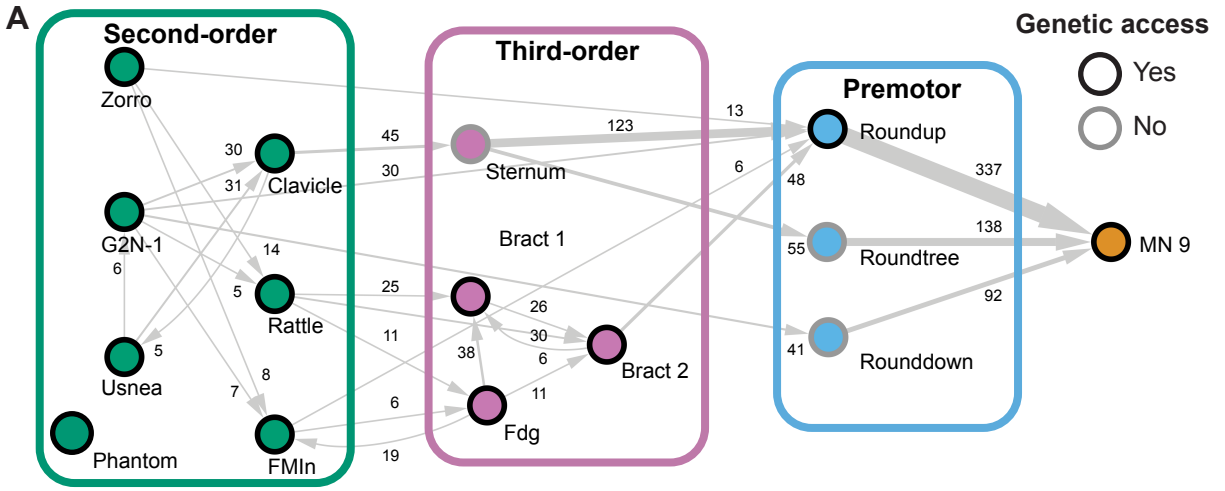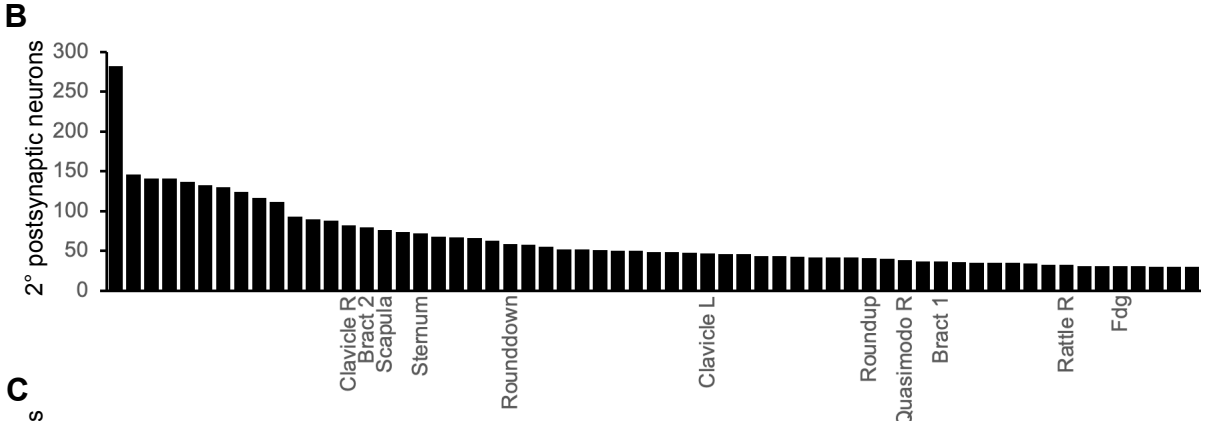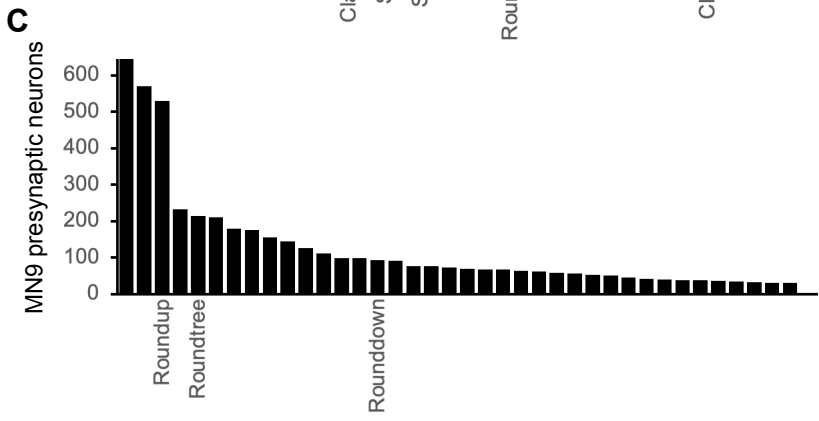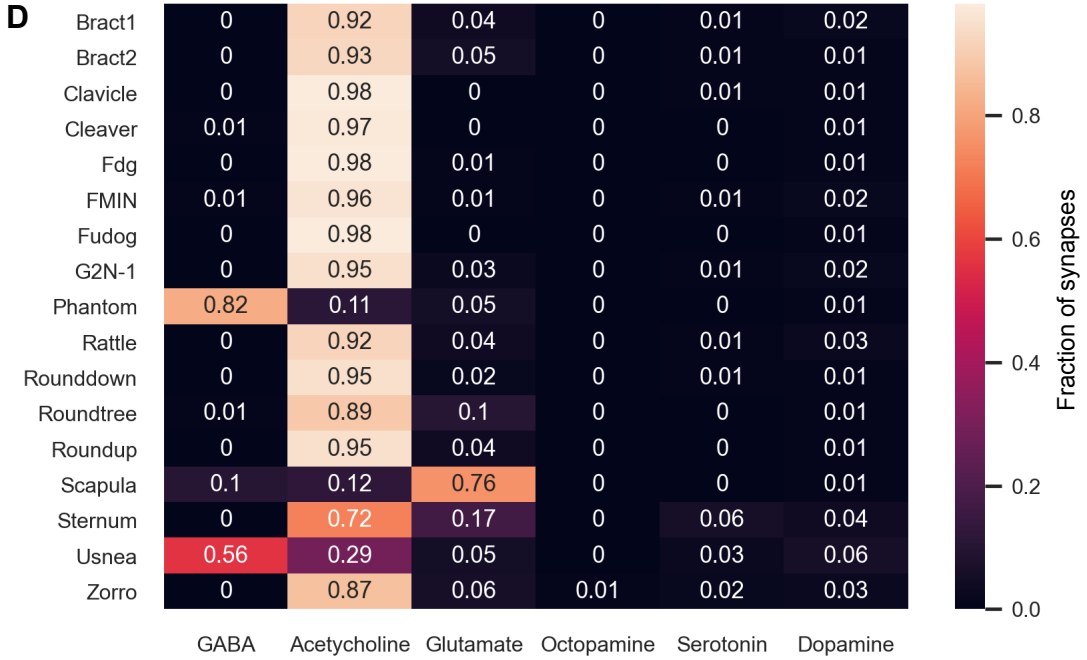

Supplement: supp [file elife-79887-supp-v1.zip]

**A**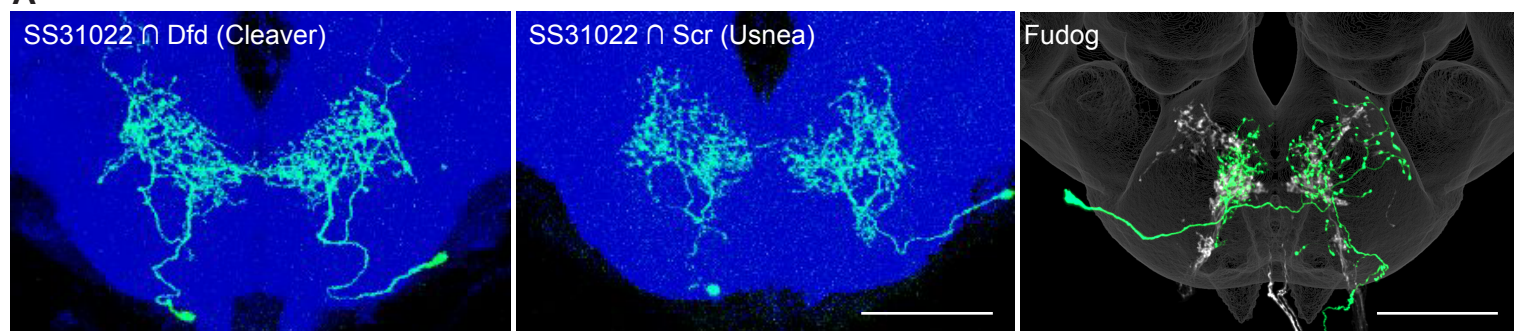**B**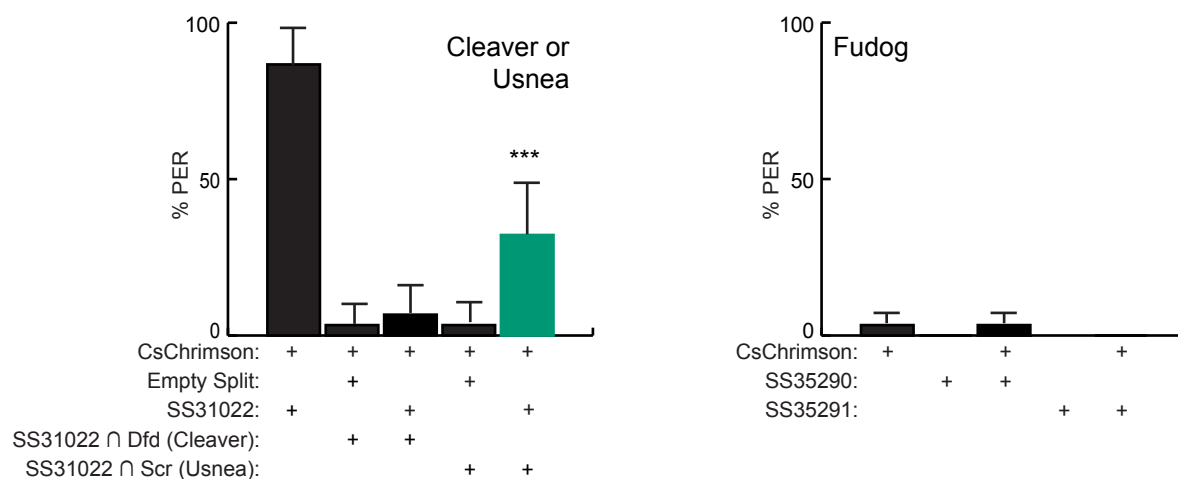**C**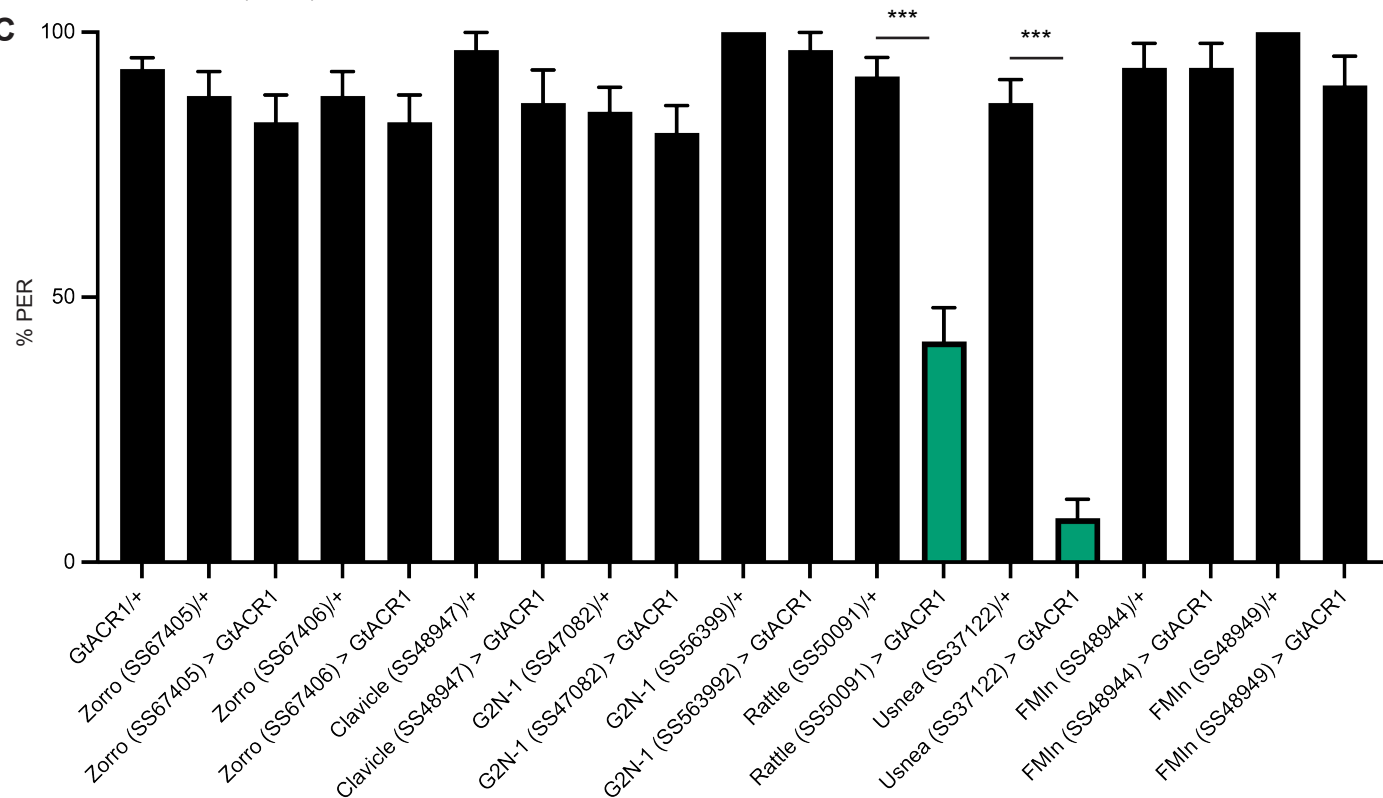

Supplement: supp [file elife-79887-supp-v1.zip]

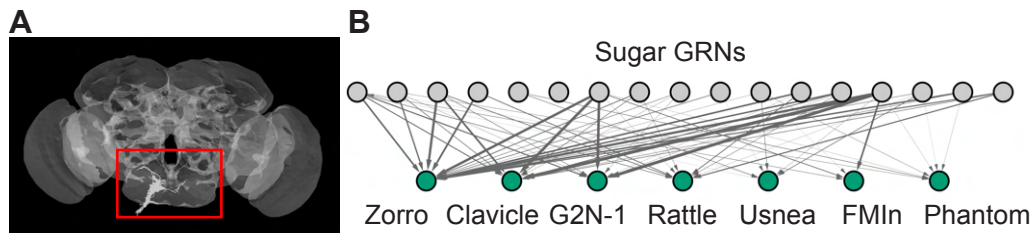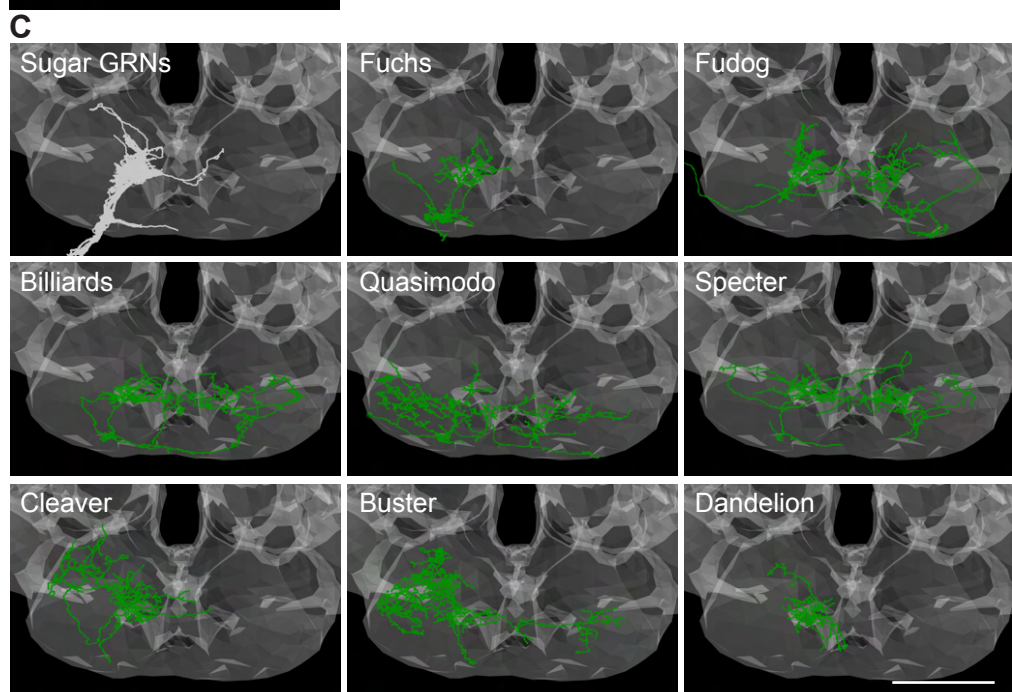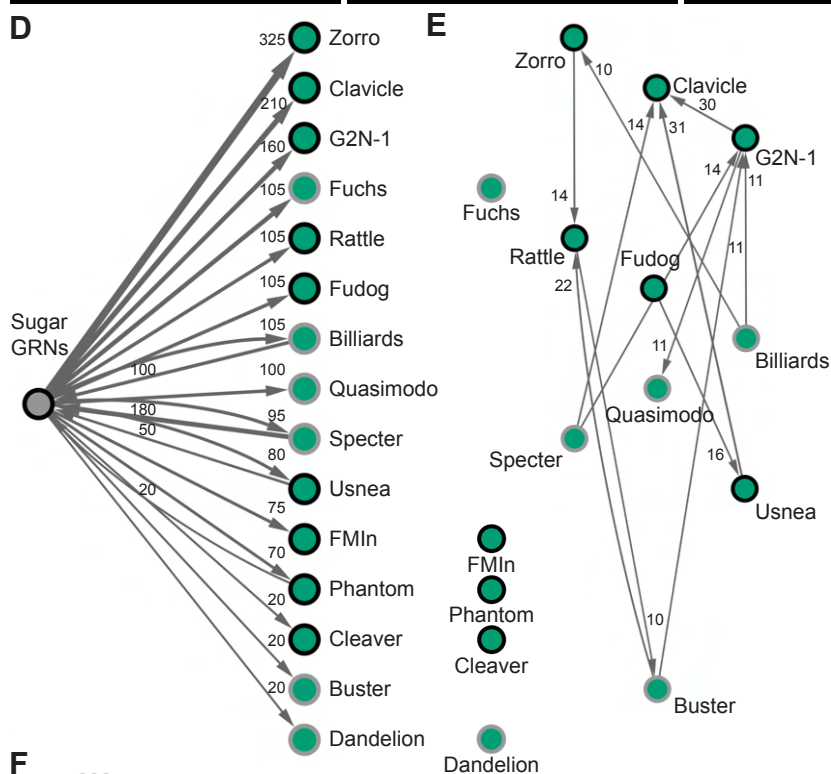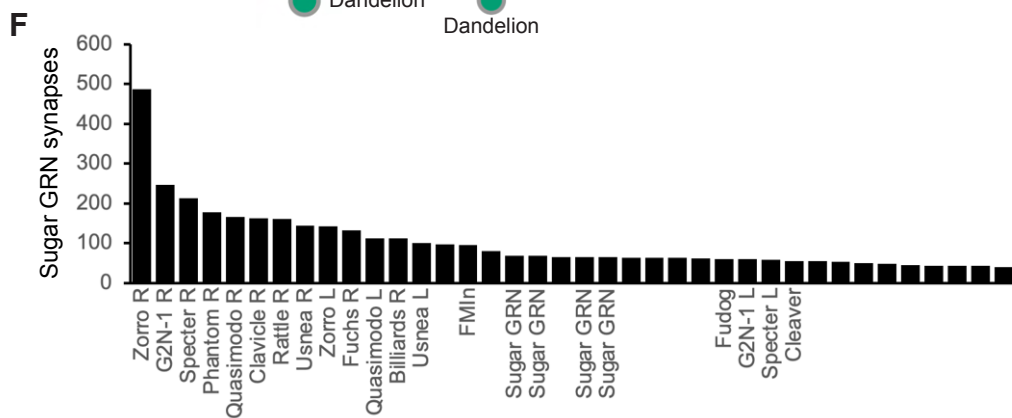

Supplement: supp [file elife-79887-supp-v1.zip]

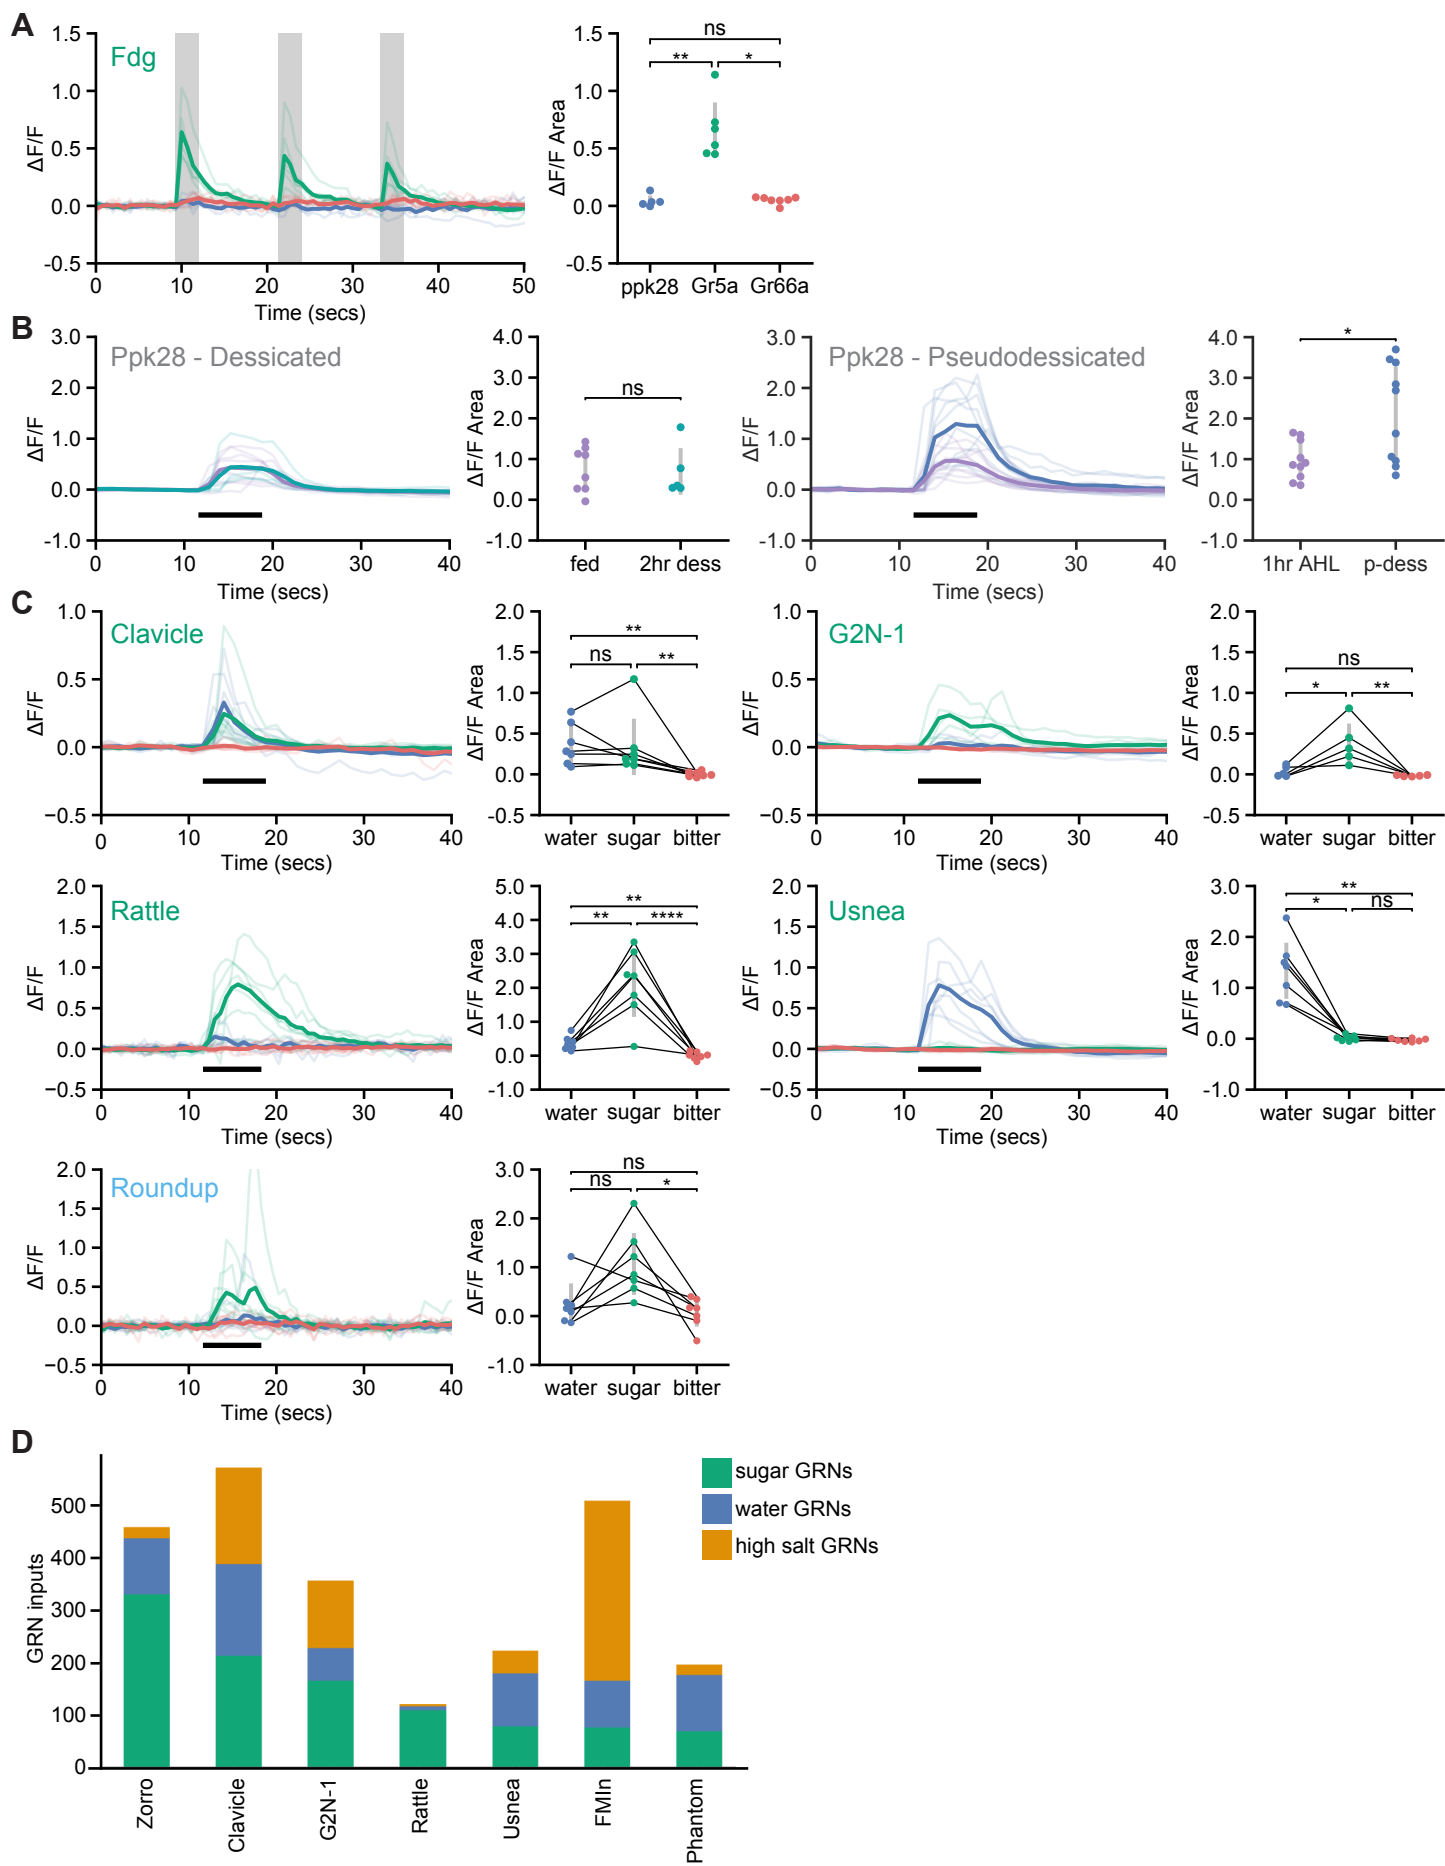

Supplement: supp [file elife-79887-supp-v1.zip]
